1  
2 Mutational sources of *trans*-regulatory variation affecting gene expression  
3 in *Saccharomyces cerevisiae*  
4

5  
6 **Fabien Duveau<sup>1,3</sup>, Petra Vande Zande<sup>2</sup>, Brian P. H. Metzger<sup>1</sup>, Crisandra J. Diaz<sup>2</sup>, Elizabeth**  
7 **A. Walker<sup>1</sup>, Stephen Tryban<sup>1</sup>, Mohammad A. Siddiq<sup>1</sup>, Bing Yang<sup>2</sup>, and Patricia J.**  
8 **Wittkopp<sup>1,2</sup>**

9  
10 <sup>1</sup> Department of Ecology and Evolutionary Biology

11 University of Michigan, Ann Arbor, MI 48109 USA

12 <sup>2</sup> Department of Molecular, Cellular, and Developmental Biology

13 University of Michigan, Ann Arbor, MI 48109 USA

14 <sup>3</sup> Laboratory of Biology and Modeling of the Cell,

15 Ecole Normale Supérieure de Lyon, CNRS, Université Claude Bernard Lyon 1, Université de  
16 Lyon, Lyon, France

17

18 Corresponding authors:

19 Patricia J. Wittkopp

20 Department of Ecology and Evolutionary Biology

21 Department of Molecular, Cellular, and Developmental Biology

22 University of Michigan, Ann Arbor, MI 48109-1048 USA

23 [wittkopp@umich.edu](mailto:wittkopp@umich.edu)

24 Tel: +1.734.763.1548

Fax: +1.734.763.0544

25

26 Fabien Duveau

27 Laboratory of Biology and Modeling of the Cell,

28 Ecole Normale Supérieure de Lyon, CNRS, Université de Lyon

29 46 Allée d'Italie, 69007 Lyon, France

30 [fabien.duveau@ens-lyon.fr](mailto:fabien.duveau@ens-lyon.fr)

31 Tel: +33 4 72 72 80 67

## 32 **Abstract**

33 Heritable variation in a gene's expression arises from mutations impacting *cis*- and *trans*-acting  
34 components of its regulatory network, with expression variation often derived from *trans*-  
35 regulatory mutations within species. Here, we investigate how *trans*-regulatory mutations are  
36 distributed within the genome and within a gene regulatory network by identifying and  
37 characterizing 69 mutations with *trans*-regulatory effects on expression of the same focal gene  
38 in *Saccharomyces cerevisiae*. Relative to 1766 mutations without effects on expression of this  
39 focal gene, we found that these *trans*-regulatory mutations were enriched in coding sequences  
40 of transcription factors previously predicted to regulate expression of the focal gene. However,  
41 over 90% of the *trans*-regulatory mutations identified mapped to other types of genes involved in  
42 diverse biological processes including chromatin state, metabolism and signal transduction.  
43 Finally, we find that the genomic distribution of these new regulatory mutations significantly  
44 overlaps with the genomic distribution of *trans*-regulatory variants segregating within *S.*  
45 *cerevisiae*.

## 46 **Introduction**

47 The regulation of gene expression is a complex process, essential for cellular function, that  
48 impacts development, physiology, and evolution. Expression of each gene is regulated by its  
49 *cis*-regulatory DNA sequences (e.g., promoters, enhancers) interacting either directly or  
50 indirectly with *trans*-acting factors (e.g. transcription factors, signaling pathways) encoded by  
51 genes throughout the genome. Genetic variants affecting both *cis*- and *trans*-acting components  
52 of regulatory networks contribute to expression differences within and between species (Albert  
53 & Kruglyak, 2015; Barbeira et al., 2018; Ferraro et al., 2020; Gamazon et al., 2018; Oliver et al.,  
54 2005). This regulatory variation arises the same way as genetic variation affecting any other  
55 quantitative trait: new mutations generate variation in gene expression and selection favors the  
56 transmission of some genetic variants over others, giving rise to polymorphism within a species  
57 and divergence between species. Because new mutations are the raw material for this  
58 polymorphism and divergence, knowing how new mutations impact gene expression is essential  
59 for understanding how gene regulation evolves (reviewed in Hill et al., 2020). Targetted  
60 mutagenesis has been used to systematically examine the effects of individual mutations in *cis*-  
61 regulatory sequences for a variety of elements in a variety of species (Hornung et al., 2012;  
62 Kwasnieski et al., 2012; Maricque et al., 2017; Melnikov et al., 2012; Metzger et al., 2015;  
63 Patwardhan et al., 2009; Sharon et al., 2012), but such targeted approaches are not well-suited  
64 for surveying the effects of new *trans*-regulatory mutations because *trans*-regulatory mutations  
65 can be located virtually anywhere within the genome. Consequently, we know comparatively  
66 little about the genomic sources, molecular mechanisms of action and evolutionary contributions  
67 of individual *trans*-regulatory mutations.

68  
69 Despite the vast potential target size for *trans*-regulatory mutations, regions of the genome most  
70 likely to harbor mutations affecting a particular gene's expression might be predictable from  
71 knowledge of the regulatory network controlling a gene's expression. Among eukaryotes, the set  
72 of genes and interactions regulating gene expression in *trans* is perhaps best understood in the  
73 baker's yeast *Saccharomyces cerevisiae* (Hughes & Boer, 2013): networks of regulatory

74 connections (Teixeira et al., 2018) have been inferred from experiments that profile the  
75 transcriptional effects of gene deletions (Hughes et al., 2000; Jackson et al., 2020; Kemmeren  
76 et al., 2014), map binding sites for transcription factors (Rhee & Pugh, 2011; Zheng et al., 2010;  
77 Zhu et al., 2009), identify protein-protein interactions (Gavin et al., 2002; Liu et al., 2020;  
78 Tarassov et al., 2008), and test pairs of genes for genetic interactions (Costanzo et al., 2016;  
79 Leeuwen et al., 2016). However, the extent to which the genomic sources of *trans*-regulatory  
80 mutations can be predicted from such networks is generally unknown (Flint & Ideker, 2019).  
81 Recently, a chemical mutagen was used to induce mutations throughout the genome of *S.*  
82 *cerevisiae*, and hundreds of mutant genotypes were collected that all altered expression of the  
83 same gene, providing the biological resources needed to systematically characterize properties  
84 of new *trans*-regulatory mutations and to test the predictive power of inferred regulatory  
85 networks.

86  
87 Here, we use genetic mapping, candidate gene sequencing and functional validation to identify  
88 69 *trans*-regulatory mutations that alter expression of the focal gene from this set of mutants  
89 and contrast their properties with a comparable set of 1766 mutations that did not affect  
90 expression of the focal gene. Using these data, we determined how these *trans*-regulatory  
91 mutations were distributed within the genome and within regulatory networks. For example, we  
92 asked how frequently *trans*-regulatory mutations were located in coding or non-coding  
93 sequences because *trans*-regulatory variants are often predicted to affect coding sequences  
94 (Hill et al., 2020) but some non-coding variants have been shown to be associated with *trans*-  
95 regulatory effects on gene expression (Consortium, 2020; Yao et al., 2017; Yvert et al., 2003).  
96 We also asked whether genes encoding transcription factors were the primary source of *trans*-  
97 regulatory variation, which is often assumed (Albert et al., 2018; Lewis et al., 2014) despite case  
98 studies identifying *trans*-regulatory variants in genes encoding proteins with other functions  
99 (Lutz et al., 2019; Mehrabian et al., 2005; Schadt et al., 2005; Yvert et al., 2003). To determine  
100 how well an inferred regulatory network can predict genomic sources of expression changes, we  
101 mapped the *trans*-regulatory mutations to a network of transcription factors predicted by  
102 functional genomic data to regulate expression of the focal gene and examined the molecular  
103 functions and biological processes impacted by *trans*-regulatory mutations that did not map to  
104 genes in this network. By systematically examining the properties and identity of new *trans*-  
105 regulatory mutations, this work fills a key gap in our understanding of how expression  
106 differences arise and may help predict sources of *trans*-regulatory variation segregating in  
107 natural populations. Indeed, we found that the genomic distribution of new *trans*-regulatory  
108 mutations overlaps significantly with the genomic distribution of *trans*-regulatory variants  
109 segregating among wild isolates of *S. cerevisiae* that affect expression of the same gene  
110 (Metzger & Wittkopp, 2019), suggesting that the mutational process generating new *trans*-  
111 regulatory variation significantly shaped the regulatory variation we see in the wild.

## 112 **Results and Discussion**

### 113 *Genetic mapping of trans-regulatory mutations*

114  
115 To characterize properties of new *trans*-regulatory mutations affecting expression of a focal  
116 gene, we took advantage of three previously collected sets of haploid mutants that all showed  
117 altered expression of the same reporter gene (Figure 1A, Gruber et al., 2012; Metzger et al.,  
118 2016). This reporter gene ( $P_{TDH3}$ -YFP) encodes a yellow fluorescent protein whose expression  
119 is regulated by the *S. cerevisiae* *TDH3* promoter, which natively drives constitutive expression  
120 of a glyceraldehyde-3-phosphate dehydrogenase involved in glycolysis and gluconeogenesis  
121 (McAlister & Holland, 1985). Mutations in these mutants were caused by exposure to the  
122 chemical mutagen ethyl methanesulfonate (EMS), which induces primarily G:C to A:T point  
123 mutations randomly throughout the genome (Shiwa et al., 2012). Together, these collections  
124 contain ~1500 mutants isolated irrespective of their fluorescence levels (“unenriched” mutants)  
125 and ~1200 mutants isolated after enriching for cells with the largest changes in fluorescence  
126 (Figure 1A). When we started this work, expression level of  $P_{TDH3}$ -YFP in these mutant  
127 genotypes had been described (Gruber et al., 2012; Metzger et al., 2016), but the specific  
128 mutations present within each mutant as well as which mutation(s) alter(s)  $P_{TDH3}$ -YFP  
129 expression in each genotype were unknown.

130  
131 From these collections, we selected 82 EMS-treated mutants for genetic mapping to identify  
132 individual causal mutations (Figure 1A). Sanger sequencing of the reporter gene in these  
133 mutants showed that none had mutations in the *TDH3* promoter or any other part of the reporter  
134 gene, indicating that they harbored mutations affecting  $P_{TDH3}$ -YFP expression in *trans*. 39 of  
135 these mutants were selected based on previously published fluorescence data, with 11 mutants  
136 selected from the collections enriched for large effects (red points in Figure 1B,C) and 28  
137 mutants selected from the unenriched collection (red points in Figure 1D). Each selected mutant  
138 showed changes in average YFP fluorescence greater than 1% relative to the un-mutagenized  
139 progenitor strain. Another 197 mutants from the unenriched collection (blue points in Figure 1D)  
140 were subjected to a secondary fluorescence screen, from which an additional 43 mutants with a  
141 change in fluorescence greater than 1% (red points in Figure 1E) were chosen. A 1% change in  
142 YFP fluorescence has previously been shown to correspond to a ~3% change in YFP mRNA  
143 abundance (see Methods and Duveau et al., 2018), although changes in fluorescence caused  
144 by *trans*-regulatory mutations in these mutants could affect either transcription driven by the  
145 *TDH3* promoter or post-transcriptional regulation of YFP synthesis or stability.

146  
147 To identify mutations within the 82 selected EMS mutants, and to determine which of these  
148 mutation(s) were most likely to affect YFP expression in each mutant, we performed bulk-  
149 segregant analysis followed by whole-genome sequencing (BSA-Seq) as described in Duveau  
150 et al. (2014) with minor modifications (see Methods). Briefly, each mutant strain was crossed to  
151 a common mapping strain expressing the  $P_{TDH3}$ -YFP reporter gene, and large populations of  
152 random haploid spores were isolated after inducing meiosis in the resulting diploids (Figure 2A).  
153 For each of the 82 segregant populations, a low fluorescent bulk and a high fluorescent bulk of  
154 ~ $1.5 \times 10^5$  cells each were isolated using fluorescence-activated cell sorting (FACS) (Figure  
155 2B). Genomic DNA extracted from each bulk was then sequenced to an average coverage of  
156 ~105x (ranging from 75x to 134x among samples, Supplementary File 1) to identify the  
157 mutations present within each mutant genotype and to quantify the frequency of mutant and



158 non-mutant alleles in both bulks (Figure 2C). A mutation causing a change in fluorescence is  
159 expected to be found at different frequencies in the two populations of segregant cells.  
160 Conversely, a mutation with no effect on fluorescence that is not genetically linked to a mutation  
161 affecting fluorescence is expected to be found at similar frequencies in these two populations.  
162 Prior work suggested this protocol should have 95% power to identify mutations altering  
163 fluorescence by 1% or more (Duveau et al., 2014).

164  
165 Using a stringent approach for calling sequence variants (see Methods), we identified a total of  
166 1819 mutations (Supplementary File 2), among which 1768 mutations (97.2%) were single  
167 nucleotide changes (Figure 2D). Of these single nucleotide changes, 96.3% were one of the two  
168 types of point mutations (G:C to A:T transitions) known to be primarily induced by EMS (Shiwa  
169 et al., 2012). 48 small indels and 3 aneuploidies, which could have arisen spontaneously or  
170 been introduced by EMS, were also identified. Of these 3 mutants with aneuploidies, 2 were  
171 found to have an extra copy of chromosome I and 1 was found to have an extra copy of  
172 chromosome V based on ~1.5 fold higher sequencing coverage of these chromosomes relative  
173 to the rest of the genome in the BSA-seq data from segregant populations (shown in  
174 Supplementary Table 1). We identified an average of 23.9 mutations per strain, which is within  
175 the 95% confidence interval of 21 to 45 mutations per strain estimated previously from the  
176 frequency of canavanine resistant mutants (Metzger et al., 2016). Surprisingly, the number of  
177 mutations per strain did not follow a Poisson distribution: we observed more strains with a  
178 number of mutations far from the average than expected for a Poisson process ( $P$ -value  $< 10^{-5}$ ,  
179 resampling test; Figure 2 - figure supplement 1), which could be explained by cell-to-cell  
180 heterogeneity in DNA repair after exposure to the mutagen (Liu et al., 2019; Uphoff et al., 2016).

181  
182 At least one mutation was significantly associated with fluorescence in 46 of the mutants  
183 analyzed based on likelihood ratio tests ( $G$ -tests described in Methods, Supplementary File 2),  
184 with a total of 67 mutations associated with fluorescence identified among these mutants,  
185 including all 3 aneuploidies (Supplementary Table 1). 29 mutants had a single mutation  
186 associated with fluorescence, 13 mutants had two associated mutations, and 4 mutants had  
187 three associated mutations. However, 8 of the 13 mutants with two associated mutations and all  
188 4 mutants with three associated mutations showed linkage (genetic distance below 25 cM)  
189 between at least two of the mutations associated with fluorescence, suggesting that only one of  
190 the linked mutations might impact fluorescence in each of these mutants. To determine whether  
191 one linked mutation was more likely to impact fluorescence than the others, we compared the  
192 magnitude of allele-frequency difference between the high and low fluorescence pools  
193 (estimated by the  $G$ -value) for each mutation. For 9 of the 12 mutants with linked mutations, we  
194 found that the mutation with the highest  $G$ -value was significantly more strongly associated with  
195 fluorescence than the linked mutation(s) (resampling test:  $P < 0.05$ , Supplementary File 3),  
196 suggesting that this mutation was responsible for the fluorescence change. For the other 3  
197 mutants, none of the linked mutations showed stronger evidence of impacting fluorescence than  
198 the others (resampling test:  $P > 0.05$ , Supplementary File 3).

199  
200 The remaining 36 mutants did not have any mutations significantly associated with fluorescence  
201 (Supplementary File 2). These mutants tended to show smaller changes in fluorescence than

202 mutants with one or more associated mutations (Figure 2 - figure supplement 2), suggesting  
203 that our power to map mutations causing 1% changes in fluorescence might have been lower  
204 than anticipated. These 36 mutants might also harbor multiple mutations with small effects on  
205 expression, each of which was below our detection threshold. Consistent with this possibility, we  
206 observed a small but significant correlation ( $r^2 = 0.127$ ,  $P = 0.03$ ) between the total number of  
207 mutations in these 36 EMS mutants and their expression level (Figure 2 - figure supplement 3).  
208 It is also possible that we failed to find associated mutations in some of these mutants because  
209 their change in fluorescence was initially overestimated by the “winner’s curse” (Xiao &  
210 Boehnke, 2009). Accordingly, 71% of mutants selected for mapping after two independent  
211 fluorescence screens had at least one mutation significantly associated with fluorescence  
212 compared to only 30% of mutants selected after a single fluorescence screen. Some changes in  
213 fluorescence observed in these 36 mutants might also have been caused by non-genetic  
214 variation and/or undetected mutations.

215

#### 216 *Additional trans-regulatory mutations identified by sequencing candidate genes*

217

218 We noticed in the BSA-seq data that three mutations increasing fluorescence more than 5%  
219 relative to the un-mutagenized progenitor strain mapped to two genes (*ADE4* and *ADE5*) in the  
220 same biochemical pathway (*de novo* purine biosynthesis) (Supplementary File 2). We therefore  
221 used Sanger sequencing to test whether these genes or other genes in this pathway were also  
222 mutated in 15 additional EMS mutants with fluorescence at least 5% higher than the progenitor  
223 strain. We first looked for mutations in *ADE4*, then *ADE5* if no mutation was found in *ADE4*, and  
224 then *ADE6* if no mutation was found in the other genes. At least one nonsynonymous mutation  
225 was identified by Sanger sequencing in one of these three genes in 14 of the 15 EMS mutants  
226 (green points in Figure 1C,E; Supplementary File 4). For the remaining mutant (brown point in  
227 Figure 1E), we sequenced a fourth purine biosynthesis gene, *ADE8*, but again found no  
228 mutation. In two additional EMS mutants with smaller increases in fluorescence (2.1% and  
229 4.6%, purple points in Figure 1D,E) and a reddish color characteristic of *ADE2* loss of function  
230 mutants (Roman, 1956), we found nonsynonymous mutations in *ADE2* by Sanger sequencing  
231 (Supplementary File 4). Follow-up experiments showed that mutations in *ADE2*, *ADE5*, and  
232 *ADE6* did not increase YFP fluorescence driven by two other promoters (*P<sub>RNR1</sub>* and *P<sub>STM1</sub>*),  
233 suggesting that mutations in the purine biosynthesis pathway affected expression of *P<sub>TDH3</sub>-YFP*  
234 through mechanisms mediated by the *TDH3* promoter rather than YFP (Figure 2 - figure  
235 supplement 4). Taken together, these data suggest that genes in the purine biosynthesis  
236 pathway might be the predominant mutational source of large increases in *TDH3* expression.

237

#### 238 *Functional testing confirms effects of trans-regulatory mutations identified by genetic mapping* 239 *and candidate gene sequencing*

240

241 To determine whether mutations statistically associated with fluorescence in the BSA-seq data  
242 actually affected expression of *P<sub>TDH3</sub>-YFP*, we introduced 34 of the 67 associated mutations  
243 individually into the fluorescent progenitor strain using scarless genetic engineering approaches  
244 (Supplementary File 5). We also used scarless genome editing to create single-site mutants for  
245 11 of the 17 additional mutations identified in purine biosynthesis genes by Sanger sequencing

246 (Supplementary File 4, Supplementary File 5). Fluorescence of these engineered strains (called  
247 “single-site mutants” hereafter) was then quantified by flow cytometry in parallel with  
248 fluorescence of the EMS mutant carrying the same associated mutation as well as the un-  
249 mutagenized progenitor strain, with four replicate populations analyzed for each genotype.  
250 Fluorescence values were then transformed into estimates of YFP abundance as described in  
251 the Methods.

252

253 Of the 24 mutations without linked variants in EMS mutants that were tested in single-site  
254 mutants, 23 (96%) caused a significant change in expression ( $P < 0.05$ , permutation test,  
255 Supplementary File 5), suggesting a ~4% false positive rate in our BSA-Seq experiment. In  
256 addition, all 11 single-site mutants with mutations in purine biosynthesis genes identified by  
257 Sanger sequencing showed statistically significant effects on fluorescence relative to the un-  
258 mutagenized progenitor strain (all increased fluorescence,  $P < 0.05$ , permutation test,  
259 Supplementary File 5). The remaining 10 mutations tested in single-site mutants were from 5 of  
260 the EMS mutants with two linked mutations associated with fluorescence. Each of these  
261 mutations was introduced separately into a single-site mutant to independently measure its  
262 effect on expression. For 4 of these 5 pairs of linked mutations, only one of the two single-site  
263 mutants showed a significant change in expression relative to the progenitor strain (Figure 2E).  
264 In each case, the single-site mutant and the EMS mutant showed changes in expression in the  
265 same direction relative to the progenitor strain (Figure 2E). The mutation affecting expression  
266 was always the mutation with the larger  $G$ -value in the BSA-Seq data, consistent with the  
267 results of the statistical tests described above (Supplementary File 3). In the last case (YPW54  
268 in Figure 2E), both mutations affected expression in the single-site mutants, consistent with our  
269 inability to statistically predict which mutation was more likely to impact expression from the  
270 BSA-Seq data for this mutant as well as both mutations being nonsynonymous changes in the  
271 same gene (*CHD1*) (Supplementary File 3). The BSA-seq data also accurately predicted  
272 whether a mutation increased or decreased fluorescence for 27 (93%) of the 29 mutations with  
273 significant effects on fluorescence in single-site mutants (Figure 2F). For the other two  
274 mutations, effects on expression in the same direction were observed in the single-site mutants  
275 and the corresponding EMS mutants (Supplementary File 5), suggesting that the different  
276 growth conditions used for the mapping experiment (see Methods) might have modified the  
277 effects of these mutations.

278

279 Comparing  $P_{TDH3}$ -YFP expression in the 40 single-site mutants that significantly altered  
280 fluorescence to that in the 40 EMS mutants from which these mutations were identified showed  
281 that expression was very similar overall between single-site and EMS mutants sharing the same  
282 mutation (Figure 2G, linear regression:  $r^2 = 0.944$ ,  $P = 2.4 \times 10^{-25}$ ), although significant  
283 differences in expression were observed for some pairs (Figure 2G, Figure 2 - figure  
284 supplement 5). These data suggest that (1) the vast majority of the mutations we identified by  
285 genetic mapping and candidate gene sequencing do indeed have *trans*-regulatory effects on  
286 expression of  $P_{TDH3}$ -YFP and (2) the majority of EMS mutants analyzed had a single mutation  
287 that was primarily, if not solely, responsible for the observed change in  $P_{TDH3}$ -YFP expression.  
288

## 289 *Properties of trans-regulatory mutations affecting expression driven by the TDH3 promoter*

290  
291 In all, 69 mutations showed evidence of affecting  $P_{TDH3}$ -YFP expression in *trans*, including 3  
292 aneuploidies and 66 point mutations. 52 of these mutations were identified by genetic mapping  
293 (Supplementary File 6) and 17 were identified by sequencing candidate genes (Supplementary  
294 File 4). 12 of the mutations identified by genetic mapping were genetically linked to one or more  
295 other mutations but showed stronger evidence of affecting  $P_{TDH3}$ -YFP expression than the linked  
296 mutation(s) in statistical and/or functional tests described above (Supplementary File 3). To  
297 identify trends in the properties of these 69 *trans*-regulatory mutations, we compared them to  
298 1766 mutations considered non-regulatory regarding  $P_{TDH3}$ -YFP expression because they  
299 showed no significant association with expression of the reporter gene in the BSA-Seq  
300 experiment.

301  
302 First, we asked whether the mutational spectra of *trans*-regulatory mutations differed from non-  
303 regulatory mutations (Figure 3A). We found that G:C to A:T transitions most commonly  
304 introduced by EMS occurred at similar frequencies in the two groups ( $G$ -test,  $P = 0.84$ ). No  
305 indels were associated with expression in the BSA-seq data (Supplementary File 6), which was  
306 not statistically different from the frequency of indels among non-regulatory mutations (0% vs  
307 2.7%,  $G$ -test,  $P = 0.056$ ). By contrast, aneuploidies were highly over-represented in the set of  
308 *trans*-regulatory mutations since all three extra copies of a chromosome observed in the BSA-  
309 Seq data were found to be associated with fluorescence ( $G$ -test,  $P = 8.6 \times 10^{-6}$ ). We also found  
310 a significant difference in the genomic distribution of the two sets of mutations ( $G$ -test,  $P = 2.4 \times$   
311  $10^{-3}$ ), with non-regulatory mutations appearing to be randomly distributed throughout the  
312 genome but *trans*-regulatory mutations enriched on chromosomes VII and XIII (Figure 3B,  
313 Figure 3 - figure supplement 1). However, these two chromosomes contain the purine  
314 biosynthesis genes in which multiple *trans*-regulatory mutations were identified, and there was  
315 no significant difference in genomic distributions between *trans*-regulatory and non-regulatory  
316 mutations when mutations in purine biosynthesis genes were excluded ( $G$ -test,  $P = 0.35$ ).

317  
318 *Trans*-regulatory mutations are often assumed to be located in coding sequences, but they can  
319 also be located in non-coding, presumably *cis*-regulatory, sequences of *trans*-acting genes (Hill  
320 et al., 2020). We therefore asked whether *trans*-regulatory mutations affecting  $P_{TDH3}$ -YFP  
321 expression were more often found in coding or non-coding regions of the genome than  
322 expected by chance. Of the 1766 non-regulatory mutations, 1257 (71.3%) were coding  
323 mutations located in exons, and 506 (28.7%) were non-coding mutations located in intergenic ( $n$   
324 = 500) or intronic ( $n = 6$ ) regions (Figure 3C). This paucity of mutations in introns is consistent  
325 with the rarity of introns in *S. cerevisiae*, and the overall frequency of non-coding mutations  
326 (28.7%) is similar to the fraction of the *S. cerevisiae* genome (30.6% of 12.1 Mb) considered  
327 non-coding (www.yeastgenome.org). By contrast, of the 66 *trans*-regulatory point mutations,  
328 only one was located in a non-coding sequence. This non-coding mutation was located in the  
329 intergenic sequence between *IOC2* and *KIN2*, presumably affecting expression of one or both  
330 genes with a downstream effect on  $P_{TDH3}$ -YFP expression. The 3 aneuploidies were excluded  
331 from this and subsequent analyses because they affected both coding and non-coding  
332 sequences of a large number of genes. The underrepresentation of non-coding changes among

333 regulatory mutations was statistically significant (1.5% of regulatory mutations are non-coding vs  
334 28.4% of non-regulatory mutations;  $G$ -test,  $P = 4.3 \times 10^{-9}$ ), suggesting that new mutations  
335 affecting  $P_{TDH3}$ -YFP expression in *trans* are more likely to alter coding than non-coding  
336 sequences. This enrichment in coding sequences might be because coding sequences tend to  
337 have a higher density of functional sites than non-coding sequences.

338  
339 Finally, we examined how *trans*-regulatory mutations located in coding sequences impacted the  
340 amino acid sequences of the corresponding proteins. Among mutations identified in coding  
341 sequences, we found that all *trans*-regulatory mutations changed the amino acid sequence of  
342 proteins whereas only 70% of non-regulatory mutations did (Figure 3D;  $G$ -test,  $P = 1.4 \times 10^{-4}$ ).  
343 This difference was primarily driven by mutations that introduced stop codons (nonsense  
344 mutations) rather than mutations that substituted one amino acid for another (nonsynonymous  
345 mutations): 20% of *trans*-regulatory mutations in coding sequences were nonsense mutations  
346 versus 3% of non-regulatory mutations (Figure 3D;  $G$ -test,  $P = 4.8 \times 10^{-6}$ ), and 80% of *trans*-  
347 regulatory mutations were nonsynonymous versus 67% of non-regulatory mutations (Figure 3D;  
348  $G$ -test,  $P = 0.07$ ). Nonsense mutations always altered an arginine, glutamine, or tryptophan  
349 codon (Figure 3E), consistent with the structure of the genetic code and the types of mutations  
350 induced by EMS (figure S8 in Metzger et al., 2016). For nonsynonymous mutations, two types of  
351 amino acid changes were particularly enriched among *trans*-regulatory mutations (Figure 3E;  
352 Figure 3 - figure supplement 2): 26.2% of *trans*-regulatory mutations changed glycine to aspartic  
353 acid versus 5.2% of non-regulatory mutations (permutation test,  $P < 10^{-4}$ ), and 10.8% of *trans*-  
354 regulatory mutations changed glycine to glutamic acid versus 2.7% of non-regulatory mutations  
355 (permutation test,  $P = 0.0042$ ). As a consequence, mutations altering glycine codons were  
356 strongly over-represented in general among *trans*-regulatory mutations (49.2% of *trans*-  
357 regulatory mutations vs 14.5% of non-regulatory mutations in coding sequences; permutation  
358 test,  $P < 10^{-4}$ ), perhaps because glycine is the smallest amino acid, making its substitution likely  
359 to modify protein structure (Bhate et al., 2002; Miller, 2007). Indeed, glycine is one of the three  
360 amino acids with the lowest experimental exchangeability (Yampolsky & Stoltzfus, 2005) and  
361 mutations affecting glycine codons are enriched among mutations causing human diseases  
362 (Khan & Vihinen, 2007; Molnár et al., 2016; Vitkup et al., 2003).

363  
364 *Regulatory mutations are enriched in a predicted TDH3 regulatory network*

365  
366 Because of the key role transcription factors play in the regulation of gene expression, and  
367 because transcription factors have been shown to be a source of *trans*-regulatory variation in  
368 natural populations (Albert et al., 2018; Lewis et al., 2014), we asked whether *trans*-regulatory  
369 mutations affecting  $P_{TDH3}$ -YFP expression were enriched in genes encoding transcription  
370 factors. We found that 5 (7.7%) of the 65 *trans*-regulatory coding mutations mapped to the  
371 coding sequence of one of the 212 genes predicted to encode a transcription factor in the  
372 YEASTRACT database (Teixeira et al., 2018), but this was not significantly more than the 5.6%  
373 of non-regulatory coding mutations mapping to these genes ( $G$ -test:  $P = 0.52$ ). Not all  
374 transcription factors are expected to regulate expression of *TDH3*, however, so we also tested  
375 for enrichment of *trans*-regulatory mutations among transcription factors specifically predicted to  
376 regulate *TDH3*.



377  
378 Using information consolidated in the YEASTRACT database (Teixeira et al., 2018) that  
379 supports evidence of a transcription factor binding to a gene's promoter and regulating its  
380 expression, we constructed a network (Figure 4) of potential direct regulators of *TDH3* as well  
381 as potential direct regulators of these direct regulators (1<sup>st</sup> and 2<sup>nd</sup> level regulators of *TDH3*) and  
382 asked how often the *trans*-regulatory mutations we identified mapped to these genes. We found  
383 that 4 *trans*-regulatory mutations mapped to three genes in this network, with 2 mutations  
384 affecting the 1<sup>st</sup> level regulator *TYE7*, 1 mutation affecting the 1<sup>st</sup> level regulator *GCR2*, and 1  
385 mutation affecting the 2<sup>nd</sup> level regulator *TUP1* (Supplementary File 6). This number of  
386 mutations mapping to genes in the predicted *TDH3* regulatory network was 12-fold greater than  
387 expected by chance (6% for *trans*-regulatory vs 0.5% for non-regulatory mutations; G-test,  $P =$   
388 0.0037), thus the inferred regulatory network had predictive power even though the vast majority  
389 of *trans*-regulatory coding mutations (61 of 65, or 94%) mapped to other genes. Only one of  
390 these other *trans*-regulatory mutations mapped to a transcription factor. This mutation was a  
391 nonsynonymous substitution affecting *ROX1*, which is predicted in the YEASTRACT database  
392 to directly regulate expression of the indirect *TDH3* regulator *TUP1*. In other words, *ROX1* is  
393 predicted by existing functional genomic data to be a 3<sup>rd</sup> level regulator of *TDH3* (Figure 4). With  
394 no other transcription factors harboring a *trans*-regulatory mutation in our dataset, this result  
395 suggests that mutations in transcription factors located more than three levels away from *TDH3*  
396 in its transcriptional regulatory network are unlikely to be sources of new expression changes  
397 driven by the *TDH3* promoter.

#### 398 399 *Deleterious effects of mutations in two direct regulators of TDH3*

400  
401 Transcription factors encoded by the *TYE7* and *GCR2* genes found to harbor *trans*-regulatory  
402 mutations affecting expression of  $P_{TDH3}$ -*YFP* are known to regulate the expression of glycolytic  
403 genes (including *TDH3*) by forming a complex with transcription factors encoded by the *RAP1*  
404 and *GCR1* genes (Shively et al., 2019). Rap1p (Yagi et al., 1994) and Gcr1p (Huie et al., 1992)  
405 are both known to bind directly to the *TDH3* promoter (Figure 5A), and mutations in these  
406 binding sites cause large decreases in *TDH3* expression (Metzger et al., 2015). These  
407 observations strongly suggest that mutations in *RAP1* and *GCR1* should also cause detectable  
408 changes in *TDH3* expression, yet no mutations were observed in these genes in our set of  
409 *trans*-regulatory mutations. To investigate why we did not recover *trans*-regulatory mutations in  
410 *RAP1* or *GCR1*, we used error-prone PCR to generate mutant alleles of these genes with  
411 mutations in either the promoter or coding sequence of *RAP1* or the second exon of *GCR1*,  
412 which includes 99.7% of the *GCR1* coding sequence (Figure 5B). Hundreds of these *RAP1* and  
413 *GCR1* mutant alleles were then introduced individually into the un-mutagenized strain carrying  
414 the  $P_{TDH3}$ -*YFP* reporter gene using CRISPR/Cas9-guided allelic replacement. Sequencing the  
415 mutated regions of *RAP1* and *GCR1* in a random subset of transformants showed that each  
416 strain harbored an average of 1.8 mutations in the *RAP1* gene (Figure 5C) or 2.4 mutations in  
417 the *GCR1* gene (Figure 5D). As expected for PCR-based mutagenesis, the number of mutations  
418 per strain appeared to follow a Poisson distribution both for *RAP1* mutants (Figure 5C, Chi-  
419 square goodness of fit,  $P = 0.14$ ) and *GCR1* mutants (Figure 5D, Chi-square goodness of fit,  $P$   
420 = 0.79).



421  
422 Among the *RAP1* mutant strains, only 9.1% (43 of 470 strains) showed a significant change in  
423  $P_{TDH3}$ -YFP expression greater than 3% (corresponding to a ~1% change in fluorescence)  
424 relative to the un-mutagenized progenitor strain (Figure 5E), suggesting that most EMS mutants  
425 harboring coding mutations in *RAP1* would have been excluded from our mapping study. In  
426 addition, the strongest decrease in  $P_{TDH3}$ -YFP expression observed among *RAP1* mutants  
427 (17%) was substantially smaller than the strongest decrease in expression caused by mutating  
428 the *RAP1* binding site in the *TDH3* promoter (57.5% reported in Duveau et al., 2018),  
429 suggesting that even this most severe phenotype was not caused by a null allele of *RAP1*. To  
430 test this hypothesis, we used site-directed mutagenesis to alter 5 amino acids (one at a time) in  
431 Rap1p expected to disrupt DNA binding based on the crystal structure of Rap1p complexed with  
432 DNA (Konig et al., 1996). In each case, we obtained by PCR a DNA fragment containing either  
433 a synonymous mutation in the codon corresponding to the amino acid (which should not affect  
434 the DNA binding of Rap1p) or one of two nonsynonymous mutations, with one nonsynonymous  
435 mutation more likely to alter protein function than the other (Yampolsky & Stoltzfus, 2005). We  
436 then used CRISPR/Cas9 allele replacement to introduce each mutation into the yeast genome  
437 and sequenced 10 independent clones from each transformation to determine if the mutation  
438 was introduced in the *RAP1* coding sequence as intended. All five synonymous mutations were  
439 observed in several of the clones sequenced, but 7 of the 10 nonsynonymous mutations were  
440 never recovered (Supplementary File 7). This outcome suggests that nonsynonymous  
441 mutations altering the DNA binding of Rap1p are lethal or nearly lethal, making them unlikely to  
442 have been recovered in a mutagenesis screen. Indeed, Rap1p1 is known to be an essential,  
443 pleiotropic transcription factor playing critical roles in regulating expression of glycolytic genes  
444 like *TDH3* as well as ribosomal proteins and genes required for mating (reviewed in Piña et al.,  
445 2003). Taken together, these data indicate that *RAP1* mutations are unlikely to be common  
446 sources of variation in expression driven by the *TDH3* promoter.

447  
448 For the *GCR1* mutant strains, 37.7% showed a significant change in  $P_{TDH3}$ -YFP expression  
449 greater than 3% relative to the un-mutagenized progenitor strain (Figure 5F). Several of these  
450 mutant alleles decreased the expression driven by the *TDH3* promoter by ~80%, which is  
451 similar to the previously reported effects of mutations in the Gcr1p binding sites of the *TDH3*  
452 promoter (Metzger et al., 2015), suggesting that they were null alleles. Indeed, resequencing  
453 these large effect alleles revealed that one of them had a single nucleotide insertion in the 28<sup>th</sup>  
454 codon of the *GCR1* ORF, which led to a frame shift eliminating 96% of amino acids (757 of 785)  
455 from Gcr1p. Because Gcr1p regulates expression of many glycolytic genes (Uemura et al.,  
456 1997) and *GCR1* deletion has been reported to cause severe growth defects in fermentable  
457 carbon source environments (Clifton et al., 1978; Hossain et al., 2016; López & Baker, 2000),  
458 we hypothesized that the fitness effects of mutations in *GCR1* might also have caused them to  
459 be underrepresented in the population from which the EMS mutants analyzed were derived. To  
460 test this hypothesis, we measured the relative fitness of 62 of the 220 *GCR1* mutants, including  
461 all mutants with decreased  $P_{TDH3}$ -YFP expression. *GCR1* mutants causing the largest changes  
462 in  $P_{TDH3}$ -YFP expression showed strong defects in growth rate; however, several *GCR1* mutants  
463 with changes in  $P_{TDH3}$ -YFP expression greater than 3% did not strongly affect fitness (Figure  
464 5G). This observation suggests that some of the coding mutations in *GCR1* decreasing  $P_{TDH3}$ -

465 *YFP* expression could have been sampled among the EMS mutants used for mapping. We  
466 therefore conclude that mutations in *GCR1* were most likely not recovered in our set of  
467 regulatory mutations because of the wide diversity of mutations that can affect *TDH3* expression  
468 and the limited number of EMS mutants included in the mapping experiment.

#### 470 *Properties of genes harboring regulatory mutations*

471  
472 With only 5 of the 65 *trans*-regulatory point mutations in coding sequences mapping to  
473 transcription factors, we used gene ontology (GO) analysis to examine the types of genes  
474 harboring *trans*-regulatory mutations affecting *P<sub>TDH3</sub>-YFP* expression more systematically. In all,  
475 these 65 mutations mapped to 42 different genes, with 9 genes affected by more than one  
476 mutation, 4 of which were genes involved in the *de novo* purine biosynthesis pathway (Figure  
477 6A). Several gene ontology terms were significantly enriched among genes affected by *trans*-  
478 regulatory mutations relative to genes affected by non-regulatory mutations. Supplementary File  
479 8 includes all enriched GO terms, whereas Figure 6B only includes enriched GO terms that are  
480 not parent to other GO terms in the GO hierarchy. Of the 33 GO terms enriched for *trans*-  
481 regulatory mutations shown in Figure 6B, 11 terms (including 13 of the 42 genes with *trans*-  
482 regulatory mutations) were related to chromatin structure (Figure 6B), which is known to play an  
483 important role in the regulation of gene expression (Li et al., 2007). An additional 5 GO terms  
484 (including 6 genes with *trans*-regulatory mutations) were related to metabolism, and 4 terms  
485 (including 9 genes with *trans*-regulatory mutations) were related to transcriptional regulation  
486 (Figure 6B). Three GO terms related to glucose signaling, including regulation of transcription by  
487 glucose, carbohydrate transmembrane transport and glucose metabolic process, were also  
488 significantly enriched for genes affected by *trans*-regulatory mutations (Figure 6B). When we  
489 broadened this category of genes based on a review of glucose signaling (Santangelo, 2006),  
490 the enrichment included 5 genes implicated in glucose signaling (Supplementary File 9; 12.2%  
491 of genes affected by *trans*-regulatory mutations were involved in glucose signaling vs 2.7% of  
492 genes affected by non-regulatory mutations; Fisher's exact test:  $P = 6.2 \times 10^{-3}$ ).

493  
494 At the pathway level, we found that genes involved in glycolysis and *de novo* purine  
495 biosynthesis were also significantly enriched for *trans*-regulatory mutations (Figure 6B), with the  
496 latter driven by the mutations in *ADE2*, *ADE4*, *ADE5* and *ADE6* genes described above  
497 (Supplementary File 10). Genes involved in iron homeostasis also emerged as an over-  
498 represented group, with 5 GO terms (including 7 genes) being related to the regulation of  
499 intracellular iron concentration (Figure 6B). Diverse cellular processes implicated in iron  
500 homeostasis were represented among genes harboring *trans*-regulatory mutations, such as iron  
501 transport (*FTR1*, *CCC2*), iron trafficking and maturation of iron-sulfur proteins (*CIA2*, *NAR1*),  
502 transcriptional regulation of the iron regulon (*FRA1*) and post-transcriptional regulation of iron  
503 homeostasis (*TIS11*). Remarkably, nearly half of all *trans*-regulatory point mutations in coding  
504 sequences (31 of 65) were located in genes involved either in purine biosynthesis or iron  
505 homeostasis. Moreover, 6 of the 8 genes harboring more than one *trans*-regulatory mutation  
506 (Figure 6A) were involved in one of these two processes. Mutations in purine biosynthesis  
507 genes tended to cause large increases in expression, whereas mutations in iron homeostasis  
508 genes tended to cause large decreases in expression (Supplementary File 10). Although the

509 mechanistic relationship between these pathways and *TDH3* expression is not known, changing  
510 cellular conditions, including concentrations of metabolites (Pinson et al., 2009) or iron within  
511 the cell (reviewed in Outten & Albetel, 2013), can affect the regulation of gene expression.  
512 Ultimately, our data suggest that although mutations affecting  $P_{TDH3}$ -*YFP* expression map to  
513 genes with diverse functions, genes involved in a small number of well-defined biological  
514 processes are particularly likely to harbor such *trans*-regulatory mutations.

515  
516 *Trans-regulatory mutations are enriched in genomic regions harboring natural variation affecting*  
517 *TDH3 expression*

518  
519 Because new mutations affecting gene expression provide the raw material for regulatory  
520 variation segregating within a species, we asked whether the *trans*-regulatory mutations we  
521 observed were enriched in genomic regions associated with naturally occurring *trans*-regulatory  
522 variation affecting expression driven by the *TDH3* promoter. Specifically, we compared the  
523 genomic locations of *trans*-regulatory mutations identified in the current study to the locations of  
524 ~100 *trans*-acting quantitative trait loci (QTL) affecting expression of  $P_{TDH3}$ -*YFP* identified from  
525 crosses between the progenitor strain of the EMS mutants (BY) and 3 other *S. cerevisiae*  
526 strains (SK1, YPS1000, M22) (Metzger & Wittkopp, 2019) (Figure 7A).

527  
528 Non-regulatory mutations were observed in eQTL regions as often as expected by chance  
529 (66.7% of non-regulatory mutations vs 65.1% of the whole genome in eQTL regions; *G*-test:  $P =$   
530 0.15), but the 66 *trans*-regulatory mutations were significantly enriched in eQTL regions (Figure  
531 7B; 88% of *trans*-regulatory mutations vs 66.7% of non-regulatory mutations in eQTL regions;  
532 *G*-test:  $P = 9.6 \times 10^{-5}$ ). The overrepresentation of *trans*-regulatory mutations in eQTL regions  
533 remained statistically significant when we considered only the 44 *trans*-regulatory mutations  
534 identified from the collection of EMS mutants not enriched for large effects (Figure 7B; *G*-test:  $P =$   
535 0.027) or only the 22 *trans*-regulatory mutations identified from EMS mutants enriched for  
536 large effects (Figure 7B; *G*-test:  $P = 3.3 \times 10^{-5}$ ). The enrichment of *trans*-regulatory mutations in  
537 eQTL regions was thus not only driven by the effect size of these mutations or by the fact that  
538 several of the *trans*-regulatory mutations with large effects were located in the same genes.  
539 When we considered eQTL regions identified from each cross separately, we observed a  
540 significant enrichment of *trans*-regulatory mutations in eQTL regions identified in SK1 x BY and  
541 YPS1000 x BY crosses, but not in eQTL regions identified in the M22 x BY cross (Figure 7B; *G*-  
542 tests:  $P = 0.016$  for SK1 x BY,  $P = 6.5 \times 10^{-3}$  for YPS1000 x BY,  $P = 0.70$  for M22 x BY). This  
543 pattern might be explained by the close genetic relatedness between BY and M22 (Metzger &  
544 Wittkopp, 2019) or by the specific ecological niche of M22 isolated from an Italian vineyard  
545 (Capece et al., 2012). Overall, the enrichment of *trans*-regulatory mutations in eQTL regions  
546 suggests that biases in the mutational sources of regulatory variation have shaped genetic  
547 sources of expression variation segregating in wild populations.

## 548 **Conclusions**

549 By systematically isolating and characterizing 69 *trans*-regulatory mutations that all affect  
550 expression of the same focal gene, this study reveals how *trans*-regulatory mutations are

551 distributed within a genome and within a regulatory network. For example, we found that these  
552 *trans*-regulatory mutations were widely spread throughout the genome, with all except one  
553 located in coding sequences. These data also allowed us to determine how well a regulatory  
554 network inferred from integrating functional genomic and genetic data can predict sources of  
555 *trans*-regulatory variation. Like many biological networks, transcriptional regulatory networks  
556 have been inferred with the promise of explaining relationships between genetic variants and  
557 the higher order trait of gene expression, but the predictive power of such networks remains  
558 sparsely tested (Flint & Ideker, 2019).

559  
560 We found that although the *trans*-regulatory mutations in coding regions were not enriched in  
561 transcription factors generally, they were overrepresented among transcription factors inferred  
562 to be regulators of *TDH3*. None of these transcription factors are known to directly bind to the  
563 *TDH3* promoter, however, and mutations in *RAP1* and *GCR1*, which have well characterized  
564 binding sites in the *TDH3* promoter, were notably missing from our set of *trans*-regulatory  
565 mutations affecting *P<sub>TDH3</sub>-YFP* expression. Targeted mutagenesis of *RAP1* and *GCR1*  
566 suggested that most mutations in these genes (particularly *RAP1*) cause severe growth defects  
567 that might have prevented their recovery in mutagenesis screens. Over 90% of the *trans*-  
568 regulatory mutations examined were located in genes outside of this network encoding proteins  
569 with diverse molecular functions involved in chromatin remodeling, nonsense-mediated mRNA  
570 decay, translation regulation, purine biosynthesis, iron homeostasis, and glucose sensing.  
571 Surprisingly, nearly half of the *trans*-regulatory mutations mapped to genes involved in either the  
572 purine biosynthesis or iron homeostasis pathways. Although not anticipated, finding so many  
573 *trans*-regulatory mutations in genes that are not transcription factors is consistent with the  
574 transcriptomic effects of gene deletions showing that transcription factors tend not to affect  
575 expression of more genes than other types of proteins (Featherstone & Broadie, 2002).  
576 Consequently, it seems that regulatory networks describing the relationships between  
577 transcription factors and target genes might capture only a small fraction of the potential  
578 sources of *trans*-regulatory variation.

579  
580 Understanding the properties of *trans*-regulatory mutations is important because these  
581 mutations provide the raw material for natural *trans*-regulatory variation. We found that  
582 mutations affecting *P<sub>TDH3</sub>-YFP* expression were enriched in genomic regions associated with  
583 expression variation among wild isolates of *S. cerevisiae*, suggesting that mutational sources of  
584 regulatory variation have helped shape the sources of genetic variation affecting gene  
585 expression segregating in natural populations. Differences in the genomic distribution of new  
586 regulatory mutations and polymorphisms are presumably due to natural selection, which  
587 influences the evolutionary fate of new regulatory mutations based on their fitness  
588 consequences. The fitness consequences of *trans*-regulatory mutations include not only  
589 changes in growth rate caused by altering expression of the focal gene, but also their pleiotropic  
590 effects on activity of other genes. Ultimately, explaining the variation in gene expression we see  
591 in natural populations will require studies like this elucidating the mutational input as well as  
592 studies describing the fitness and pleiotropic effects of these mutations in native environments.

## 593 **Materials and methods**

594

### 595 *Mutant strains selected for mapping*

596

597 To identify mutations associated with expression changes, we selected 82 haploid mutant  
598 strains for bulk segregant analysis (Figure 1A) from three collections of mutants obtained in  
599 Gruber et al. (2012) and Metzger et al. (2016) via ethyl methanesulfonate (EMS) mutagenesis of  
600 two progenitor strains expressing a *YFP* reporter gene (Yellow Fluorescent Protein) under  
601 control of the *TDH3* promoter ( $P_{TDH3}$ -*YFP*). 71 mutants were selected from a collection of 1498  
602 lines founded from cells isolated randomly (unenriched) after mutagenesis in Metzger et al.  
603 (2016), 5 mutants were selected from 211 lines founded from cells enriched for fluorescence  
604 changes after mutagenesis in Metzger et al. (2016) and the last 6 mutants were selected from  
605 1064 lines founded from cells enriched for fluorescence changes in Gruber et al. (2012).  
606 Mutants from Metzger et al. (2016) were obtained by mutagenesis of the progenitor strain  
607 YPW1139 (*MAT $\alpha$  ura3d0*), while mutants from Gruber et al. (2012) were obtained by  
608 mutagenesis of the progenitor strain YPW1 (*MAT $\alpha$  ura3d0 lys2d0*). Both progenitors were  
609 derived from S288c genetic background (see Metzger et al. 2016 and Gruber et al. 2012 for  
610 details on construction of YPW1139 and YPW1 strains). In YPW1139,  $P_{TDH3}$ -*YFP* is inserted at  
611 the *ho* locus with a *KanMX* drug resistance marker. In YPW1,  $P_{TDH3}$ -*YFP* is inserted at position  
612 199270 on chromosome I near a pseudogene. YPW1139 harbors *RME1(ins-308A)* and  
613 *TAO3(1493Q)* alleles (Deutschbauer & Davis, 2005) that increase sporulation frequency relative  
614 to YPW1 alleles, as well as *SAL1*, *CAT5* and *MIP1* alleles that decrease the frequency of the  
615 petite phenotype (Dimitrov et al., 2009). We previously showed that the few genetic differences  
616 between YPW1 and YPW1139 did not affect the magnitude of effects of *TDH3* promoter  
617 mutations on fluorescence (Metzger et al., 2016). Fluorescence levels of the three collections  
618 were measured in Gruber et al. (2012) and in Metzger et al. (2016). From these data, we  
619 selected 39 mutants for BSA-Seq that showed statistically significant fluorescence changes  
620 greater than 1% relative to the progenitor strain. Among these mutants, 6 were selected from  
621 the Gruber et al. (2012) collection ( $Z$ -score  $> 2.58$ ,  $P < 0.01$ ), 5 were selected from mutants  
622 enriched for large effects in Metzger et al. (2016) (permutation test,  $P < 0.05$ ) and 28 were  
623 selected from unenriched mutants in Metzger et al. (2016) (permutation test,  $P < 0.05$ ). The  
624 remaining 43 mutants included in BSA-Seq experiments were selected from mutants in Metzger  
625 et al. (2016) for which we collected new fluorescence measures using flow cytometry. This  
626 second fluorescence screen included 197 lines from the unenriched collection that were chosen  
627 because they showed statistically significant fluorescence changes (permutation test,  $P < 0.05$ )  
628 greater than 1% relative to the progenitor strain in the initial screen published in Metzger et al.  
629 (2016). The 43 mutants selected from this 2<sup>nd</sup> screen showed statistically significant  
630 fluorescence changes (permutation test,  $P < 0.05$ ) greater than 1% relative to the progenitor  
631 strain.

632

### 633 *Measuring YFP expression by flow cytometry*

634

635 Fluorescence levels of mutant strains were quantified by flow cytometry using the same  
636 approach as described in Metzger et al. (2016) and Duveau et al. (2018). For assays involving



637 strains stored in individual tubes at -80°C, all strains were thawed in parallel on YPG plates (10  
638 g yeast extract, 20 g peptone, 50 ml glycerol, 20 g agar per liter) and grown for 2 days at 30°C.  
639 Strains were then arrayed using pipette tips in 96 deep well plates containing 0.5 ml of YPD  
640 medium (10 g yeast extract, 20 g peptone, 20 g D-glucose per liter) per well at positions defined  
641 in Supplementary File 11. The reference strain YPW1139 was inoculated at 20 fixed positions  
642 on each plate to correct for plate and position effects on fluorescence. The non-fluorescent  
643 strain YPW978 was inoculated in one well per plate to quantify the autofluorescence of yeast  
644 cells. Plates were incubated at 30°C for 20 hours with 250 rpm orbital shaking (each well  
645 contained a sterile 3 mm glass bead to maintain cells in suspension). Samples from each plate  
646 were then transferred to omnitrays containing YPG-agar using a V & P Scientific pin tool. For  
647 assays involving strains already arrayed in 96-well plates at -80°C (*i.e.* *RAP1* and *GCR1*  
648 mutants), strains were directly transferred on YPG omnitrays after thawing. After 48 hours of  
649 incubation at 30°C, samples from each omnitray were inoculated using the pin tool in four  
650 replicate 96-well plates containing 0.5 ml of YPD per well and cultivated at 30°C with 250 rpm  
651 shaking for 22 hours. Then, 15 µl of cell cultures were transferred to a 96-well plate with 0.5 ml  
652 of PBS per well (phosphate-buffered saline) and samples were immediately analyzed on a BD  
653 Accuri C6 flow cytometer connected to a HyperCyt autosampler (IntelliCyt Corp). A 488 nm  
654 laser was used for excitation and the YFP signal was acquired with a 530/30 optical filter. Each  
655 well was sampled for 2 seconds, yielding fluorescence and cell size measurements for at least  
656 5000 events per well. Flow cytometry data were analyzed using custom R scripts  
657 (Supplementary File 12) as described in Duveau et al. (2018). First, events that did not  
658 correspond to single cells were filtered out using *flowClust* clustering functions. Second,  
659 fluorescence intensity was scaled by cell size in several steps. For Figures 1B-D, these values  
660 of fluorescence relative to cell size were directly used for subsequent steps of the analysis. For  
661 other figures, these values were transformed using a log-linear function to be linearly related  
662 with YFP abundance. Transformations of fluorescence values were performed using the  
663 relationship between fluorescence levels and *YFP* mRNA levels established in Duveau et al.  
664 (2018) from five strains carrying mutations in the promoter of the *P<sub>TDH3</sub>-YFP* reporter gene. The  
665 *YFP* mRNA levels quantified in these five strains are expected to be linearly related with *YFP*  
666 protein abundance based on a previous study that compared mRNA and protein levels for a  
667 similar fluorescent protein (GFP) across a broad range of expression levels (Kafri et al., 2016).  
668 For this reason and because mutations recovered in this study may alter *YFP* expression at the  
669 post-transcriptional level, the transformed values of fluorescence were considered to provide  
670 estimates of *YFP* abundance instead of mRNA levels. The median expression among all cells of  
671 each sample was then corrected to account for positional effects estimated from a linear model  
672 applied to the median expression of the 20 control samples on each plate. To correct for  
673 autofluorescence, the mean of median expression measured among all replicate populations of  
674 the non-fluorescent strain was then subtracted from the median expression of each sample.  
675 Finally, a relative measure of expression was calculated by dividing the median expression of  
676 each sample by the mean of the median expression among replicates of the reference strain.  
677 Figures show the mean relative expression among the four replicate populations of each  
678 genotype. Permutation tests used to compare the expression level of each single site mutant to  
679 the expression level of the EMS mutant carrying the same mutation are described in the legend  
680 of Figure 2 - figure supplement 5A.



681

## 682 *Two-level permutation tests*

683

684 We developed a permutation-based approach to determine which EMS mutant strains from  
685 Metzger et al. (2016) showed a significant change in YFP expression relative to their progenitor  
686 strain. This permutation approach was motivated by the fact that Student tests and Mann-  
687 Whitney-Wilcoxon tests applied to these data appeared to be overpowered. Indeed, the flow  
688 cytometry assay from Metzger et al. (2016) included 146 instances of the progenitor strain  
689 YPW1139 that were placed at random plate positions and with fluorescence measured in four  
690 replicate populations for each position. When comparing the mean expression of the four  
691 replicate populations of YPW1139 grown at a given plate position to the mean expression of all  
692 other replicate populations of YPW1139, the  $P$ -value was below 0.05 in 25.3% of cases when  
693 using Student tests and in 13.7% of cases when using Mann-Whitney-Wilcoxon tests. The fact  
694 that more than 5% of  $P$ -values were below 0.05 indicated that the tests were overpowered,  
695 which was because expression differences between YPW1139 populations grown at different  
696 plate positions were in average larger than expression differences between replicate  
697 populations grown at the same position. For this reason, we compared the expression of each  
698 mutant strain to the expression of the 146 x 4 populations of the YPW1139 progenitor strain  
699 using permutation tests with two levels of resampling as described below. In these tests, we  
700 compared 10,000 times the expression levels of each tested strain measured in quadruplicates  
701 to the expression levels of YPW1139 measured in quadruplicates at a randomly selected plate  
702 position among the 146 available positions (a new position was picked at each iteration). For  
703 each iteration of the comparison, we calculated the difference  $D$  between 1) the absolute  
704 difference observed between the mean expression of the tested strain and the mean expression  
705 of YPW1139 and 2) a randomized absolute difference of mean expression between two sets of  
706 4 expression values obtained by random permutation of the 4 expression values measured for  
707 the tested strain and of the 4 expression values measured for YPW1139 at the selected plate  
708 position. Finally, for each tested strain the proportion of  $D$  values that were negative (after  
709 excluding  $D$  values equal to zero) corresponded to the  $P$ -value of the permutation test. When  
710 we applied this test to YPW1139 as a tested strain, we found that the  $P$ -value was below 0.05  
711 for 6.1% of the 146 plate positions containing YPW1139, indicating that the permutation test  
712 was not overpowered.

713

## 714 *BSA-Seq procedure*

715

716 To identify mutations associated with fluorescence levels in EMS-treated mutants, we used  
717 bulk-segregant analysis followed by Illumina sequencing (BSA-Seq). BSA-Seq data  
718 corresponding to the 6 mutants from Gruber et al. (2012) were collected together with the BSA-  
719 Seq dataset published in Duveau et al. (2014). For the other 76 mutants (from Metzger et al.,  
720 2016), BSA-Seq data were collected in this study in several batches (see Supplementary File  
721 13) using the experimental approach described in Duveau et al. (2014) (with few modifications).  
722 First, each EMS-treated mutant ( $MAT\alpha$  *ura3d0 ho::P<sub>TDH3</sub>-YFP ho::KanMX*) was crossed to the  
723 mapping strain YPW1240 ( $MAT\alpha$  *ura3d0 ho::P<sub>TDH3</sub>-YFP ho::NatMX4 mata2::yEmRFP-HygMX*)  
724 that contained the *FASTER MT* system from Chin et al. (2012) used to tag diploid and  $MAT\alpha$

725 cells with a fluorescent reporter. Crosses were performed on YPD agar plates and replica-plated  
726 on YPD + G418 + Nat medium (YPD agar with 350 mg/L geneticin (G418) and 100 mg/L  
727 Nourseothricin) to select diploid hybrids. After growth, cells were streaked on another YPD +  
728 G418 + Nat agar plate, one colony was patched on YPG agar for each mutant and the diploid  
729 strain was kept frozen at -80°C. Bulk segregant populations were then collected for batches of 8  
730 mutants in parallel as follows. Diploid strains were thawed and revived on YPG plates, grown for  
731 12 hours at 30°C on GNA plates (50 g D-glucose, 30 g Difco nutrient broth, 10 g yeast extract  
732 and 20 g agar per liter) and sporulation was induced for 4 days at room temperature on KAc  
733 plates (10 g potassium acetate and 20 g agar per liter). For each mutant, we then isolated a  
734 large population of random spores ( $> 10^8$  spores) by digesting tetrads with zymolyase, vortexing  
735 and sonicating samples in 0.02% triton-X (exactly as described in Duveau et al., 2014).  $\sim 3 \times 10^5$   
736 *MAT $\alpha$*  spores were sorted by FACS (BD FACSAria II) based on the absence of RFP  
737 fluorescence signal measured using a 561 nm laser and 582/15 optical filter. Spores were then  
738 resuspended in 2 ml of YPD medium. After 24 hours of growth at 30°C, 0.4 ml of cell culture  
739 was transferred to a 5 ml tube containing 2 ml of PBS. Three populations of  $1.5 \times 10^5$  segregant  
740 cells were then collected by FACS: 1) a low fluorescence population of cells sorted among the  
741 2.5% of cells with lowest fluorescence levels (“low bulk”), 2) a high fluorescence population of  
742 cells sorted among the 2.5% of cells with highest fluorescence levels (“high bulk”) and 3) a  
743 control population of cells sorted regardless of their fluorescence levels. YFP signal was  
744 measured using a 488 nm laser and a 530/30 optical filter. To exclude budding cells and enrich  
745 for single cells,  $\sim 70\%$  of all events were filtered out based on the area and width of the forward  
746 scatter signal prior to sorting. In addition, the median FSC.A (area of forward scatter, a proxy for  
747 cell size) was maintained to similar values in the low fluorescence bulk and in the high  
748 fluorescence bulk by drawing sorting gates that were parallel to the linear relationship between  
749 FSC.A and fluorescence intensity in the FACSDiva software. After sorting, cells were  
750 resuspended in 1.6 ml of YPD medium and grown for 30 hours at 30°C. Each sample was then  
751 stored at -80°C in 15% glycerol in two separate tubes: one tube containing 1 ml of culture (for  
752 DNA extraction) and one tube containing 0.5 ml of culture (for long-term storage). Extraction of  
753 genomic DNA was performed for 24 samples in parallel using a Gentra Puregene Yeast/Bact kit  
754 (Qiagen). Then, DNA libraries were prepared from 1 ng of genomic DNA using Nextera XT DNA  
755 Library Prep kits (Illumina) for low fluorescence bulks and for high fluorescence bulks (control  
756 populations were not sequenced). Tagmentation was carried out at 55°C for 5 minutes. Dual  
757 indexing of the libraries was achieved using index adapters provided in the Nextera XT Index kit  
758 (index sequences used for each library are indicated in Supplementary File 14). Final library  
759 purification and size selection was achieved using Agencourt AMPure XP beads (30  $\mu$ l of beads  
760 added to 50  $\mu$ l of PCR-amplified libraries followed by ethanol washes and resuspension in 50  $\mu$ l  
761 of Tris-EDTA buffer). The average size of DNA fragments in the final libraries was 650 bp, as  
762 quantified from a subset of samples using high sensitivity assays on a 2100 Bioanalyzer  
763 (Agilent). The concentration of all libraries was quantified with a Qubit 2.0 Fluorometer (Thermo  
764 Fisher Scientific) using dsDNA high sensitivity assays. Libraries to be sequenced in the same  
765 flow lane were pooled to equal concentration in a single tube and sequenced on a HiSeq4000  
766 instrument (Illumina) at the University of Michigan Sequencing Core Facility (150-bp paired-end  
767 sequencing). The 2 x 76 libraries were sequenced in 4 distinct sequencing runs (45300, 45301,  
768 54374 and 54375) that included 36 to 54 samples (libraries sequenced in each run are indicated

769 in Supplementary File 14). In addition, 4 control libraries were sequenced in run 45300,  
770 corresponding to genomic DNA from 1) YPW1139 progenitor strain, 2) YPW1240 mapping  
771 strain, 3) a bulk of low fluorescence segregants from YPW1139 x YPW1240 cross and 4) a bulk  
772 of high fluorescence segregants from YPW1139 x YPW1240 cross. 18 libraries sequenced in  
773 run 54374 were not analyzed in this study.

774

#### 775 *Analysis of BSA-Seq data*

776

777 Demultiplexing of sequencing reads and generation of FASTQ files were performed using  
778 Illumina *bcl2fastq* v1.8.4 for sequencing runs 45300 and 45301 and *bcl2fastq2* v2.17 for runs  
779 54374 and 54375. The next steps of the analysis were processed on the Flux cluster  
780 administered by the Advanced Research Computing Technology Services of the University of  
781 Michigan (script available in Supplementary File 15). First, low quality ends of reads were  
782 trimmed with *sickle* (<https://github.com/najoshi/sickle>) and adapter sequences were removed  
783 with *cutadapt* (Martin, 2011). Reads were then aligned to the S288c reference genome  
784 (<https://www.yeastgenome.org/>, R64-1-1 release to which we added the sequences  
785 corresponding to *P<sub>TDH3</sub>-YFP*, *KanMX* and *NatMX4* transgenes, available in Supplementary File  
786 11) using *bowtie2* (Langmead & Salzberg, 2012) and overlaps between paired reads were  
787 clipped using *clipOverlap* in *bamUtil* (<https://github.com/statgen/bamUtil>). The sequencing depth  
788 at each position in the genome was determined using *bedtools genomecov*  
789 (<https://github.com/arg5x/bedtools2>). For variant calling, BAM files corresponding to the low  
790 fluorescence bulk and to the high fluorescence bulk of each mutant were processed together  
791 using *freebayes* (<https://github.com/ekg/freebayes>; Garrison & Marth, 2012) with options --  
792 *pooled-discrete* --*pooled-continuous*. That way, sequencing data from both bulks were pooled to  
793 increase the sensitivity of variant calling and allele counts were reported separately for each  
794 bulk. To obtain a list of mutations present in each mutant strain, false positive calls in the VCF  
795 files generated by *freebayes* were then filtered out with the Bioconductor package  
796 *VariantAnnotation* in R (Supplementary File 16). Filtering was based on the values of several  
797 parameters such as quality of genotype inference (QUAL > 200), mapping quality (MQM > 27),  
798 sequencing depth (DP > 20), counts of reference and alternate alleles (AO > 3 and RO > 3),  
799 frequency of the reference allele (FREQ.REF > 0.1), proportion of reference and alternate  
800 alleles supported by properly paired reads (PAIRED > 0.8 and PAIREDR > 0.8), probability to  
801 observe the alternate allele on both strands (SAP < 100) and at different positions of the reads  
802 (EPP < 50 and RPP < 50). The values of these parameters were chosen to filter out a maximum  
803 number of calls while retaining 28 variants previously confirmed by Sanger sequencing. We  
804 then used likelihood ratio tests (*G*-tests) in R to determine for each variant site whether the  
805 frequency of the alternate allele (*i.e.* the mutation) was statistically different between the low  
806 fluorescence bulk and the high fluorescence bulk (Supplementary File 16). A point mutation was  
807 considered to be associated with fluorescence (directly or by linkage) if the *P*-value of the *G*-test  
808 was below 0.001, corresponding to a *G* value above 10.828. Since this *G*-test was performed  
809 for a total of 1819 mutations, we expected that 1.82 mutations would be associated with  
810 fluorescence due to type I error (false positives) at a *P*-value threshold of 0.001. This expected  
811 number of false positives was considered acceptable since it represented only 2.7% of all  
812 mutations that were associated with fluorescence. To determine if an aneuploidy was

813 associated with fluorescence level, we compared the sequencing coverage of the aneuploid  
814 chromosome to genome-wide sequencing coverage in the low and high fluorescence bulks  
815 using  $G$ -tests. The  $G$  statistics was computed from the number of reads mapping to the  
816 aneuploid chromosome and the number of reads mapping to the rest of the genome in the low  
817 and high fluorescence bulks. Aneuploidies with  $G > 10.828$ , which corresponds to  $P$ -value  $<$   
818  $0.001$ , were considered to be present at statistically different frequencies in both bulks. A  
819 custom R script was used to annotate all mutations identified in BSA-Seq data (Supplementary  
820 File 17), retrieving information about the location of mutations in intergenic, intronic or exonic  
821 regions, the name of genes affected by coding mutations or the name of neighboring genes in  
822 case of intergenic mutations and the expected impact on amino acid sequences (synonymous,  
823 nonsynonymous or nonsense mutation and identity of the new amino acid in case of a  
824 nonsynonymous mutation).

825

#### 826 *Sanger sequencing of candidate genes*

827

828 As an alternative approach to BSA-Seq, additional mutations were identified by directly  
829 sequencing candidate genes in a subset of EMS-treated mutants (Supplementary File 4). More  
830 specifically, we sequenced the  $P_{TDH3}$ - $YFP$  transgene in 95 mutant strains from Metzger et al.  
831 (2016) that showed decreased fluorescence by more than 10% relative to the progenitor strain.  
832 We sequenced the  $ADE4$  coding sequence in 14 mutants from Metzger et al. (2016) that were  
833 not included in the BSA-Seq assays and that showed increased fluorescence by more than 5%  
834 relative to the progenitor strain. Two of the sequenced mutants had a mutation in the  $ADE4$   
835 coding sequence. We then sequenced the  $ADE5$  coding sequence in the remaining 12 mutants  
836 and found a mutation in five of the sequenced mutants. We continued by sequencing the  $ADE6$   
837 coding sequence in the remaining seven mutants. Five of the sequenced mutants had a single  
838 mutation and one mutant had two mutations in the  $ADE6$  coding sequence. We sequenced the  
839  $ADE8$  coding sequence in the last mutant but we found no candidate mutation in this mutant.  
840 Finally, we sequenced the  $ADE2$  coding sequence in two mutants that showed a reddish color  
841 when growing on YPD plates. For all genes, the sequenced region was amplified by PCR from  
842 cell lysates, PCR products were cleaned up using Exo-AP treatment (7.5  $\mu$ l PCR product mixed  
843 with 0.5  $\mu$ l Exonuclease-I (NEB), 0.5  $\mu$ l Antarctic Phosphatase (NEB), 1  $\mu$ l Antarctic  
844 Phosphatase buffer and 0.5  $\mu$ l  $H_2O$  incubated at 37°C for 15 minutes followed by 80°C for 15  
845 minutes) and Sanger sequencing was performed by the University of Michigan Sequencing  
846 Core Facility. Oligonucleotides used for PCR amplification and sequencing are indicated in  
847 Supplementary File 14.

848

#### 849 *Site-directed mutagenesis*

850

851 34 mutations identified by BSA-Seq and 11 mutations identified by sequencing candidate genes  
852 were introduced individually in the genome of the progenitor strain YPW1139 to quantify the  
853 effect of these mutations on fluorescence level. “Scarless” genome editing (i.e. without insertion  
854 of a selection marker) was achieved using either the delitto perfetto approach from Stuckey et  
855 al. (2011) (for 19 mutations) or CRISPR-Cas9 approaches derived from Laughery et al. (2015)  
856 (for 26 mutations). Compared to delitto perfetto, CRISPR-Cas9 is more efficient and it can be



857 used to introduce mutations in essential genes. However, it requires specific sequences in the  
858 vicinity of the target mutation (see below). The technique used for the insertion of each mutation  
859 is indicated in Supplementary File 18. The sequences of oligonucleotides used for the insertion  
860 and the validation of each mutation can be found in Supplementary File 14.

861 In the delitto perfetto approach, the target site was first replaced by a cassette containing  
862 the *Ura3* and *hphMX4* selection markers (pop-in) and then this cassette was swapped with the  
863 target mutation (pop-out). The *Ura3-hphMX4* cassette was amplified from pCORE-UH plasmid  
864 using two oligonucleotides that contained at their 5' end 20 nucleotides for PCR priming in  
865 pCORE-UH and at their 3' end 40 nucleotides corresponding to the sequences flanking the  
866 target site in the yeast genome (for homologous recombination). The amplicon was transformed  
867 into YPW1139 cells using a classic LiAc/polyethylene glycol heat shock protocol (Gietz &  
868 Schiestl, 2007). Cells were then plated on synthetic complete medium lacking uracil (SC-Ura)  
869 and incubated for two days at 30°C. Colonies were replica-plated on YPD + Hygromycin B (300  
870 mg/l) plates. A dozen [Ura+ Hyg+] colonies were streaked on SC-Ura plates to remove residual  
871 parental cells and the resulting colonies were patched on YPG plates to counterselect petite  
872 cells. Cell patches were then screened by PCR to confirm the proper insertion of *Ura3-hphMX4*  
873 at the target site. One positive clone was grown in YPD and stored at -80°C in 15% glycerol. For  
874 the pop-out step, a genomic region of ~240 bp centered on the mutation was amplified from the  
875 EMS-treated mutant containing the desired mutation. The amplicon was transformed into the  
876 strain with *Ura3-hphMX4* inserted at the target site. Cells were plated on synthetic complete  
877 medium containing 0.9 g/l of 5-fluoroorotic acid (SC + 5-FOA) to counterselect cells expressing  
878 *Ura3*. After growth, a dozen [Ura-] colonies were streaked on SC + 5-FOA plates and one  
879 colony from each streak was patched on a YPG plate. Cell patches were screened by PCR  
880 using oligonucleotides that flanked the sequence of the transformed region and amplicons of  
881 expected size (~350 bp) were sequenced to confirm the insertion of the desired mutation and  
882 the absence of PCR-induced mutations. When possible two independent clones were stored at -  
883 80°C in 15% glycerol, but in some cases only one positive clone could be retrieved and stored.

884 A "one-step" CRISPR-Cas9 approach was used to insert mutations impairing a NGG or  
885 CCN motif in the genome (22 mutations), which corresponds to the protospacer adjacent motif  
886 (PAM) targeted by Cas9. First, a DNA fragment containing the 20 bp sequence upstream of the  
887 target PAM in the yeast genome was cloned between *Swa*I and *Bcl*II restriction sites in the  
888 pML104 plasmid. This DNA fragment was obtained by hybridizing two oligonucleotides  
889 designed as described in Laughery *et al.* 2015. The resulting plasmid contained cassettes for  
890 expression of *Ura3*, Cas9 and a guide RNA targeted to the mutation site in yeast cells. In  
891 parallel, a repair fragment containing the mutation was obtained either by PCR amplification of a  
892 ~240 bp genomic region centered on the mutation in the EMS-treated mutant or by hybridization  
893 of two complementary 70 mer oligonucleotides containing the mutation and its flanking genomic  
894 sequences. The Cas9/sgRNA plasmid and the repair fragments were transformed together  
895 (~150 nmol of plasmid + 20 μmol of repair fragment) into the progenitor strain YPW1139 using  
896 LiAc/polyethylene glycol heat shock protocol (Gietz & Schiestl, 2007). Cells were then plated on  
897 SC-Ura medium and incubated at 30°C for 48 hours. This medium selected cells that both  
898 internalized the plasmid and integrated the desired mutation in their genome. Indeed, cells with  
899 the Cas9/sgRNA plasmid stop growing as long as their genomic DNA is cleaved by Cas9 but  
900 their growth can resume once the PAM sequence is impaired by the mutation, which is

901 integrated into the genome via homologous recombination with the repair fragment (Laughery et  
902 al., 2015). A dozen [Ura<sup>+</sup>] colonies were then streaked on SC-Ura plates and one colony from  
903 each streak was patched on a YPG plate. Cell patches were screened by PCR using  
904 oligonucleotides that flanked the mutation site and amplicons of expected size (~350 bp) were  
905 sequenced to confirm the insertion of the desired mutation and the absence of secondary  
906 mutations. Then, one or two positive clones were patched on SC + 5-FOA to counterselect the  
907 Cas9/sgRNA plasmid, grown in YPD and stored at -80°C in 15% glycerol.

908 A “two-steps” CRISPR-Cas9 approach was used to insert mutations located near but  
909 outside a PAM sequence (4 mutations). Each step was performed as described above for the  
910 “one-step” CRISPR-Cas9 approach. In the first step, Cas9 was targeted by the sgRNA to a  
911 PAM sequence (the initial PAM) located close to the mutation site (up to 20 bp). The repair  
912 fragment contained two synonymous mutations that were not the target mutation: one mutation  
913 that impaired the initial PAM and one mutation that introduced a new PAM as close as possible  
914 to the target site. This repair fragment was obtained by hybridization of two complementary 90  
915 mer oligonucleotides and transformed into YPW1139. In the second step, Cas9 was targeted to  
916 the new PAM. The repair fragment contained three mutations: two mutations that reverted the  
917 mutations introduced in the first step and the target mutation. This repair fragment was obtained  
918 by hybridization of two complementary 90 mer oligonucleotides and transformed into the strain  
919 obtained in the first step. Positive clones were sequenced to confirm the insertion of the target  
920 mutation and the absence of other mutations.

921 We used CRISPR/Cas9-guided allele replacement to introduce individual mutations in  
922 five codons of the *RAP1* coding sequence that encode for amino acids predicted to make direct  
923 contact with DNA when RAP1 binds to DNA (Konig et al., 1996). For each codon, we tried to  
924 insert one synonymous mutation, one nonsynonymous mutation predicted to have a weak  
925 impact on RAP1 protein structure and one nonsynonymous mutation predicted to have a strong  
926 impact on RAP1 protein structure based on amino acid exchangeability scores from Yampolsky  
927 & Stoltzfus (2005) (see Supplementary File 7 for the list of mutations). Each mutation was  
928 introduced in the genome of strain YPW2706. This strain is derived from YPW1139 and  
929 contains two identical sgRNA target sites upstream and downstream of the *RAP1* gene (see  
930 below for details on YPW2706 construction). Therefore, we could use a single Cas9/sgRNA  
931 plasmid to excise the entire *RAP1* gene in YPW2706 by targeting Cas9 to both ends of the  
932 gene. We used gene SOEing (Splicing by Overlap Extension) to generate repair fragments  
933 corresponding to the *RAP1* gene (promoter and coding sequence) with each target mutation.  
934 First, a left fragment of *RAP1* was amplified from YPW1139 genomic DNA using a forward 20  
935 mer oligonucleotide priming upstream of the RAP1 promoter and a reverse 60 mer  
936 oligonucleotide containing the target mutation and the surrounding *RAP1* sequence. In parallel,  
937 a right fragment of RAP1 overlapping with the right fragment was amplified from YPW1139  
938 genomic DNA using a forward 60 mer oligonucleotide complementary to the reverse  
939 oligonucleotide used to amplify the left fragment and a reverse 20 mer oligonucleotide priming in  
940 *RAP1* 5'UTR sequence. Then, equimolar amounts of the left and right fragments were mixed in  
941 a PCR reaction and 25 cycles of PCR were performed to fuse both fragments. Finally, the  
942 resulting product was further amplified using two 90 mer oligonucleotides with homology to the  
943 sequence upstream of *RAP1* promoter and to the *RAP1* 5'UTR but without the sgRNA target  
944 sequences. Consequently, transformation of the repair fragment together with the Cas9/sgRNA



945 plasmid in YPW2706 cells was expected to replace the wild type allele of *RAP1* by an allele  
946 containing the target mutation in *RAP1* coding sequence and without the two flanking sgRNA  
947 target sites. For each of the 15 target mutations, we sequenced the *RAP1* promoter and coding  
948 sequence in 10 independent clones obtained after transformation. All synonymous mutations  
949 were retrieved in several clones, while several of the nonsynonymous mutations were not found  
950 in any clone, suggesting they were lethal (Supplementary File 7).

951  
952 *RAP1 and GCR1 mutagenesis using error-prone PCR*

953  
954 We used a mutagenic PCR approach to efficiently generate hundreds of mutants with random  
955 mutations in the *RAP1* gene (promoter and coding sequence) or in the second exon of *GCR1*  
956 (representing 99.7% of *GCR1* coding sequence). DNA fragments obtained from the mutagenic  
957 PCR were introduced in the yeast genome using CRISPR/Cas9-guided allele replacement as  
958 described above. The sequences of all oligonucleotides used for *RAP1* and *GCR1* mutagenesis  
959 can be found in Supplementary File 14.

960 First, we constructed two yeast strains for which the *RAP1* gene (strain YPW2706) or  
961 the second exon of *GCR1* (strain YPW3082) were flanked by identical sgRNA target sites and  
962 PAM sequences. To generate strain YPW2706, we first identified a sgRNA target site located  
963 downstream of the *RAP1* coding sequence (41 bp after the stop codon in the 5'UTR) in the  
964 S288c genome. Then, we inserted the 23 bp sequence corresponding to this sgRNA target site  
965 and PAM upstream of the *RAP1* promoter (immediately after *PPN2* stop codon) in strain  
966 YPW1139 using the delitto perfetto approach (as described above). To generate strain  
967 YPW3082, we first identified a sgRNA target site located at the end of the *GCR1* intron (22 bp  
968 upstream of exon 2) in the S288c genome. Then, we inserted the 23 bp sequence  
969 corresponding to this sgRNA target site and PAM immediately after the *GCR1* stop codon in  
970 strain YPW1139 using the delitto perfetto approach (as described above).

971 Second, we constructed plasmid pPW437 by cloning the 20mer guide sequence directed  
972 to *RAP1* in pML104 as described in Laughery *et al.* 2015 and we constructed plasmid pPW438  
973 by cloning the 20mer guide sequence directed to *GCR1* in pML104 as described in Laughery *et*  
974 *al.* 2015. These two sgRNA/Cas9 plasmids can be used, respectively, to excise the *RAP1* gene  
975 or *GCR1* exon 2 from the genomes of YPW2706 and YPW3082.

976 Third, we generated repair fragments with random mutations in *RAP1* or *GCR1* genes  
977 using error-prone PCR. We first amplified each gene from 2 ng of YPW1139 genomic DNA  
978 using a high-fidelity polymerase (KAPA HiFi DNA polymerase) and 30 cycles of PCR. PCR  
979 products were purified with the Wizard SV Gel and PCR Clean-Up System (Promega) and  
980 quantified with a Qubit 2.0 Fluorometer (Thermo Fisher Scientific) using dsDNA broad range  
981 assays. 2 ng of purified PCR products were used as template for a first round of mutagenic PCR  
982 and mixed with 25  $\mu$ l of DreamTaq Master Mix 2x (ThermoFisher Scientific), 2.5  $\mu$ l of forward  
983 and reverse primers at 10  $\mu$ M, 5  $\mu$ l of 1 mM dATP and 5  $\mu$ l of 1 mM dTTP in a final volume of 50  
984  $\mu$ l. The imbalance of dNTP concentrations (0.3  $\mu$ M dATP, 0.2  $\mu$ M dCTP, 0.2  $\mu$ M dGTP and 0.3  
985  $\mu$ M dTTP) was done to bias the mutagenesis toward misincorporation of dATP and dTTP. For  
986 *RAP1* mutagenesis, the forward oligonucleotide primed upstream of the *RAP1* promoter (in  
987 *PPN2* coding sequence) and the reverse oligonucleotide primed in the *RAP1* terminator and  
988 contained a mutation in the PAM adjacent to the sgRNA target site. For *GCR1* mutagenesis, the

989 forward oligonucleotide primed at the end of the *GCR1* intron and contained a mutation in the  
990 PAM adjacent to the sgRNA target site and the reverse primer primed in the *GCR1* terminator.  
991 The PCR program was 95°C for 3 minutes followed by 32 cycles with 95°C for 30 seconds,  
992 52°C for 30 seconds, 72°C for 2 minutes and a final extension at 72°C for 5 minutes. For *RAP1*  
993 mutagenesis, the product of the first mutagenic PCR was diluted by a factor of 33 and used as  
994 template for a second round of mutagenic PCR (1.5 µl of product in a 50 µl reaction) similar to  
995 the first round but with only 10 cycles of amplification. For *GCR1* mutagenesis, the product of  
996 the first mutagenic PCR was diluted by a factor of 23 and used as template for a second round  
997 of mutagenic PCR (2.2 µl of product in a 50 µl reaction) with 35 cycles of amplification. Using  
998 this protocol, we expected to obtain on average 1.6 mutations per fragment for *RAP1*  
999 mutagenesis and 1.8 mutations per fragment for *GCR1* mutagenesis (see below for calculations  
1000 of these estimates).

1001 pPW437 was transformed with *RAP1* repair fragments into YPW2706 and pPW438 was  
1002 transformed with *GCR1* repair fragments into YPW3082 as described above for CRISPR/Cas9  
1003 site directed mutagenesis. To select cells that replaced the wild type alleles with alleles  
1004 containing random mutations, transformed cells were plated on SC-Ura and incubated at 30°C  
1005 for 48 hours. To confirm the success of each mutagenesis and to estimate actual mutation  
1006 rates, we then sequenced the *RAP1* genes in 27 random colonies from the *RAP1* mutagenesis  
1007 and we sequenced the second exon of *GCR1* in 18 random colonies from the *GCR1*  
1008 mutagenesis. Next, 500 colonies from *RAP1* mutagenesis and 300 colonies from *GCR1*  
1009 mutagenesis were streaked onto SC-Ura plates. After growth, one colony from each streak was  
1010 patched on YPG and grown four days at 30°C. Then, patches were replica-plated with velvets  
1011 onto SC + 5-FOA to eliminate sgRNA/Cas9 plasmids. Finally, 488 clones from *RAP1*  
1012 mutagenesis and 355 clones from *GCR1* mutagenesis were arrayed in 96-well plates containing  
1013 0.5 ml of YPD (same plate design as used for the flow cytometry assays) and grown overnight  
1014 at 30°C. 0.2 ml of cell culture from each well was then mixed with 46 µl of 80% glycerol in 96-  
1015 well plates and stored at -80°C. The fluorescence of these strains was quantified by flow  
1016 cytometry as described above to assess the impact of *RAP1* and *GCR1* mutations on *P<sub>TDH3</sub>-*  
1017 *YFP* expression (expression data for each mutant can be found in Supplementary File 19).

1018 In our mutagenesis approach, we introduced a mutation that impaired the target PAM  
1019 sequence in all *RAP1* and *GCR1* mutants. To determine the effect of this mutation alone, we  
1020 generated strains YPW2701 and YPW2732 that carried the PAM mutation in the *RAP1*  
1021 terminator or in the *GCR1* intron, respectively, without any other mutation in *RAP1* or *GCR1*.  
1022 The fluorescence level of these two strains was not significantly different from the fluorescence  
1023 level of the progenitor strain YPW1139 in flow cytometry assays.

1024

#### 1025 *Estimation of RAP1 and GCR1 mutation rates*

1026

1027 The expected number of mutations per PCR amplicon ( $N_{mut}$ ) depends on the error rate  
1028 of the Taq polymerase ( $\mu$ ), on the number of DNA duplications ( $D$ ) and on the length of the  
1029 amplicon ( $L$ ):  $N_{mut} = \mu \cdot D \cdot L$ . The published error rate for a classic polymerase similar to  
1030 DreamTaq is  $\sim 3 \times 10^{-5}$  errors per nucleotide per duplication (McInerney *et al.* 2014). Amplicon  
1031 length was 3057 bp for *RAP1* mutagenesis and 2520 pb for *GCR1* mutagenesis. The number of  
1032 duplications of PCR templates was calculated from the amounts of double stranded DNA

1033 quantified using Qubit 2.0 dsDNA assays before ( $I$ ) and after ( $O$ ) each mutagenic PCR reaction  
1034 as follows:  $D = \ln\left(\frac{O}{I}\right) \div \ln 2$ . For the first round of *RAP1* mutagenesis,  $D = \ln\left(\frac{6550}{1.93}\right) \div \ln 2 =$   
1035 11.7. For the second round of *RAP1* mutagenesis,  $D = \ln\left(\frac{3000}{68.1}\right) \div \ln 2 = 5.5$ . Therefore, the  
1036 total number of duplications was 17.2 and the expected number of mutations per amplicon  $N_{mut}$   
1037 was 1.6 on average. For the first round of *GCR1* mutagenesis,  $D = \ln\left(\frac{6870}{2.15}\right) \div \ln 2 = 11.6$ . For  
1038 the second round of *GCR1* mutagenesis,  $D = \ln\left(\frac{6535}{1.65}\right) \div \ln 2 = 12.0$ . Therefore, the total  
1039 number of duplications was 23.6 and the expected number of mutations per amplicon  $N_{mut}$  was  
1040 1.8 on average.

#### 1041 *Effects of mutations in purine biosynthesis genes on expression from different promoters*

1042  
1043  
1044 We compared the individual effects of three mutations in the purine biosynthesis pathway  
1045 (*ADE2-C1477a*, *ADE5-G1715a* and *ADE6-G3327a*) on YFP expression driven by four different  
1046 yeast promoters ( $P_{TDH3}$ ,  $P_{RNR1}$ ,  $P_{STM1}$  and  $P_{GPD1}$ ). Each mutation was introduced individually in  
1047 the genomes of four parental strains described in Hodgins-Davis et al. (2019) carrying either  
1048  $P_{TDH3}$ -YFP (YPW1139),  $P_{RNR1}$ -YFP (YPW3758),  $P_{STM1}$ -YFP (YPW3764) or  $P_{GPD1}$ -YFP  
1049 (YPW3757) reporter gene at the *ho* locus. Site-directed mutagenesis was performed as  
1050 described in the corresponding section (see above). The fluorescence of the four parental  
1051 strains, of a non-fluorescent strain (YPW978) and of the 12 mutant strains (4 reporter genes x 3  
1052 mutations) was quantified using a Sony MA-900 flow cytometer (the BD Accuri C6 instrument  
1053 used for other fluorescence assays was not available due to Covid-19 shutdown) in three  
1054 replicate experiments performed on different days. For each experiment, all strains were grown  
1055 in parallel in culture tubes containing 5 ml of YPD and incubated at 30°C for 16 hours. Each  
1056 sample was diluted to  $1-2 \times 10^7$  cells/mL in PBS prior to measurement. At least  $5 \times 10^4$  events  
1057 were recorded for each sample using a 488 nm laser for YFP excitation and a 525/50 optical  
1058 filter for the acquisition of fluorescence. At least  $5 \times 10^4$  events were recorded for each sample.  
1059 Flow cytometry data were then processed in R using functions from the *FlowCore* package and  
1060 custom scripts available in Supplementary File 12. After log-transformation of flow data, events  
1061 considered to correspond to single cells were selected on the basis of their forward scatter  
1062 height and width (FSC-H and FSC-W). Fluorescence values of single cells were then  
1063 normalized to account for differences in cell size. Finally, the median fluorescence among cells  
1064 was computed for each sample and averaged across replicates of each genotype.

#### 1065 1066 *Statistical comparisons of trans-regulatory and nonregulatory mutations*

1067  
1068 We established a set of 69 *trans*-regulatory mutations that included 52 mutations with a *P*-value  
1069 below 0.01 in the *G*-tests comparing the frequencies of mutant and reference alleles in low and  
1070 high fluorescence bulks (see above) as well as 17 mutations identified by Sanger sequencing in  
1071 the coding sequence of purine biosynthesis genes. In parallel, we established a set of 1766  
1072 nonregulatory mutations regarding  $P_{TDH3}$ -YFP expression that included mutations with a *P*-value  
1073 above 0.01 in the *G*-tests comparing the frequencies of mutant and reference alleles in low and  
1074 high fluorescence bulks (see above) and mutations that did not affect  $P_{TDH3}$ -YFP expression in

1075 single-site mutants. We performed statistical analysis to compare properties of *trans*-regulatory  
1076 and nonregulatory mutations using RStudio v1.2.5019 (R scripts are in Supplementary File 16).  
1077 We used *G*-tests (*likelihood.ratio* function in *Deducer* package) to compare the following  
1078 properties between *trans*-regulatory and nonregulatory mutations: i) the frequency of G:C to A:T  
1079 transitions, ii) the frequency of indels, iii) the frequency of aneuploidies, iv) the distribution of  
1080 mutations among chromosomes, v) the frequency of mutations in coding, intronic and intergenic  
1081 sequences, vi) the frequency of synonymous, nonsynonymous and nonsense changes among  
1082 coding mutations, vii) the frequency of coding mutations in transcription factors, viii) the  
1083 frequency of coding mutations in the predicted *TDH3* regulatory network (see below), ix) the  
1084 proportion of mutations in eQTL regions (see below). We used resampling tests to compare the  
1085 frequencies of different amino acid changes caused by *trans*-regulatory and nonregulatory  
1086 mutations in coding sequences. We computed for each possible amino acid change the  
1087 observed absolute difference between i) the proportion of coding *trans*-regulatory mutations  
1088 causing the amino acid change and ii) the proportion of nonregulatory mutations causing the  
1089 amino acid change. Then, we computed similar absolute differences for 10,000 randomly  
1090 permuted sets of *trans*-regulatory and nonregulatory mutations. The *P*-value for each amino  
1091 acid change was calculated as the proportion of resampled absolute differences greater or  
1092 equal to the observed absolute difference.

1093

#### 1094 *TDH3* regulatory network

1095

1096 The network of potential *TDH3* regulators shown on Figure 4 was established using data  
1097 available in July 2019 on the YEASTRACT ([www.yeasttract.com](http://www.yeasttract.com)) repository of regulatory  
1098 associations between transcription factors and target genes in *Saccharomyces cerevisiae*  
1099 (Teixeira et al., 2018). We used the tool “Regulation Matrix” to obtain three matrices in which  
1100 rows corresponded to the 220 transcription factor genes in YEASTRACT and columns  
1101 corresponded to the 6886 yeast target genes included in the database. In the first matrix  
1102 obtained using the option “Only DNA binding evidence”, an element had a value of 1 if the  
1103 transcription factor at the corresponding row was reported in the literature to bind to the  
1104 promoter of the target gene at the corresponding column and a value of 0 otherwise. The two  
1105 other matrices were obtained using the option “Only Expression evidence” with either “TF acting  
1106 as activator” or “TF acting as inhibitor”. An element had a value of 1 only in the “TF acting as  
1107 activator” matrix if perturbation of the transcription factor at the corresponding row was reported  
1108 to increase expression of the target gene at the corresponding column. An element had a value  
1109 of 1 only in the “TF acting as inhibitor” matrix if perturbation of the transcription factor at the  
1110 corresponding row was reported to decrease expression of the target gene at the corresponding  
1111 column. An element had a value of 1 in both matrices if perturbation of the transcription factor at  
1112 the corresponding row was reported to affect expression of the target gene at the corresponding  
1113 column in an undetermined direction. Finally, an element had a value of 0 in both matrices if  
1114 perturbation of the transcription factor at the corresponding row was not reported to alter  
1115 expression of the target gene at the corresponding column in the literature. We then used a  
1116 custom R script (Supplementary File 16) to generate a smaller matrix that only contained first  
1117 level and second level regulators of *TDH3* and *TDH3* itself. A transcription factor was  
1118 considered to be a first level regulator of *TDH3* if a regulatory association with *TDH3* was



1119 supported both by DNA binding evidence and expression evidence. A transcription factor was  
1120 considered to be a second level regulator of *TDH3* if a regulatory association with a first level  
1121 regulator of *TDH3* was supported both by DNA binding evidence and expression evidence. The  
1122 network shown on Figure 4 was drawn using Adobe Illustrator based on regulatory interactions  
1123 included in the matrix of *TDH3* regulators (in Supplementary File 11). To determine whether  
1124 mutations in the *TDH3* regulatory network constituted a significant mutational source of  
1125 regulatory variation affecting  $P_{TDH3}$  activity, we compared the proportions of *trans*-regulatory and  
1126 non-regulatory mutations that were located in a *TDH3* regulator gene (first or second level)  
1127 using a *G*-test (*likelihood.ratio* function in R package *Deducer*).

1128

### 1129 *Competitive fitness assays*

1130

1131 We performed competitive growth assays to quantify the fitness of 62 strains with random  
1132 mutations in the second exon of *GCR1*. These 62 strains corresponded to all *GCR1* mutants  
1133 that showed a significant decrease of  $P_{TDH3}$ -*YFP* expression as quantified by flow cytometry as  
1134 well as *GCR1* mutants for which *GCR1* exon 2 was sequenced and the location of mutations  
1135 was known. The 62 strains were thawed on YPG plates as well as reference strains YPW1139  
1136 and YPW2732 and strain YPW1182 that expressed a GFP (Green Fluorescent Protein) reporter  
1137 instead of YFP. After three days of incubation at 30°C, strains were arrayed in four replicate 96-  
1138 well plates containing 0.5 ml of YPG per well. In parallel, the [GFP+] strain YPW1182 was also  
1139 arrayed in four replicate 96-well plates. The eight plates were incubated on a wheel at 30°C for  
1140 32 hours. We then measured the optical density at 620 nm of all samples using a Sunrise plate  
1141 reader (Tecan) and calculated the average cell density for each plate. Samples were then  
1142 transferred to 1.2 ml of YPD in 96-well plates to reach an average cell density of 10<sup>6</sup> cells/ml for  
1143 each plate. 21.25 µl of samples from plates containing [YFP+] strains were mixed with 3.75 µl of  
1144 [GFP+] samples in four 96-well plates containing 0.45 ml of YPD per well. The reason why  
1145 [YFP+] and [GFP+] strains were mixed to a 17:3 ratio is because we anticipated that some of  
1146 the *GCR1* mutants may grow slower than the [GFP+] competitor in YPD. Samples were then  
1147 grown on a wheel at 30°C for 10 hours and the optical density was measured again after growth  
1148 to estimate the average number of generations for each plate. The ratio of [YFP+] and [GFP+]  
1149 cells in each sample was quantified by flow cytometry before and after the 10 hours of growth.  
1150 Samples were analyzed on a BD Accuri C6 flow cytometer with a 488 nm laser used for  
1151 excitation and two different optical filters (510/10 and 585/40) used to separate YFP and GFP  
1152 signals. FCS data were analyzed with custom R scripts using *flowCore* and *flowClust* packages  
1153 (Supplementary File 12) as described in Duveau et al. (2018). First, we filtered out artifactual  
1154 events with extreme values of forward scatter or fluorescence intensity. Then, for each sample  
1155 we identified two clusters of events corresponding to [YFP+] and [GFP+] cells using a principal  
1156 component analysis on the logarithms of FL1.H and FL2.H (height of the fluorescence signal  
1157 captured through the 510/10 and 585/40 filters, respectively). Indeed, [YFP+] cells tend to have  
1158 lower FL1.H value and higher FL2.H value than [GFP+] cells and these two parameters are  
1159 positively correlated. The competitive fitness of [YFP+] cells relative to [GFP+] cells was  
1160 calculated as the exponential of the slope of the linear regression of  $\log_e \left( \frac{YFP}{GFP} \right)$  on the number of  
1161 generations of growth (where *YFP* corresponds to the number of [YFP+] cells and *GFP*  
1162 corresponds to the number of [GFP+] cells). We then divided the fitness of each sample by the

1163 mean fitness among all replicates of the reference strain YPW1139 to obtain a fitness value  
1164 relative to YPW1139. The fitness of each strain was calculated as the mean relative fitness  
1165 among the four replicate populations for that strain. These fitness data can be found in  
1166 Supplementary File 19.

1167  
1168 *Gene ontology (GO) analysis*

1169  
1170 GO term analyses were performed on [www.pantherdb.org](http://www.pantherdb.org) website in June 2020 (Mi et al.,  
1171 2019). In “Gene List Analysis”, we used “Statistical overrepresentation test” on a query list  
1172 corresponding to the 53 genes affected by *trans*-regulatory coding mutations. GO enrichment  
1173 was determined based on a reference list of the 1251 genes affected by non-regulatory coding  
1174 mutations using Fisher’s exact tests. Four separate analyses were performed for GO biological  
1175 processes, GO molecular functions, GO cellular components and PANTHER pathways. GO  
1176 terms that are significantly enriched in the list of *trans*-regulatory mutations (mutations  
1177 associated with fluorescence level) relative to non-regulatory mutations (mutations not  
1178 associated with fluorescence level) at  $P < 0.05$  are listed in Supplementary File 8.

1179  
1180 *Enrichment of mutations in eQTL regions*

1181  
1182 Genomic regions containing expression quantitative trait loci (eQTL) associated with  $P_{TDH3}$ -YFP  
1183 expression variation in three different crosses (BYxYPS1000, BYxSK1 and BYxM22) were  
1184 obtained from Table S11 in Metzger & Wittkopp (2019). A custom R script was used to  
1185 determine the number of *trans*-regulatory and non-regulatory mutations located inside and  
1186 outside these eQTL intervals (Supplementary File 16).  $G$ -tests were performed to determine  
1187 whether the proportion of *trans*-regulatory mutations in eQTL intervals was statistically different  
1188 from the proportion of non-regulatory mutations in the same eQTL intervals.

## 1189 **Figure legends**

1190  
1191 **Figure 1. Mutant strains analyzed with altered expression of a  $P_{TDH3}$ -YFP reporter gene.**  
1192 **(A)** Summary of the three previously published collections of *S. cerevisiae* mutants obtained by  
1193 ethyl methanesulfonate (EMS) mutagenesis of a haploid strain expressing a yellow fluorescent  
1194 protein (YFP) under control of the *TDH3* promoter. \*One mutant is included in both columns  
1195 because it was analyzed both by BSA-Seq and Sanger sequencing. **(B-D)** Previously published  
1196 fluorescence levels (x-axis) and statistical significance of the difference in median fluorescence  
1197 between each mutant and the un-mutagenized progenitor strain (y-axis) are shown for mutants  
1198 analyzed in **(B)** Gruber et al. (2012) and **(C,D)** Metzger et al. (2016). **(B)** Collection of 1064  
1199 mutants from Gruber et al. (2012) enriched for mutations causing large fluorescence changes.  
1200  $P$ -values were computed using  $Z$ -tests in this study, based on one measure of fluorescence for  
1201 each mutant and 30 measures of fluorescence for the progenitor strain. **(C)** Collection of 211  
1202 mutants from Metzger et al. (2016) enriched for mutations causing large fluorescence changes.  
1203 **(D)** Collection of 1498 mutants from Metzger et al. (2016) obtained irrespective of their  
1204 fluorescence levels (unenriched mutants). **(E)** A new fluorescence dataset for 197 unenriched



1205 mutants from Metzger et al. (2016) (blue in panel D) that were reanalyzed in a 2<sup>nd</sup> screen as  
1206 part of this study. **(C-E)** 4 replicate populations were analyzed for each mutant. Error bars show  
1207 95% confidence intervals of fluorescence levels measured among these replicates. *P*-values  
1208 were obtained using the permutation tests described in Methods. **(B-E)** Mutants analyzed by  
1209 BSA-Seq are highlighted in red. All of these mutants showed fluorescence changes greater than  
1210 0.01 (vertical dotted lines) and *P*-value below 0.05 (horizontal dotted lines); percentages of all  
1211 mutants that met these selection criteria in each collection are also shown. Mutants selected for  
1212 Sanger sequencing of the *ADE4*, *ADE5*, and/or *ADE6* candidate genes are highlighted in green.  
1213 The mutant analyzed with both BSA-seq and Sanger sequencing is both red and green in panel  
1214 C). Two mutants selected for Sanger sequencing of the *ADE2* gene are highlighted in purple,  
1215 one in **D** and one in **E**.  
1216

1217 **Figure 2. Genetic mapping and functional testing of *trans*-regulatory mutations affecting**  
1218 ***P<sub>TDH3</sub>-YFP* expression. (A-C)** Overview of the BSA-Seq approach. **(A)** Each mutant was  
1219 crossed with an un-mutagenized strain of opposing mating type expressing the *P<sub>TDH3</sub>-YFP*  
1220 reporter gene. After meiosis of the resulting diploid cells, a large population of random spores  
1221 was collected. Stars indicate hypothetical mutations. **(B)** Two bulks of ~1.5 x 10<sup>5</sup> segregant cells  
1222 were sorted by fluorescence-activated cell sorting (FACS): a low fluorescence bulk of cells with  
1223 2.5% lowest fluorescence levels among all segregants and a high fluorescence bulk of cells with  
1224 2.5% highest fluorescence levels among all segregants. Average cell size was controlled to be  
1225 similar between the two bulks (see Methods). **(C)** Genomic DNA extracted from each bulk was  
1226 sequenced at high coverage (> 75x) to identify mutations present in each mutant and to  
1227 estimate the frequencies of mutant alleles in each bulk. A mutation without effect on  
1228 fluorescence is expected to be found at similar frequencies in the two bulks (white stars). A  
1229 mutation affecting fluorescence or genetically linked to a mutation affecting fluorescence is  
1230 expected to be found at different frequencies between the two bulks (red stars). Statistical  
1231 differences of allele frequencies between the two bulks were determined using *G*-tests. **(D)**  
1232 Type of mutations identified in BSA-Seq data for the 76 mutants from Metzger et al. (2016). **(E)**  
1233 Disentangling the effects of linked mutations using single-site mutants. Median expression of  
1234 the YFP reporter is shown for 5 EMS mutants (brown) with two linked mutations associated with  
1235 fluorescence in BSA-Seq data. Expression of the YFP reporter is also shown for 10 single-site  
1236 mutants (turquoise), each carrying one of the two linked mutations in these 5 EMS mutants, as  
1237 well as the wild-type (WT) progenitor strain (black). Single-site mutants are grouped in pairs  
1238 next to the EMS mutant carrying the same mutations and are named after the gene that they  
1239 affect. Expression levels are expressed relative to the wild-type progenitor strain. For each  
1240 strain, dots represent the median expression measured for each replicate population and tick  
1241 marks represent the mean of median expression from replicate populations. **(F)** Effects of  
1242 mutations associated with fluorescence in BSA-Seq experiments tested in single-site mutants.  
1243 X-axis: Effect of each mutation on expression measured in a single site mutant and relative to  
1244 the wild-type progenitor strain. Error bars are 95% confidence intervals obtained from at least 4  
1245 replicate populations. Y-axis: *G* statistics of the tests used to compare the frequencies of each  
1246 mutation between the two bulks in BSA-Seq experiments, with a negative sign if the mutation  
1247 was more frequent in the low fluorescence bulk and a positive sign if the mutation was more  
1248 frequent in the high fluorescence bulk. One single-site mutant (*NAP1*, red) showed no

1249 significant change in expression relative to the wild-type progenitor strain ( $t$ -test,  $P$ -value >  
1250 0.05); the mutation it carries is therefore considered to be a false positive in the BSA-seq data.  
1251 For the remaining 29 mutations tested in single-site mutants, effects on expression were in the  
1252 same direction as predicted by the signed  $G$ -value in all but two cases (*ATP23* and *IRA2*,  
1253 green). **(G)** Comparing  $P_{TDH3}$ -*YFP* expression levels in single-site mutants and in EMS mutants  
1254 sharing the same mutation. Data points represent median expression levels of 40 EMS mutants  
1255 (x-axis) and 40 single-site mutants (y-axis) measured by flow cytometry in four replicate  
1256 populations. Circles: mutations identified by BSA-Seq. Triangles: mutations identified by  
1257 sequencing candidate genes. Error bars: 95% confidence intervals of expression levels  
1258 obtained from replicate populations. Data points are colored based on the  $P$ -values of  
1259 permutation tests used to assess the statistical significance of expression differences between  
1260 each single site mutant and the EMS mutant carrying the same mutation (see Figure 2 - figure  
1261 supplement 5 for details). The light blue area represents the 95% confidence interval of  
1262 expression differences between genetically identical samples across the whole range of median  
1263 expression values. This confidence interval was calculated from a null distribution described in  
1264 Figure 2 - figure supplement 5A. **(E-G)** Expression levels are expressed on a scale linearly  
1265 related to *YFP* mRNA levels and relative to the median expression of the wild-type progenitor  
1266 strain (see Methods).

1267  
1268 **Figure 2 - figure supplement 1. Number of mutations per strain identified from BSA-Seq**  
1269 **data.** Data from 76 EMS mutants from Metzger et al. (2016) are shown. Vertical dotted line:  
1270 mean number of mutations per strain (23.9). Blue dots and line: Poisson distribution with  $\lambda =$   
1271 23.9 and  $k = 76$  representing the expected numbers of mutations per line if mutations had the  
1272 same probability of occurring in all mutant lines.

1273  
1274 **Figure 2 - figure supplement 2. Magnitude of expression changes in EMS mutants**  
1275 **depending on the number of mutations associated with fluorescence in BSA-Seq**  
1276 **experiments.** Individual data points represent absolute differences between the median  
1277 expression levels of EMS mutants and of the un-mutagenized progenitor strain averaged among  
1278 four replicate populations. Mutations that were associated with fluorescence only because of  
1279 genetic linkage (i.e., without additional evidence of affecting expression) were not counted (see  
1280 Supplementary File 3). Blue dots: mutants with decreased expression relative to the progenitor  
1281 strain. Red dots: mutants with increased expression relative to the progenitor strain. Using  
1282 Mann-Whitney-Wilcoxon tests, the magnitude of expression changes was found to be  
1283 significantly lower for mutants without any mutation associated with fluorescence than for  
1284 mutants with 1 ( $P = 5.3 \times 10^{-5}$ ) or 2 ( $P = 0.018$ ) mutations associated with fluorescence.

1285  
1286 **Figure 2 - figure supplement 3. Relationship between the number of mutations per EMS**  
1287 **mutant strain and the absolute expression change relative to the progenitor strain.** This  
1288 relationship is shown for EMS mutants without any mutation associated with fluorescence in  
1289 BSA-Seq data (green dots and green regression line) as well as for EMS mutants with at least  
1290 one mutation associated with fluorescence in BSA-Seq data (gray dots and gray regression  
1291 line). Mutations that were associated with fluorescence only because of genetic linkage and  
1292 without other evidence of affecting expression were excluded (see Supplementary File 3).  $F$ -

1293 tests were used to assess the statistical significance of linear regressions. A significant  
1294 relationship was observed between the number of mutations per mutant strain and the absolute  
1295 expression change only when no mutation was associated with fluorescence ( $r^2 = 0.127$ ,  $P$ -  
1296 value = 0.03). This observation supports the hypothesis that several mutations with small effects  
1297 could collectively contribute to the expression change observed in mutants for which no  
1298 mutation was associated with fluorescence. The small effects of these mutations would explain  
1299 why they were not associated with fluorescence in the BSA-Seq analyses.

1300

1301 **Figure 2 - figure supplement 4. Effects of individual mutations in purine biosynthesis**  
1302 **genes on YFP expression levels differ among promoters.** Each dot indicates the median  
1303 fluorescence level of at least  $5 \times 10^4$  cells for each genotype averaged across 3 experimental  
1304 replicates. Error bars represent median absolute deviation across replicates. Dots are grouped  
1305 along the x-axis based on the yeast promoter used to drive YFP expression ( $P_{GPD1}$ ,  $P_{RNR1}$ ,  $P_{STM1}$   
1306 and  $P_{TDH3}$ ), with “None” corresponding to the autofluorescence measured in a strain without a  
1307 fluorescent reporter gene. The color of each dot indicates which mutation was introduced in one  
1308 of the genes involved in *de novo* purine synthesis ( $ADE2$ ,  $ADE5$  or  $ADE6$ ), with the specific  
1309 mutation introduced indicated in the key. The goal of this experiment was to determine whether  
1310 the regulatory mutations identified in purine synthesis genes altered  $P_{TDH3}$ -YFP expression at  
1311 the transcriptional or post-transcriptional level. If the mutations acted post-transcriptionally, their  
1312 effect on fluorescence level should be the same among strains with different promoters driving  
1313 YFP expression because they all produce the same YFP transcript. However, we observed that  
1314 the mutations in purine synthesis genes increased fluorescence level when YFP expression was  
1315 driven by the  $TDH3$  or the  $GPD1$  promoter but not when YFP expression was driven by the  
1316  $RNR1$  or the  $STM1$  promoter, indicating that the effects of these mutations on YFP expression  
1317 were promoter specific.

1318

1319 **Figure 2 - figure supplement 5. Factors contributing to expression differences observed**  
1320 **between EMS and single-site mutants.** (A) Distribution of absolute expression differences  
1321 observed between EMS and single-site mutants (bars). To assess the statistical significance of  
1322 these expression differences, we estimated the magnitude of expression differences expected  
1323 to arise by chance between genetically identical strains grown at different positions of a 96-well  
1324 plate (red line). This null distribution was obtained from the differences in expression measured  
1325 for 10,440 pairs of the un-mutagenized progenitor strain grown at different well positions in four  
1326 replicate populations. We next randomly permuted  $10^5$  times the expression values between i)  
1327 each pair of EMS and single-site mutants and ii) random pairs of the progenitor strain to  
1328 calculate the one-sided  $p$ -value for each pair of mutants (*i.e.* the proportion of randomized  
1329 expression differences greater than the observed expression difference). After Benjamini-  
1330 Hochberg correction for multiple testing, we found that the expression difference between the  
1331 single-site mutant and the EMS mutant carrying the same mutation was statistically significant  
1332 (adjusted  $p$ -value < 0.05) for 14 out of the 40 pairs of mutants (35%, red and blue bars), but  
1333 highly significant (adjusted  $p$ -value < 0.01) for only 1 pair (2.5%, red bar). Because mutant  
1334 strains were exposed to the same micro-environmental and technical variation as the control  
1335 samples used to establish the null distribution, these sources of variation are unlikely to explain  
1336 the significant differences of expression observed between EMS and single-site mutants.

1337 Panels **B-F** test three other hypotheses to explain expression differences observed between  
1338 single-site and EMS mutants. **(B)** Hypothesis 1: expression differences between EMS and  
1339 single-site mutants are explained by differences in expression noise (*i.e.* the variability of  
1340 expression observed among genetically identical cells grown in the same environment) among  
1341 mutants. To test this hypothesis, we compared the expression noise measured by flow  
1342 cytometry for each EMS mutant (x-axis) to the absolute difference of median expression levels  
1343 between this EMS mutant and the corresponding single-site mutant (y-axis). We observed no  
1344 significant correlation between the two parameters ( $r = 0.06$ ,  $P$ -value = 0.71), indicating that  
1345 expression noise is unlikely to explain expression differences between EMS and single-site  
1346 mutants. Expression noise was calculated for each sample as the standard deviation of  
1347 expression among cells divided by the median expression and it is reported as the average  
1348 value among 4 replicate populations relative to the expression noise of the wild-type progenitor  
1349 strain. Dot colors:  $P$ -values as shown in panel A. Dot shapes: circles represent mutations  
1350 identified by BSA-seq; triangles represent mutations identified by sequencing candidate genes.  
1351 Error bars: 95% confidence intervals calculated from 4 replicate populations. **(C-D)** Hypothesis  
1352 2: expression differences between EMS and single-site mutants are explained by additional  
1353 mutations present in the EMS mutants. **(C)** Testing effects of additional mutations associated  
1354 with fluorescence: boxplot comparing the magnitude of expression differences when only one  
1355 mutation was associated with fluorescence and when more than one mutation was associated  
1356 with fluorescence in BSA-Seq experiments. The fact that no statistical difference was observed  
1357 between the two classes (Mann-Whitney-Wilcoxon test,  $P = 0.192$ ) suggests that expression  
1358 differences between EMS and single-site mutants were not likely to be caused by additional  
1359 mutations associated with fluorescence in the BSA-Seq data. **(D)** Testing effects of additional  
1360 mutations with statistical support for an association with fluorescence below the significance  
1361 threshold. Expression difference between EMS and single-site mutants (x-axis) was compared  
1362 to the highest  $G$ -value that was below our significance threshold for considering a mutation to  
1363 be associated with fluorescence in the BSA-Seq data from each mutant (y-axis). A significant  
1364 correlation was observed between the two parameters (Pearson's  $r = 0.48$ ;  $P = 0.02$ ),  
1365 suggesting that some mutations with associations below our detection threshold in the BSA-Seq  
1366 experiments might contribute to expression differences observed between EMS and single-site  
1367 mutants. Dots represent individual pairs of EMS and single-site mutants sharing the same  
1368 mutation (with random jitter). The red line represents the linear regression of the y-axis  
1369 parameter on the x-axis parameter. **(E-F)** Hypothesis 3: expression differences between EMS  
1370 and single-site mutants are explained by secondary mutation(s) or epigenetic changes that  
1371 occurred during construction of single-site mutants. To test this hypothesis, we isolated two  
1372 independent clones for 26 single-site mutants after transformation of the progenitor strain and  
1373 measured the expression difference between the two clones. **(E)** A positive correlation was  
1374 observed between the expression difference between EMS and single-site mutants (x-axis) and  
1375 the expression difference between the two independent clones for each single-site mutant (y-  
1376 axis). This positive correlation indicates that mutations with larger expression differences  
1377 between the single-site and EMS mutants tended to also show larger expression differences  
1378 between independent transformants. Dot colors:  $P$ -values as shown in panel A. **(F)** Boxplot also  
1379 showed that the average magnitude of expression differences between independent clones was  
1380 higher for single site mutants with a statistically significant expression difference between the



1381 single-site and EMS mutant sharing the same mutation (Mann-Whitney-Wilcoxon test,  $P =$   
1382 0.008). Results from E and F suggest that secondary mutation(s) and/or epigenetic changes  
1383 that unintentionally occurred in some of the single-site mutant clones likely contributed to  
1384 expression differences between some EMS and single-site mutants. It is important to  
1385 emphasize, however, that these expression differences were small in magnitude and that  
1386 overall the expression level of single-site mutants was strongly correlated with the expression  
1387 level of EMS mutants (Figure 3).  
1388

1389 **Figure 3. Contrasting properties of *trans*-regulatory and non-regulatory mutations. (A)**  
1390 Proportions of different types of mutations in a set of 1766 non-regulatory mutations (blue) and  
1391 in a set of 69 *trans*-regulatory mutations (orange). Numbers of mutations are indicated above  
1392 bars. **(B)** Distributions of non-regulatory and *trans*-regulatory point mutations along the yeast  
1393 genome. 1766 non-regulatory mutations are shown in blue, 44 *trans*-regulatory mutations that  
1394 were identified from the collections of unenriched mutants in Metzger et al. (2016) are shown in  
1395 red and 22 *trans*-regulatory mutations that were identified from the collections of mutants  
1396 enriched for large expression changes in Gruber et al. (2012) and in Metzger et al. (2016) are  
1397 shown in green. **(C)** Proportions of non-regulatory (left) and *trans*-regulatory (right) mutations  
1398 affecting either coding sequences, introns or intergenic regions. **(D)** Proportions of coding non-  
1399 regulatory (left) and coding *trans*-regulatory (right) mutations that either introduce an early stop  
1400 codon (nonsense), that substitute one amino acid for another (nonsynonymous) or that do not  
1401 change the amino acid sequence (synonymous). **(E)** Frequency of all possible amino acid  
1402 changes induced by *trans*-regulatory mutations as compared to non-regulatory mutations. Each  
1403 entry of the table represents the difference of frequency (percentage) between non-regulatory  
1404 and *trans*-regulatory mutations that are changing the amino acid shown on the y-axis into the  
1405 amino acid shown on the x-axis. For instance, the -6 on the first row indicates that the  
1406 proportion of mutations changing an Alanine into a Threonine is 6% lower among *trans*-  
1407 regulatory mutations than among non-regulatory mutations. Shades of red: amino acid changes  
1408 underrepresented in the set of *trans*-regulatory mutations. Shades of green: amino acid  
1409 changes overrepresented in the set of *trans*-regulatory mutations. White: amino acid changes  
1410 equally represented in the *trans*-regulatory and non-regulatory sets of mutations. Grey: amino  
1411 acid changes not observed in the sets of *trans*-regulatory and non-regulatory mutations. **(B-E)**  
1412 The three aneuploidies were excluded for these plots. **(D,E)** Non-coding mutations were  
1413 excluded for these plots.  
1414

1415 **Figure 3 - figure supplement 1. Distributions of *trans*-regulatory and non-regulatory**  
1416 **mutations among chromosomes.** 1766 non-regulatory mutations are shown in blue and 69  
1417 *trans*-regulatory mutations are shown in orange, among which 47 mutations were identified from  
1418 the collections of unenriched mutants in Metzger et al. (2016) (shown in red) and 23 *trans*-  
1419 regulatory mutations were identified from the collections of mutants enriched for large  
1420 expression changes in Gruber et al. (2012) and in Metzger et al. (2016) (shown in green).  
1421 *Trans*-regulatory mutations were significantly enriched on chromosome VII that contained the  
1422 purine biosynthesis genes *ADE5* and *ADE6* in which several mutations were identified (24.3%  
1423 of *trans*-regulatory mutations located on chromosome VII vs 9.3% of non-regulatory mutations;  
1424  $G$ -test,  $P = 3.4 \times 10^{-4}$ ). *Trans*-regulatory mutations were also enriched on chromosome XIII that



1425 contained the purine synthesis gene *ADE4*, although this enrichment was not statistically  
1426 significant (13.0% of *trans*-regulatory mutations located on chromosome XIII vs 7.8% of non-  
1427 regulatory mutations; *G*-test,  $P = 0.15$ ).

1428

1429 **Figure 3 - figure supplement 2. Statistical significance of the enrichment and depletion of**  
1430 **amino acid changes induced by *trans*-regulatory mutations.** Permutations tests were used  
1431 to assess the statistical significance of the frequency differences between non-regulatory and  
1432 *trans*-regulatory mutations shown on Figure 3E. Each number represents the negative logarithm  
1433 (base-10) of the *P*-value obtained using a permutation test to compare the frequency of  
1434 changing the amino acid on the y-axis to the amino acid shown on the x-axis between non-  
1435 regulatory and *trans*-regulatory mutations. Green color intensity scales with the negative  
1436 logarithm of *P*-values. White: amino acid changes equally represented in the *trans*-regulatory  
1437 and non-regulatory sets of mutations. Grey: amino acid changes not observed in the sets of  
1438 *trans*-regulatory and non-regulatory mutations.

1439

1440 **Figure 4. Mutations mapping to a predicted *TDH3* regulatory network.** The network of  
1441 inferred interactions between *TDH3* and transcription factors regulating its expression was  
1442 established using the YEASTRACT repository (Teixeira et al., 2018). First level regulators (dark  
1443 grey boxes) are transcription factors with evidence of binding to the *TDH3* promoter and  
1444 regulating its expression. Second level regulators (light grey boxes) are transcription factors with  
1445 evidence of binding to the promoter of at least one first level regulator and regulating its  
1446 expression. Green arrows: evidence for activation of expression. Red arrows: evidence for  
1447 inhibition of expression. Black arrows: unknown direction of regulation. Non-regulatory and  
1448 *trans*-regulatory mutations identified in the network are represented by blue and orange stars,  
1449 respectively, near the affected genes. *ROX1*, inferred to be a third level regulator, is also shown  
1450 because a *trans*-regulatory mutation was identified in its coding sequence.

1451

1452 **Figure 5. Impact of mutations in two direct regulators of the *TDH3* promoter. (A)**  
1453 Schematics of the  $P_{TDH3}$ -*YFP* reporter gene with locations of three known binding sites for  
1454 transcription factors Rap1p (purple) and Gcr1p (green) shown in the *TDH3* promoter. **(B)**  
1455 Regions of *RAP1* (purple) and *GCR1* (green) genes that were subjected to random  
1456 mutagenesis using error-prone PCR. 470 *RAP1* mutants and 220 *GCR1* mutants were obtained  
1457 by integration of random PCR fragments at the native *RAP1* or *GCR1* loci using CRISPR/Cas9  
1458 allelic replacement. **(C-D)** Distributions of the number of mutations per strain identified by  
1459 Sanger sequencing the mutated regions of **(C)** *RAP1* in 27 strains or **(D)** *GCR1* in 18 strains.  
1460 These data are shown in histograms. Blue curves: Poisson distribution with the same mean as  
1461 observed in data. Red dotted line: Mean number of mutations among sequenced strains. **(E-F)**  
1462 Distributions of  $P_{TDH3}$ -*YFP* expression changes relative to the un-mutagenized reporter strain  
1463 measured in four replicate samples for **(E)** the 470 *RAP1* mutants or **(F)** the 220 *GCR1* mutants.  
1464 Fluorescence measures were transformed to be linearly related with *YFP* mRNA levels (see  
1465 Methods). Red bars: Mutants with significant decrease in median expression greater than 3%  
1466 relative to the un-mutagenized strain (permutation test,  $P < 0.05$ ). Blue bars: Mutants with  
1467 significant increase in median expression greater than 3% relative to the un-mutagenized strain  
1468 (permutation test,  $P < 0.05$ ). Pie charts: Proportions of mutants with significant increase in

1469 expression (blue), significant decrease in expression (red) and no significant change in  
1470 expression (gray) relative to the un-mutagenized strain. **(G)** Relationship between changes in  
1471  $P_{TDH3}$ -YFP expression levels (x-axis) and fitness (y-axis) measured in 62 *GCR1* mutants.  
1472 Expression changes and fitness are both expressed relative to the un-mutagenized strain. Gray  
1473 dotted lines: Expression change and fitness of the un-mutagenized strain. Error bars: 95%  
1474 confidence intervals of expression changes and fitness measures obtained from four replicate  
1475 populations of each mutant. The black dotted line represents a LOESS regression of fitness on  
1476 median expression with a smoothing parameter of 1 and 95% confidence intervals of the  
1477 estimates shown as a gray shaded area.

1478

1479 **Figure 6. Properties of genes with coding mutations altering  $P_{TDH3}$ -YFP expression level.**

1480 **(A)** Proportion of genes with one or more mutations identified among EMS mutants. Mutations  
1481 in intergenic regions were excluded from this analysis. Orange bars include genes harboring  
1482 one or more of the 65 *trans*-regulatory mutations identified in coding sequences. Blue bars  
1483 include genes harboring one or more of 65 non-regulatory mutations randomly chosen among  
1484 the set of 1095 non-regulatory mutations observed in coding sequences. The number of genes  
1485 hit by 1 to 8 mutations is indicated above the corresponding bar. For blue bars, this number  
1486 represents the mean number of genes obtained from 1000 random sets of 65 non-regulatory  
1487 mutations. The names of genes with at least 2 *trans*-regulatory mutations identified among  
1488 mutants are indicated above the bars. *FTR1* and *CCC2* are involved in iron homeostasis,  
1489 *ADE2,4,5,6* are involved in *de novo* purine biosynthesis, *NAM7* is involved in nonsense  
1490 mediated mRNA decay, *CHD1* is involved in chromatin regulation and *TYE7* encodes a  
1491 transcription factor regulating *TDH3* expression. **(B)** Summary of gene ontology (GO)  
1492 enrichment analysis performed with PANTHER tool (<http://www.pantherdb.org/>). Fisher's exact  
1493 tests were used to evaluate the overrepresentation of GO terms among the 42 genes affected  
1494 by one or more of the 66 *trans*-regulatory mutations in coding sequences relative to the 1043  
1495 genes affected by one or more of the 1251 non-regulatory mutations in coding sequences. The  
1496 descriptions shown on the left correspond to GO terms with a *P* value < 0.05 (left bars), a fold-  
1497 enrichment > 3 (right bars) and that are not parents to other GO terms in the ontology hierarchy  
1498 (*i.e.* GO terms that are the most specific). A more complete list of enriched GO terms can be  
1499 found in Supplementary File 8. Shades of gray represent different categories of GO terms (from  
1500 darkest to lightest: biological processes, molecular functions and cellular components) or  
1501 PANTHER pathways (lightest gray). Fold-enrichment was calculated as the observed number of  
1502 genes with a particular GO term in the set of genes affected by *trans*-regulatory mutations (bold  
1503 numbers on the right) divided by an expected number of genes obtained from the number of  
1504 genes with the same GO term in the set of genes affected by non-regulatory mutations (regular  
1505 numbers on the right). Four groups of GO terms and pathways involved in similar processes are  
1506 represented by colored areas: chromatin (pink), metabolism (orange), transcription (green) and  
1507 iron homeostasis (blue).

1508

1509 **Figure 7. Overrepresentation of *trans*-regulatory mutations in eQTLs regions. (A)** Overlap

1510 of 66 *trans*-regulatory point mutations and 317 eQTL regions along the yeast genome. eQTL  
1511 regions were identified by BSA-Seq in Metzger and Wittkopp 2019 from three crosses of a  
1512 laboratory strain (BY) to each of three strains expressing  $P_{TDH3}$ -YFP in the genetic background

1513 of different *S. cerevisiae* isolates: SK1 (eQTL regions represented by blue bars), YPS1000  
1514 (eQTL regions represented by yellow bars) and M22 (eQTL regions represented by red bars).  
1515 Triangles indicate the genomic locations of *trans*-regulatory mutations, with open triangles  
1516 representing mutations identified in mutants from the unenriched collection and filled triangles  
1517 representing mutations identified in mutants enriched for large effects. Triangles are colored  
1518 depending on the overlap between mutations and eQTL regions: black if the mutation is outside  
1519 of any eQTL region, blue if the mutation lies in an eQTL region only identified from SK1xBY,  
1520 yellow if the mutation lies in an eQTL region only identified from YPS1000xBY, red if the  
1521 mutation lies in an eQTL region only identified from M22xBY, green if the mutation lies in two  
1522 overlapping eQTL regions identified from SK1xBY and YPS1000xBY, purple if the mutation lies  
1523 in two overlapping eQTL regions identified from SK1xBY and M22xBY, orange if the mutation  
1524 lies in two overlapping eQTL regions identified from M22xBY and YPS1000xBY and brown if the  
1525 mutation lies in three overlapping eQTL regions identified from the three crosses. **(B)**  
1526 Proportions of non-regulatory and *trans*-regulatory mutations located in eQTL regions. Black  
1527 bars: proportions of sites among the 12.07 Mb yeast genome. Blue bars: proportions of the  
1528 1759 non-regulatory point mutations. Orange bars: proportions of the 66 *trans*-regulatory  
1529 mutations (excluding aneuploidies). Red bars: proportions of the 44 *trans*-regulatory mutations  
1530 identified in mutants from the unenriched collection. Green bars: proportions of the 22 *trans*-  
1531 regulatory mutations identified in mutants enriched for large effects. The proportions of non-  
1532 regulatory and *trans*-regulatory mutations in eQTL regions were compared using *G*-tests (\*\*\*:  $P$   
1533  $< 0.001$ , \*\*:  $0.001 < P < 0.01$ , \*:  $0.01 < P < 0.05$ , ns:  $P > 0.05$ ).

## 1534 **Data archiving**

1535 Deposition of data (FASTQ files and FCS files) on public repositories is in progress. Sequencing  
1536 data (FASTQ files) will be available on NCBI SRA (<https://www.ncbi.nlm.nih.gov/sra>). Flow  
1537 cytometry data (FCS files) will be available on the Flow Repository (<https://flowrepository.org/>).

## 1538 **Acknowledgments**

1539 We thank Gaël Yvert and Mark Hill for helpful comments on the manuscript, the University of  
1540 Michigan sequencing core and University of Michigan flow cytometry core for research support,  
1541 and the National Institutes of Health (R01GM108826 and R35GM118073 to P.J.W.), European  
1542 Molecular Biology Organization (EMBO ALTF 1114-2012 to F.D.), National Science Foundation  
1543 (MCB-1929737 to P.J.W.), NIH Genetics Training grant (T32GM007544 to P.V.Z.), NIH  
1544 Genome Sciences Training Grant (T32HG000040 to B.P.H.M and M.A.S.), and the Michigan  
1545 Life Sciences Fellow program (M.A.S.) for funding.

1546

## 1547 **References**

1548  
1549 Albert, Frank W., & Kruglyak, L. (2015). The role of regulatory variation in complex traits and

- 1550 disease. *Nature Reviews. Genetics*, 16(4), 197-212. <https://doi.org/10.1038/nrg3891>
- 1551 Albert, Frank Wolfgang, Bloom, J. S., Siegel, J., Day, L., & Kruglyak, L. (2018). Genetics of  
1552 trans-regulatory variation in gene expression. *eLife*, 7, e35471.  
1553 <https://doi.org/10.7554/eLife.35471>
- 1554 Barbeira, A. N., Dickinson, S. P., Bonazzola, R., Zheng, J., Wheeler, H. E., Torres, J. M.,  
1555 Torstenson, E. S., Shah, K. P., Garcia, T., Edwards, T. L., Stahl, E. A., Huckins, L. M.,  
1556 Nicolae, D. L., Cox, N. J., & Im, H. K. (2018). Exploring the phenotypic consequences of  
1557 tissue specific gene expression variation inferred from GWAS summary statistics. *Nature*  
1558 *Communications*, 9(1), 1825. <https://doi.org/10.1038/s41467-018-03621-1>
- 1559 Bhate, M., Wang, X., Baum, J., & Brodsky, B. (2002). Folding and Conformational  
1560 Consequences of Glycine to Alanine Replacements at Different Positions in a Collagen  
1561 Model Peptide. *Biochemistry*, 41(20), 6539-6547. <https://doi.org/10.1021/bi020070d>
- 1562 Capece, A., Romaniello, R., Siesto, G., & Romano, P. (2012). Diversity of *Saccharomyces*  
1563 *cerevisiae* yeasts associated to spontaneously fermenting grapes from an Italian “heroic  
1564 vine-growing area”. *Food Microbiology*, 31(2), 159-166.  
1565 <https://doi.org/10.1016/j.fm.2012.03.010>
- 1566 Chin, B. L., Frizzell, M. A., Timberlake, W. E., & Fink, G. R. (2012). FASTER MT : Isolation of  
1567 Pure Populations of  $\alpha$  and  $\alpha$  Ascospores from *Saccharomyces cerevisiae*. *G3: Genes,*  
1568 *Genomes, Genetics*, 2(4), 449-452. <https://doi.org/10.1534/g3.111.001826>
- 1569 Clifton, D., Weinstock, S. B., & Fraenkel, D. G. (1978). Glycolysis mutants in *Saccharomyces*  
1570 *cerevisiae*. *Genetics*, 88(1), 1-11.
- 1571 Consortium, T. Gte. (2020). The GTEx Consortium atlas of genetic regulatory effects across  
1572 human tissues. *Science*, 369(6509), 1318-1330.  
1573 <https://doi.org/10.1126/science.aaz1776>
- 1574 Costanzo, M., VanderSluis, B., Koch, E. N., Baryshnikova, A., Pons, C., Tan, G., Wang, W.,

- 1575 Usaj, M., Hanchard, J., Lee, S. D., Pelechano, V., Styles, E. B., Billmann, M., Leeuwen,  
1576 J. van, Dyk, N. van, Lin, Z.-Y., Kuzmin, E., Nelson, J., Piotrowski, J. S., ... Boone, C.  
1577 (2016). A global genetic interaction network maps a wiring diagram of cellular function.  
1578 *Science*, 353(6306). <https://doi.org/10.1126/science.aaf1420>
- 1579 Deutschbauer, A. M., & Davis, R. W. (2005). Quantitative trait loci mapped to single-nucleotide  
1580 resolution in yeast. *Nature Genetics*, 37(12), 1333-1340. <https://doi.org/10.1038/ng1674>
- 1581 Dimitrov, L. N., Brem, R. B., Kruglyak, L., & Gottschling, D. E. (2009). Polymorphisms in Multiple  
1582 Genes Contribute to the Spontaneous Mitochondrial Genome Instability of  
1583 *Saccharomyces cerevisiae* S288C Strains. *Genetics*, 183(1), 365-383.  
1584 <https://doi.org/10.1534/genetics.109.104497>
- 1585 Duveau, F., Hodgins-Davis, A., Metzger, B. P., Yang, B., Tryban, S., Walker, E. A., Lybrook, T.,  
1586 & Wittkopp, P. J. (2018). Fitness effects of altering gene expression noise in  
1587 *Saccharomyces cerevisiae*. *eLife*, 7, e37272. <https://doi.org/10.7554/eLife.37272>
- 1588 Duveau, F., Metzger, B. P. H., Gruber, J. D., Mack, K., Sood, N., Brooks, T. E., & Wittkopp, P. J.  
1589 (2014). Mapping Small Effect Mutations in *Saccharomyces cerevisiae* : Impacts of  
1590 Experimental Design and Mutational Properties. *G3: Genes, Genomes, Genetics*, 4(7),  
1591 1205-1216. <https://doi.org/10.1534/g3.114.011783>
- 1592 Featherstone, D. E., & Broadie, K. (2002). Wrestling with pleiotropy : Genomic and topological  
1593 analysis of the yeast gene expression network. *BioEssays: News and Reviews in*  
1594 *Molecular, Cellular and Developmental Biology*, 24(3), 267-274.  
1595 <https://doi.org/10.1002/bies.10054>
- 1596 Ferraro, N. M., Strober, B. J., Einson, J., Abell, N. S., Aguet, F., Barbeira, A. N., Brandt, M.,  
1597 Bucan, M., Castel, S. E., Davis, J. R., Greenwald, E., Hess, G. T., Hilliard, A. T.,  
1598 Kember, R. L., Kotis, B., Park, Y., Peloso, G., Ramdas, S., Scott, A. J., ... Battle, A.  
1599 (2020). Transcriptomic signatures across human tissues identify functional rare genetic  
1600 variation. *Science*, 369(6509). <https://doi.org/10.1126/science.aaz5900>



- 1601 Flint, J., & Ideker, T. (2019). The great hairball gambit. *PLOS Genetics*, *15*(11), e1008519.  
1602 <https://doi.org/10.1371/journal.pgen.1008519>
- 1603 Gamazon, E. R., Segrè, A. V., van de Bunt, M., Wen, X., Xi, H. S., Hormozdiari, F., Ongen, H.,  
1604 Konkashbaev, A., Derks, E. M., Aguet, F., Quan, J., Nicolae, D. L., Eskin, E., Kellis, M.,  
1605 Getz, G., McCarthy, M. I., Dermitzakis, E. T., Cox, N. J., & Ardlie, K. G. (2018). Using an  
1606 atlas of gene regulation across 44 human tissues to inform complex disease- and trait-  
1607 associated variation. *Nature Genetics*, *50*(7), 956-967. [https://doi.org/10.1038/s41588-](https://doi.org/10.1038/s41588-018-0154-4)  
1608 [018-0154-4](https://doi.org/10.1038/s41588-018-0154-4)
- 1609 Garrison, E., & Marth, G. (2012). Haplotype-based variant detection from short-read  
1610 sequencing. *arXiv:1207.3907 [q-bio]*. <http://arxiv.org/abs/1207.3907>
- 1611 Gavin, A.-C., Bösch, M., Krause, R., Grandi, P., Marzioch, M., Bauer, A., Schultz, J., Rick, J.  
1612 M., Michon, A.-M., Cruciat, C.-M., Remor, M., Höfert, C., Schelder, M., Brajenovic, M.,  
1613 Ruffner, H., Merino, A., Klein, K., Hudak, M., Dickson, D., ... Superti-Furga, G. (2002).  
1614 Functional organization of the yeast proteome by systematic analysis of protein  
1615 complexes. *Nature*, *415*(6868), 141-147. <https://doi.org/10.1038/415141a>
- 1616 Gietz, R. D., & Schiestl, R. H. (2007). High-efficiency yeast transformation using the LiAc/SS  
1617 carrier DNA/PEG method. *Nature Protocols*, *2*(1), 31-34.  
1618 <https://doi.org/10.1038/nprot.2007.13>
- 1619 Gruber, J. D., Vogel, K., Kalay, G., & Wittkopp, P. J. (2012). Contrasting Properties of Gene-  
1620 Specific Regulatory, Coding, and Copy Number Mutations in *Saccharomyces*  
1621 *cerevisiae*: Frequency, Effects, and Dominance. *PLOS Genetics*, *8*(2), e1002497.  
1622 <https://doi.org/10.1371/journal.pgen.1002497>
- 1623 Hill, M. S., Vande Zande, P., & Wittkopp, P. J. (2020). Molecular and evolutionary processes  
1624 generating variation in gene expression. *Nature Reviews Genetics*, 1-13.  
1625 <https://doi.org/10.1038/s41576-020-00304-w>
- 1626 Hodgins-Davis, A., Duveau, F., Walker, E. A., & Wittkopp, P. J. (2019). Empirical measures of

- 1627 mutational effects define neutral models of regulatory evolution in *Saccharomyces*  
1628 *cerevisiae*. *Proceedings of the National Academy of Sciences*, *116*(42), 21085-21093.  
1629 <https://doi.org/10.1073/pnas.1902823116>
- 1630 Hornung, G., Oren, M., & Barkai, N. (2012). Nucleosome organization affects the sensitivity of  
1631 gene expression to promoter mutations. *Molecular Cell*, *46*(3), 362-368.  
1632 <https://doi.org/10.1016/j.molcel.2012.02.019>
- 1633 Hossain, M. A., Claggett, J. M., Edwards, S. R., Shi, A., Pennebaker, S. L., Cheng, M. Y.,  
1634 Hasty, J., & Johnson, T. L. (2016). Posttranscriptional Regulation of Gcr1 Expression  
1635 and Activity Is Crucial for Metabolic Adjustment in Response to Glucose Availability.  
1636 *Molecular Cell*, *62*(3), 346-358. <https://doi.org/10.1016/j.molcel.2016.04.012>
- 1637 Hughes, T. R., & Boer, C. G. de. (2013). Mapping Yeast Transcriptional Networks. *Genetics*,  
1638 *195*(1), 9-36. <https://doi.org/10.1534/genetics.113.153262>
- 1639 Hughes, T. R., Marton, M. J., Jones, A. R., Roberts, C. J., Stoughton, R., Armour, C. D.,  
1640 Bennett, H. A., Coffey, E., Dai, H., He, Y. D., Kidd, M. J., King, A. M., Meyer, M. R.,  
1641 Slade, D., Lum, P. Y., Stepaniants, S. B., Shoemaker, D. D., Gachotte, D., Chakraburty,  
1642 K., ... Friend, S. H. (2000). Functional Discovery via a Compendium of Expression  
1643 Profiles. *Cell*, *102*(1), 109-126. [https://doi.org/10.1016/S0092-8674\(00\)00015-5](https://doi.org/10.1016/S0092-8674(00)00015-5)
- 1644 Huie, M. A., Scott, E. W., Drazinic, C. M., Lopez, M. C., Hornstra, I. K., Yang, T. P., & Baker, H.  
1645 V. (1992). Characterization of the DNA-binding activity of GCR1 : In vivo evidence for  
1646 two GCR1-binding sites in the upstream activating sequence of TPI of *Saccharomyces*  
1647 *cerevisiae*. *Molecular and Cellular Biology*, *12*(6), 2690-2700.
- 1648 Jackson, C. A., Castro, D. M., Saldi, G.-A., Bonneau, R., & Gresham, D. (2020). Gene  
1649 regulatory network reconstruction using single-cell RNA sequencing of barcoded  
1650 genotypes in diverse environments. *eLife*, *9*, e51254. <https://doi.org/10.7554/eLife.51254>
- 1651 Kafri, M., Metzl-Raz, E., Jona, G., & Barkai, N. (2016). The Cost of Protein Production. *Cell*

- 1652 *Reports*, 14(1), 22-31. <https://doi.org/10.1016/j.celrep.2015.12.015>
- 1653 Kemmeren, P., Sameith, K., van de Pasch, L. A. L., Benschop, J. J., Lenstra, T. L., Margaritis,  
1654 T., O'Duibhir, E., Apweiler, E., van Wageningen, S., Ko, C. W., van Heesch, S., Kashani,  
1655 M. M., Ampatziadis-Michailidis, G., Brok, M. O., Brabers, N. A. C. H., Miles, A. J.,  
1656 Bouwmeester, D., van Hooff, S. R., van Bakel, H., ... Holstege, F. C. P. (2014). Large-  
1657 Scale Genetic Perturbations Reveal Regulatory Networks and an Abundance of Gene-  
1658 Specific Repressors. *Cell*, 157(3), 740-752. <https://doi.org/10.1016/j.cell.2014.02.054>
- 1659 Khan, S., & Vihinen, M. (2007). Spectrum of disease-causing mutations in protein secondary  
1660 structures. *BMC Structural Biology*, 7(1), 56. <https://doi.org/10.1186/1472-6807-7-56>
- 1661 Konig, P., Giraldo, R., Chapman, L., & Rhodes, D. (1996). The crystal structure of the DNA-  
1662 binding domain of yeast RAP1 in complex with telomeric DNA. *Cell*, 85(1), 125-136.  
1663 [https://doi.org/10.1016/s0092-8674\(00\)81088-0](https://doi.org/10.1016/s0092-8674(00)81088-0)
- 1664 Kwasnieski, J. C., Mogno, I., Myers, C. A., Corbo, J. C., & Cohen, B. A. (2012). Complex effects  
1665 of nucleotide variants in a mammalian cis-regulatory element. *Proceedings of the*  
1666 *National Academy of Sciences of the United States of America*, 109(47), 19498-19503.  
1667 <https://doi.org/10.1073/pnas.1210678109>
- 1668 Langmead, B., & Salzberg, S. L. (2012). Fast gapped-read alignment with Bowtie 2. *Nature*  
1669 *Methods*, 9(4), 357-359. <https://doi.org/10.1038/nmeth.1923>
- 1670 Laughery, M. F., Hunter, T., Brown, A., Hoopes, J., Ostbye, T., Shumaker, T., & Wyrick, J. J.  
1671 (2015). New Vectors for Simple and Streamlined CRISPR-Cas9 Genome Editing in  
1672 *Saccharomyces cerevisiae*. *Yeast (Chichester, England)*, 32(12), 711-720.  
1673 <https://doi.org/10.1002/yea.3098>
- 1674 Leeuwen, J. van, Pons, C., Mellor, J. C., Yamaguchi, T. N., Friesen, H., Koschwanez, J., Ušaj,  
1675 M. M., Pechlaner, M., Takar, M., Ušaj, M., VanderSluis, B., Andrusiak, K., Bansal, P.,  
1676 Baryshnikova, A., Boone, C. E., Cao, J., Cote, A., Gebbia, M., Horecka, G., ... Boone, C.

- 1677 (2016). Exploring genetic suppression interactions on a global scale. *Science*,  
1678 354(6312). <https://doi.org/10.1126/science.aag0839>
- 1679 Lewis, J. A., Broman, A. T., Will, J., & Gasch, A. P. (2014). Genetic Architecture of Ethanol-  
1680 Responsive Transcriptome Variation in *Saccharomyces cerevisiae* Strains. *Genetics*,  
1681 198(1), 369-382. <https://doi.org/10.1534/genetics.114.167429>
- 1682 Li, B., Carey, M., & Workman, J. L. (2007). The Role of Chromatin during Transcription. *Cell*,  
1683 128(4), 707-719. <https://doi.org/10.1016/j.cell.2007.01.015>
- 1684 Liu, J., François, J.-M., & Capp, J.-P. (2019). Gene Expression Noise Produces Cell-to-Cell  
1685 Heterogeneity in Eukaryotic Homologous Recombination Rate. *Frontiers in Genetics*, 10,  
1686 475. <https://doi.org/10.3389/fgene.2019.00475>
- 1687 Liu, Z., Miller, D., Li, F., Liu, X., & Levy, S. F. (2020). A large accessory protein interactome is  
1688 rewired across environments. *eLife*, 9, e62365. <https://doi.org/10.7554/eLife.62365>
- 1689 López, M. C., & Baker, H. V. (2000). Understanding the Growth Phenotype of the Yeast *gcr1*  
1690 Mutant in Terms of Global Genomic Expression Patterns. *Journal of Bacteriology*,  
1691 182(17), 4970-4978.
- 1692 Lutz, S., Brion, C., Kliebhan, M., & Albert, F. W. (2019). DNA variants affecting the expression  
1693 of numerous genes in trans have diverse mechanisms of action and evolutionary  
1694 histories. *PLoS Genetics*, 15(11), e1008375.  
1695 <https://doi.org/10.1371/journal.pgen.1008375>
- 1696 Maricque, B. B., Dougherty, J. D., & Cohen, B. A. (2017). A genome-integrated massively  
1697 parallel reporter assay reveals DNA sequence determinants of cis-regulatory activity in  
1698 neural cells. *Nucleic Acids Research*, 45(4), e16-e16. <https://doi.org/10.1093/nar/gkw942>
- 1699 Martin, M. (2011). Cutadapt removes adapter sequences from high-throughput sequencing  
1700 reads. *EMBnet.Journal*, 17(1), 10-12. <https://doi.org/10.14806/ej.17.1.200>
- 1701 McAlister, L., & Holland, M. J. (1985). Isolation and characterization of yeast strains carrying  
1702 mutations in the glyceraldehyde-3-phosphate dehydrogenase genes. *The Journal of*

- 1703 *Biological Chemistry*, 260(28), 15013-15018.
- 1704 Mehrabian, M., Allayee, H., Stockton, J., Lum, P. Y., Drake, T. A., Castellani, L. W., Suh, M.,  
1705 Armour, C., Edwards, S., Lamb, J., Lusic, A. J., & Schadt, E. E. (2005). Integrating  
1706 genotypic and expression data in a segregating mouse population to identify 5-  
1707 lipoxygenase as a susceptibility gene for obesity and bone traits. *Nature Genetics*,  
1708 37(11), 1224-1233. <https://doi.org/10.1038/ng1619>
- 1709 Melnikov, A., Murugan, A., Zhang, X., Tesileanu, T., Wang, L., Rogov, P., Feizi, S., Gnirke, A.,  
1710 Callan, C. G., Kinney, J. B., Kellis, M., Lander, E. S., & Mikkelsen, T. S. (2012).  
1711 Systematic dissection and optimization of inducible enhancers in human cells using a  
1712 massively parallel reporter assay. *Nature Biotechnology*, 30(3), 271-277.  
1713 <https://doi.org/10.1038/nbt.2137>
- 1714 Metzger, B. P. H., Duveau, F., Yuan, D. C., Tryban, S., Yang, B., & Wittkopp, P. J. (2016).  
1715 Contrasting Frequencies and Effects of cis- and trans-Regulatory Mutations Affecting  
1716 Gene Expression. *Molecular Biology and Evolution*, 33(5), 1131-1146.  
1717 <https://doi.org/10.1093/molbev/msw011>
- 1718 Metzger, B. P. H., & Wittkopp, P. J. (2019). Compensatory trans-regulatory alleles minimizing  
1719 variation in TDH3 expression are common within *Saccharomyces cerevisiae*. *Evolution*  
1720 *Letters*, 3(5), 448-461. <https://doi.org/10.1002/evl3.137>
- 1721 Metzger, B. P. H., Yuan, D. C., Gruber, J. D., Duveau, F., & Wittkopp, P. J. (2015). Selection on  
1722 noise constrains variation in a eukaryotic promoter. *Nature*, 521(7552), 344-347.  
1723 <https://doi.org/10.1038/nature14244>
- 1724 Mi, H., Muruganujan, A., Ebert, D., Huang, X., & Thomas, P. D. (2019). PANTHER version 14 :  
1725 More genomes, a new PANTHER GO-slim and improvements in enrichment analysis  
1726 tools. *Nucleic Acids Research*, 47(D1), D419-D426. <https://doi.org/10.1093/nar/gky1038>
- 1727 Miller, B. G. (2007). The mutability of enzyme active-site shape determinants. *Protein Science* :



- 1728 *A Publication of the Protein Society*, 16(9), 1965-1968.
- 1729 <https://doi.org/10.1110/ps.073040307>
- 1730 Molnár, J., Szakács, G., & Tusnády, G. E. (2016). Characterization of Disease-Associated  
1731 Mutations in Human Transmembrane Proteins. *PLoS ONE*, 11(3).  
1732 <https://doi.org/10.1371/journal.pone.0151760>
- 1733 Oliver, F., Christians, J. K., Liu, X., Rhind, S., Verma, V., Davison, C., Brown, S. D. M., Denny,  
1734 P., & Keightley, P. D. (2005). Regulatory Variation at Glypican-3 Underlies a Major  
1735 Growth QTL in Mice. *PLOS Biology*, 3(5), e135.  
1736 <https://doi.org/10.1371/journal.pbio.0030135>
- 1737 Outten, C. E., & Albetel, A.-N. (2013). Iron sensing and regulation in *Saccharomyces*  
1738 *cerevisiae* : Ironing out the mechanistic details. *Current Opinion in Microbiology*, 16(6),  
1739 662-668. <https://doi.org/10.1016/j.mib.2013.07.020>
- 1740 Patwardhan, R. P., Lee, C., Litvin, O., Young, D. L., Pe'er, D., & Shendure, J. (2009). High-  
1741 resolution analysis of DNA regulatory elements by synthetic saturation mutagenesis.  
1742 *Nature Biotechnology*, 27(12), 1173-1175. <https://doi.org/10.1038/nbt.1589>
- 1743 Piña, B., Fernández-Larrea, J., García-Reyero, N., & Idrissi, F.-Z. (2003). The different  
1744 (sur)faces of Rap1p. *Molecular Genetics and Genomics: MGG*, 268(6), 791-798.  
1745 <https://doi.org/10.1007/s00438-002-0801-3>
- 1746 Pinson, B., Vaur, S., Sagot, I., Couplier, F., Lemoine, S., & Daignan-Fornier, B. (2009).  
1747 Metabolic intermediates selectively stimulate transcription factor interaction and  
1748 modulate phosphate and purine pathways. *Genes & Development*, 23(12), 1399-1407.  
1749 <https://doi.org/10.1101/gad.521809>
- 1750 Rhee, H. S., & Pugh, B. F. (2011). Comprehensive Genome-wide Protein-DNA Interactions  
1751 Detected at Single-Nucleotide Resolution. *Cell*, 147(6), 1408-1419.  
1752 <https://doi.org/10.1016/j.cell.2011.11.013>

- 1753 Roman, H. (1956). A system selective for mutations affecting the synthesis of adenine in yeast.  
1754 *Compt. Rend. Trav. Lab. Carlsberg, Ser. physiol.*, 26, 299-314.
- 1755 Santangelo, G. M. (2006). Glucose Signaling in *Saccharomyces cerevisiae*. *Microbiology and*  
1756 *Molecular Biology Reviews*, 70(1), 253-282. [https://doi.org/10.1128/MMBR.70.1.253-](https://doi.org/10.1128/MMBR.70.1.253-282.2006)  
1757 282.2006
- 1758 Schadt, E. E., Lamb, J., Yang, X., Zhu, J., Edwards, S., Guhathakurta, D., Sieberts, S. K.,  
1759 Monks, S., Reitman, M., Zhang, C., Lum, P. Y., Leonardson, A., Thieringer, R., Metzger,  
1760 J. M., Yang, L., Castle, J., Zhu, H., Kash, S. F., Drake, T. A., ... Lusk, A. J. (2005). An  
1761 integrative genomics approach to infer causal associations between gene expression  
1762 and disease. *Nature Genetics*, 37(7), 710-717. <https://doi.org/10.1038/ng1589>
- 1763 Sharon, E., Kalma, Y., Sharp, A., Raveh-Sadka, T., Levo, M., Zeevi, D., Keren, L., Yakhini, Z.,  
1764 Weinberger, A., & Segal, E. (2012). Inferring gene regulatory logic from high-throughput  
1765 measurements of thousands of systematically designed promoters. *Nature*  
1766 *Biotechnology*, 30(6), 521-530. <https://doi.org/10.1038/nbt.2205>
- 1767 Shively, C. A., Liu, J., Chen, X., Loell, K., & Mitra, R. D. (2019). Homotypic cooperativity and  
1768 collective binding are determinants of bHLH specificity and function. *Proceedings of the*  
1769 *National Academy of Sciences of the United States of America*, 116(32), 16143-16152.  
1770 <https://doi.org/10.1073/pnas.1818015116>
- 1771 Shiwa, Y., Fukushima-Tanaka, S., Kasahara, K., Horiuchi, T., & Yoshikawa, H. (2012). *Whole-*  
1772 *Genome Profiling of a Novel Mutagenesis Technique Using Proofreading-Deficient DNA*  
1773 *Polymerase* [Research Article]. *International Journal of Evolutionary Biology*.  
1774 <https://doi.org/10.1155/2012/860797>
- 1775 Stuckey, S., Mukherjee, K., & Storici, F. (2011). In Vivo Site-Specific Mutagenesis and Gene  
1776 Collage Using the Delitto Perfetto System in Yeast *Saccharomyces cerevisiae*. *Methods*  
1777 *in molecular biology (Clifton, N.J.)*, 745, 173-191. <https://doi.org/10.1007/978-1-61779->

- 1778 129-1\_11
- 1779 Tarassov, K., Messier, V., Landry, C. R., Radinovic, S., Molina, M. M. S., Shames, I.,  
1780 Malitskaya, Y., Vogel, J., Bussey, H., & Michnick, S. W. (2008). An in Vivo Map of the  
1781 Yeast Protein Interactome. *Science*, *320*(5882), 1465-1470.  
1782 <https://doi.org/10.1126/science.1153878>
- 1783 Teixeira, M. C., Monteiro, P. T., Palma, M., Costa, C., Godinho, C. P., Pais, P., Cavalheiro, M.,  
1784 Antunes, M., Lemos, A., Pedreira, T., & Sá-Correia, I. (2018). YEASTRACT : An  
1785 upgraded database for the analysis of transcription regulatory networks in  
1786 *Saccharomyces cerevisiae*. *Nucleic Acids Research*, *46*(D1), D348-D353.  
1787 <https://doi.org/10.1093/nar/gkx842>
- 1788 Uemura, H., Koshio, M., Inoue, Y., Lopez, M. C., & Baker, H. V. (1997). The role of Gcr1p in the  
1789 transcriptional activation of glycolytic genes in yeast *Saccharomyces cerevisiae*.  
1790 *Genetics*, *147*(2), 521-532.
- 1791 Uphoff, S., Lord, N. D., Okumus, B., Potvin-Trottier, L., Sherratt, D. J., & Paulsson, J. (2016).  
1792 Stochastic activation of a DNA damage response causes cell-to-cell mutation rate  
1793 variation. *Science*, *351*(6277), 1094-1097. <https://doi.org/10.1126/science.aac9786>
- 1794 Vitkup, D., Sander, C., & Church, G. M. (2003). The amino-acid mutational spectrum of human  
1795 genetic disease. *Genome Biology*, *4*(11), R72. <https://doi.org/10.1186/gb-2003-4-11-r72>
- 1796 Yagi, S., Yagi, K., Fukuoka, J., & Suzuki, M. (1994). The UAS of the yeast GAPDH promoter  
1797 consists of multiple general functional elements including RAP1 and GRF2 binding sites.  
1798 *The Journal of Veterinary Medical Science*, *56*(2), 235-244.  
1799 <https://doi.org/10.1292/jvms.56.235>
- 1800 Yampolsky, L. Y., & Stoltzfus, A. (2005). The exchangeability of amino acids in proteins.  
1801 *Genetics*, *170*(4), 1459-1472. <https://doi.org/10.1534/genetics.104.039107>
- 1802 Yao, C., Joehanes, R., Johnson, A. D., Huan, T., Liu, C., Freedman, J. E., Munson, P. J., Hill,

- 1803 D. E., Vidal, M., & Levy, D. (2017). Dynamic Role of trans Regulation of Gene  
1804 Expression in Relation to Complex Traits. *The American Journal of Human Genetics*,  
1805 *100*(4), 571-580. <https://doi.org/10.1016/j.ajhg.2017.02.003>
- 1806 Yvert, G., Brem, R. B., Whittle, J., Akey, J. M., Foss, E., Smith, E. N., Mackelprang, R., &  
1807 Kruglyak, L. (2003). Trans-acting regulatory variation in *Saccharomyces cerevisiae* and  
1808 the role of transcription factors. *Nature Genetics*, *35*(1), 57-64.  
1809 <https://doi.org/10.1038/ng1222>
- 1810 Zheng, W., Zhao, H., Mancera, E., Steinmetz, L. M., & Snyder, M. (2010). Genetic analysis of  
1811 variation in transcription factor binding in yeast. *Nature*, *464*(7292), 1187-1191.  
1812 <https://doi.org/10.1038/nature08934>
- 1813 Zhu, C., Byers, K. J. R. P., McCord, R. P., Shi, Z., Berger, M. F., Newburger, D. E., Saulrieta,  
1814 K., Smith, Z., Shah, M. V., Radhakrishnan, M., Philippakis, A. A., Hu, Y., De Masi, F.,  
1815 Pacek, M., Rolfs, A., Murthy, T., Labaer, J., & Bulyk, M. L. (2009). High-resolution DNA-  
1816 binding specificity analysis of yeast transcription factors. *Genome Research*, *19*(4),  
1817 556-566. <https://doi.org/10.1101/gr.090233.108>

1818

1819

1820

1821 **Supplementary data**

1822

1823 **Supplementary Table 1.** Statistical associations between aneuploidies and fluorescence level.

1824

1825 **Supplementary File 1.** Sequencing depth in BSA-seq data

1826 **Supplementary File 2.** List of all mutations identified by BSA-Seq or Sanger sequencing in this  
1827 study

1828 **Supplementary File 3.** Linked mutations associated with fluorescence level in BSA-Seq  
1829 experiments

1830 **Supplementary File 4.** Mutations identified by Sanger sequencing of candidate genes

1831 **Supplementary File 5.** Mutations tested in single-site mutants

1832 **Supplementary File 6.** Mutations associated with fluorescence level in BSA-Seq experiments

1833 **Supplementary File 7.** Targeted mutagenesis of RAP1 residues making direct contact with  
1834 DNA

- 1835 **Supplementary File 8.** List of GO terms overrepresented in genes hit by causative mutations  
1836 relative to genes hit by neutral mutations
- 1837 **Supplementary File 9.** Mutations located in the coding sequence of glucose signaling genes
- 1838 **Supplementary File 10.** *Trans*-regulatory effects of mutations in purine biosynthesis genes or  
1839 iron homeostasis genes
- 1840 **Supplementary File 11.** Files used as inputs for analyses performed with the PBS script  
1841 (Supplementary File 15) and R scripts (Supplementary Files 12, 16 and 17).
- 1842 **Supplementary File 12.** R scripts used for the analysis of flow cytometry data
- 1843 **Supplementary File 13.** List of DNA libraries grouped by sequencing runs
- 1844 **Supplementary File 14.** List of oligonucleotides used in this study
- 1845 **Supplementary File 15.** PBS script used to process FASTQ files
- 1846 **Supplementary File 16.** R scripts used for the analysis of BSA-Seq data and for comparing the  
1847 properties of *trans*-regulatory and non-regulatory mutations.
- 1848 **Supplementary File 17.** R script used to annotate variants identified in BSA-Seq data
- 1849 **Supplementary File 18.** Construction of single-site mutant strains
- 1850 **Supplementary File 19.** Phenotypes of RAP1 mutants (expression) and GCR1 mutants  
1851 (expression and fitness)
- 1852
- 1853



**A Collections of mutants analyzed in this study.**

| Collection                 | Initial sorting | Ploidy | Mutants total | Analyzed by BSA-Seq | Analyzed by Sanger seq | Decreased fluorescence | Increased fluorescence | Figure panels |
|----------------------------|-----------------|--------|---------------|---------------------|------------------------|------------------------|------------------------|---------------|
| Gruber <i>et al.</i> 2012  | Large effects   | 1n     | 1064          | 6                   | 0                      | 3                      | 3                      | 1B            |
| Metzger <i>et al.</i> 2016 | Large effects   | 1n     | 211           | 5*                  | 11*                    | 1                      | 14                     | 1C            |
| Metzger <i>et al.</i> 2016 | Unenriched      | 1n     | 1498          | 71                  | 6                      | 35                     | 42                     | 1D,E          |

**B**

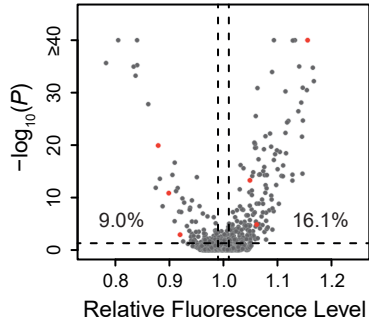

**C**

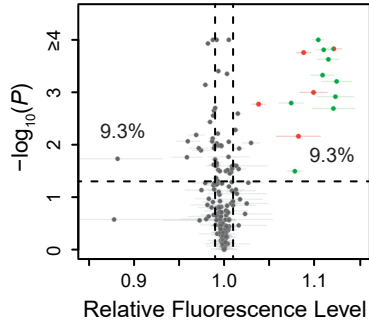

**D**

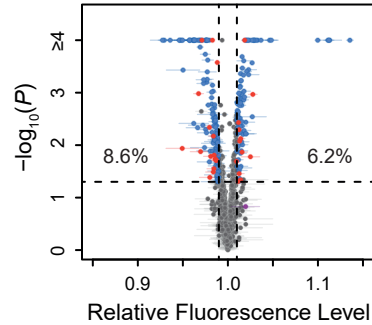

**E**

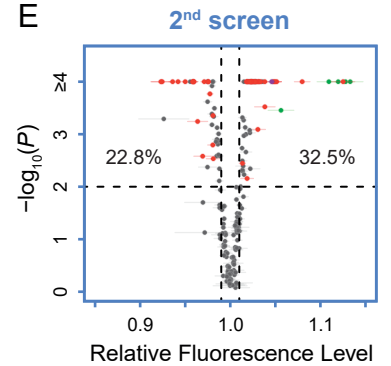

**Figure 1**

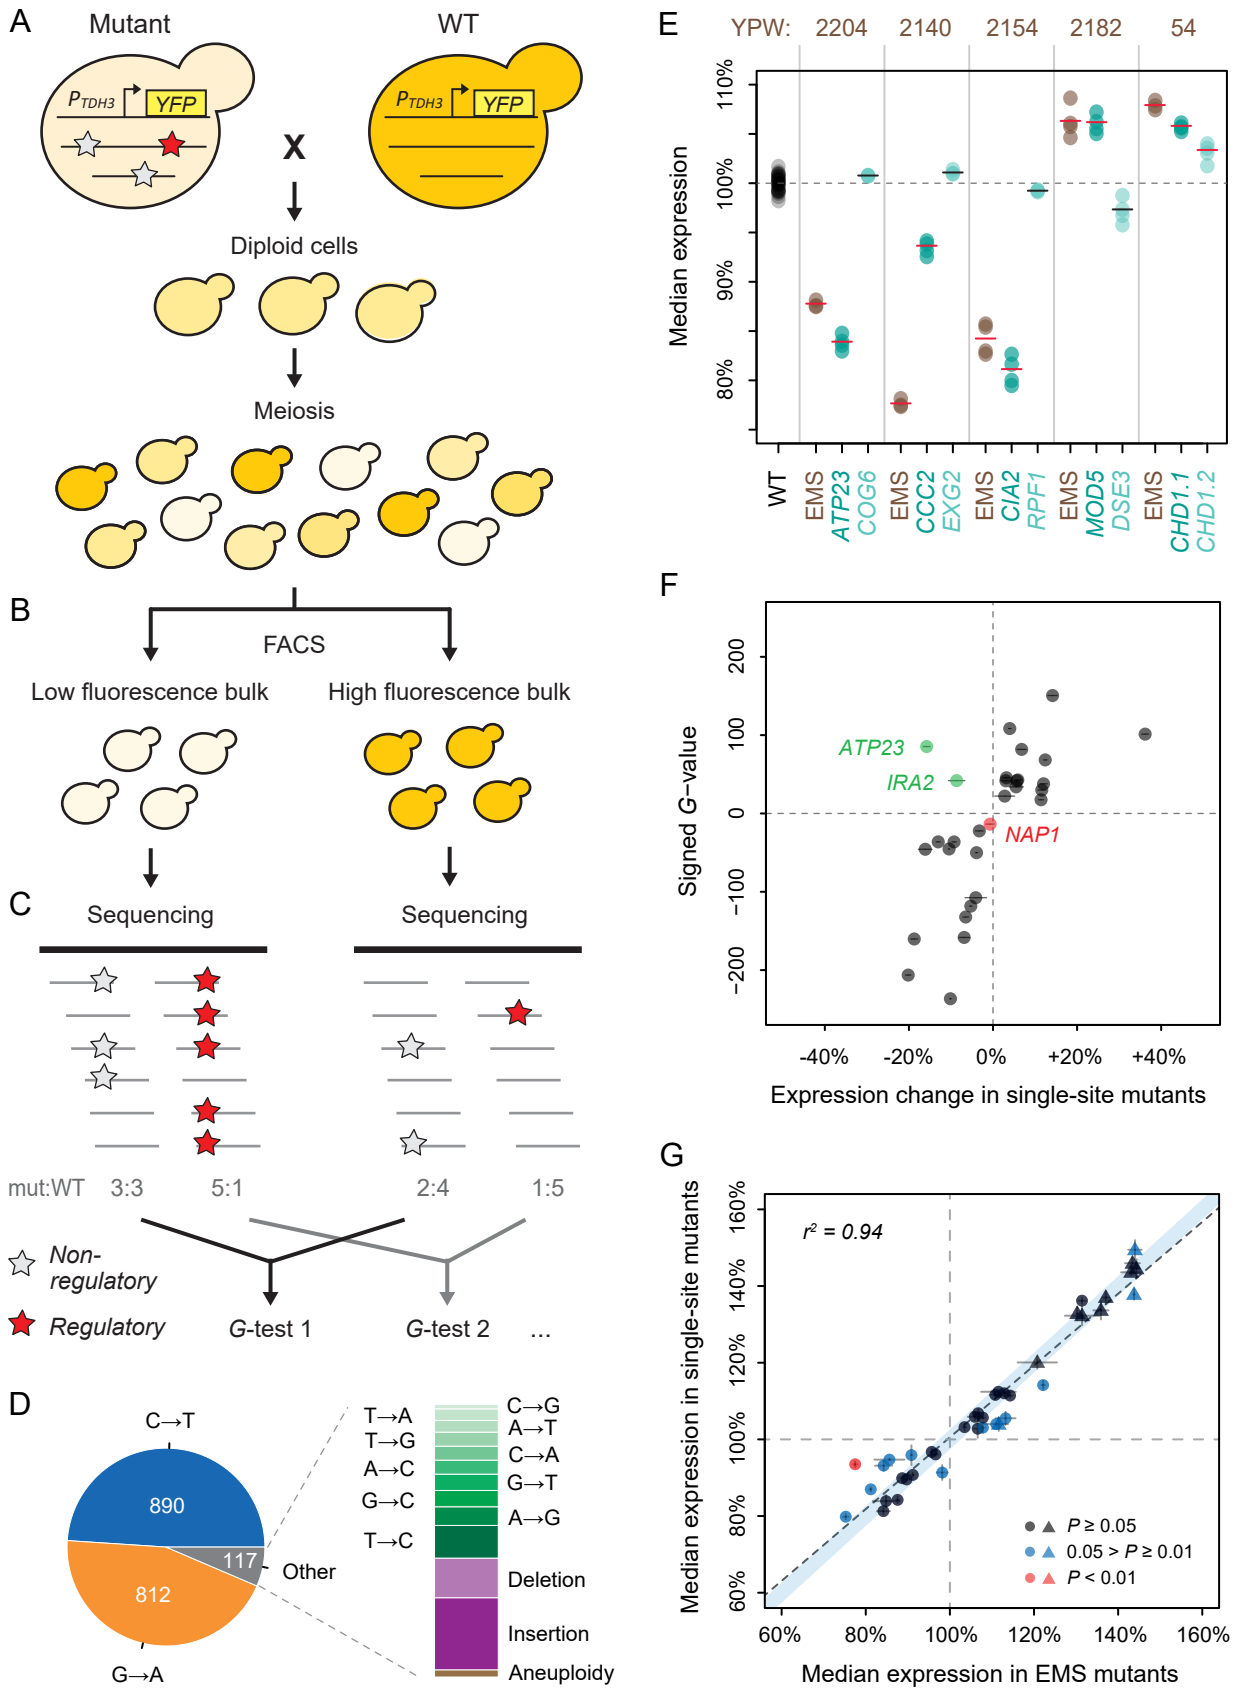

**Figure 2**

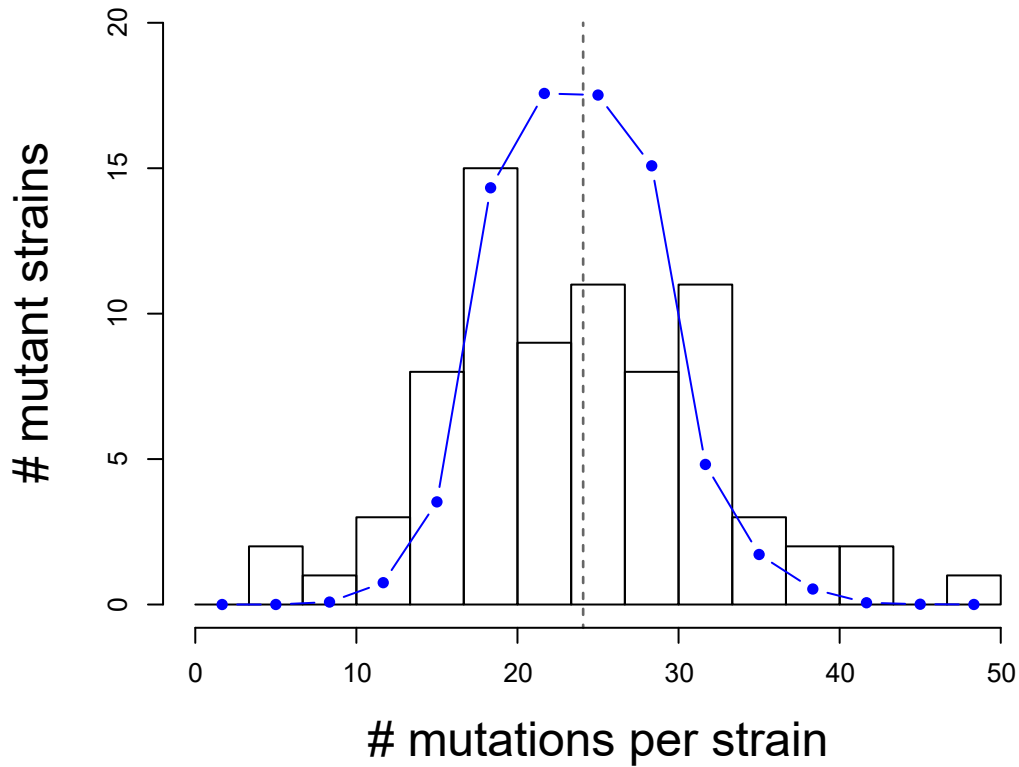

**Figure 2 - figure supplement 1**

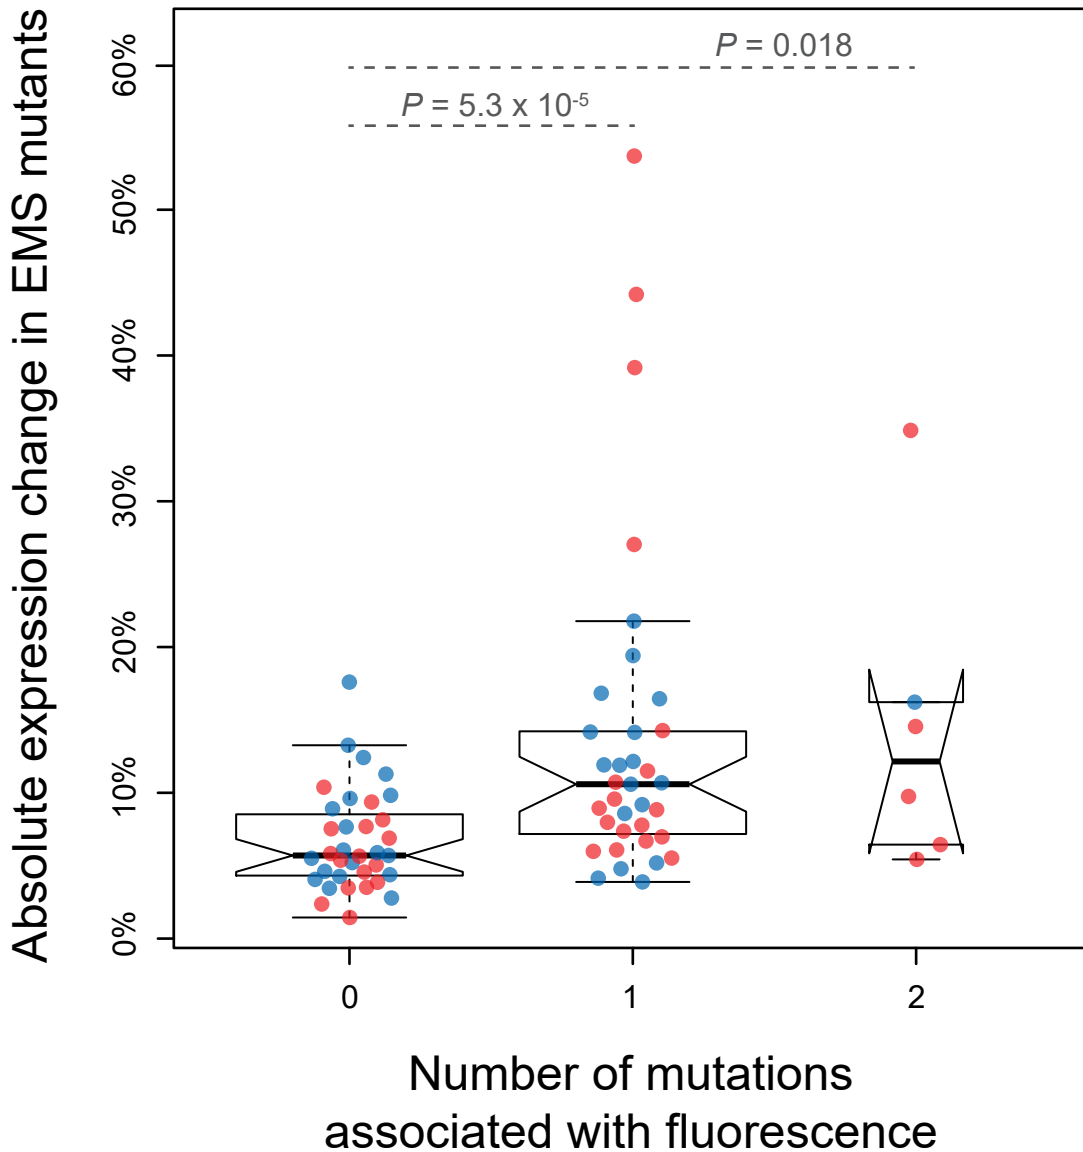

**Figure 2 - figure supplement 2**

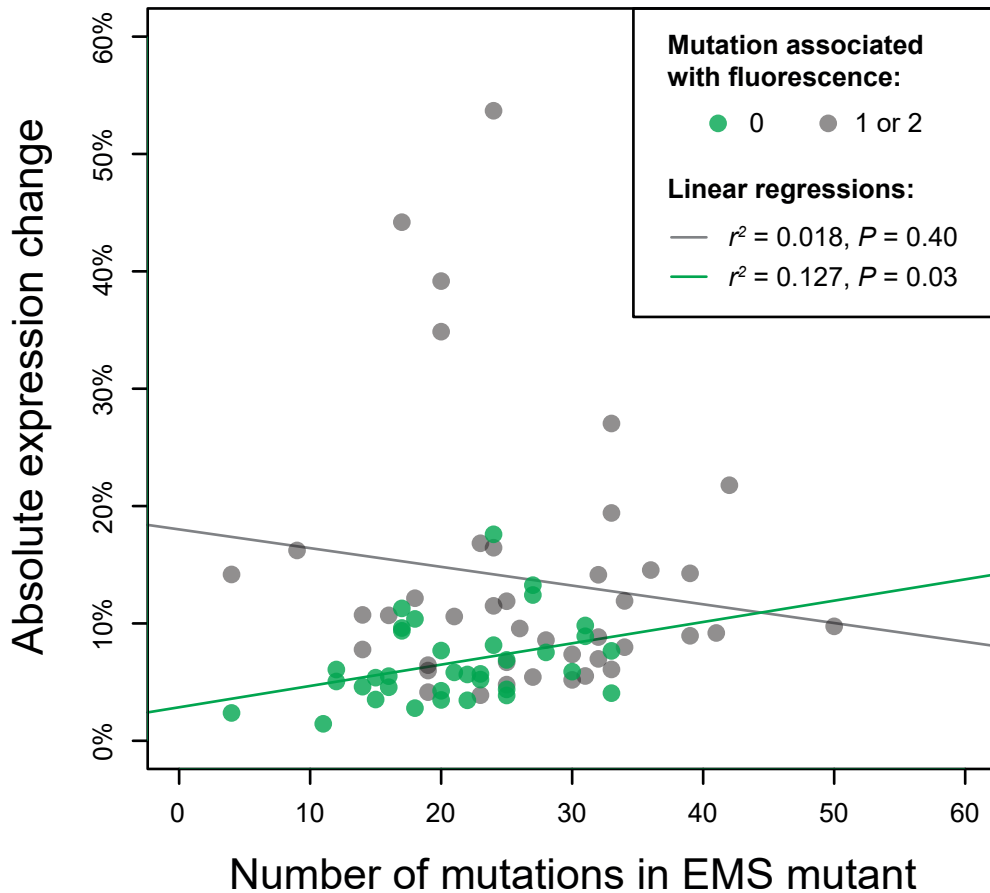

**Figure 2 - figure supplement 3**



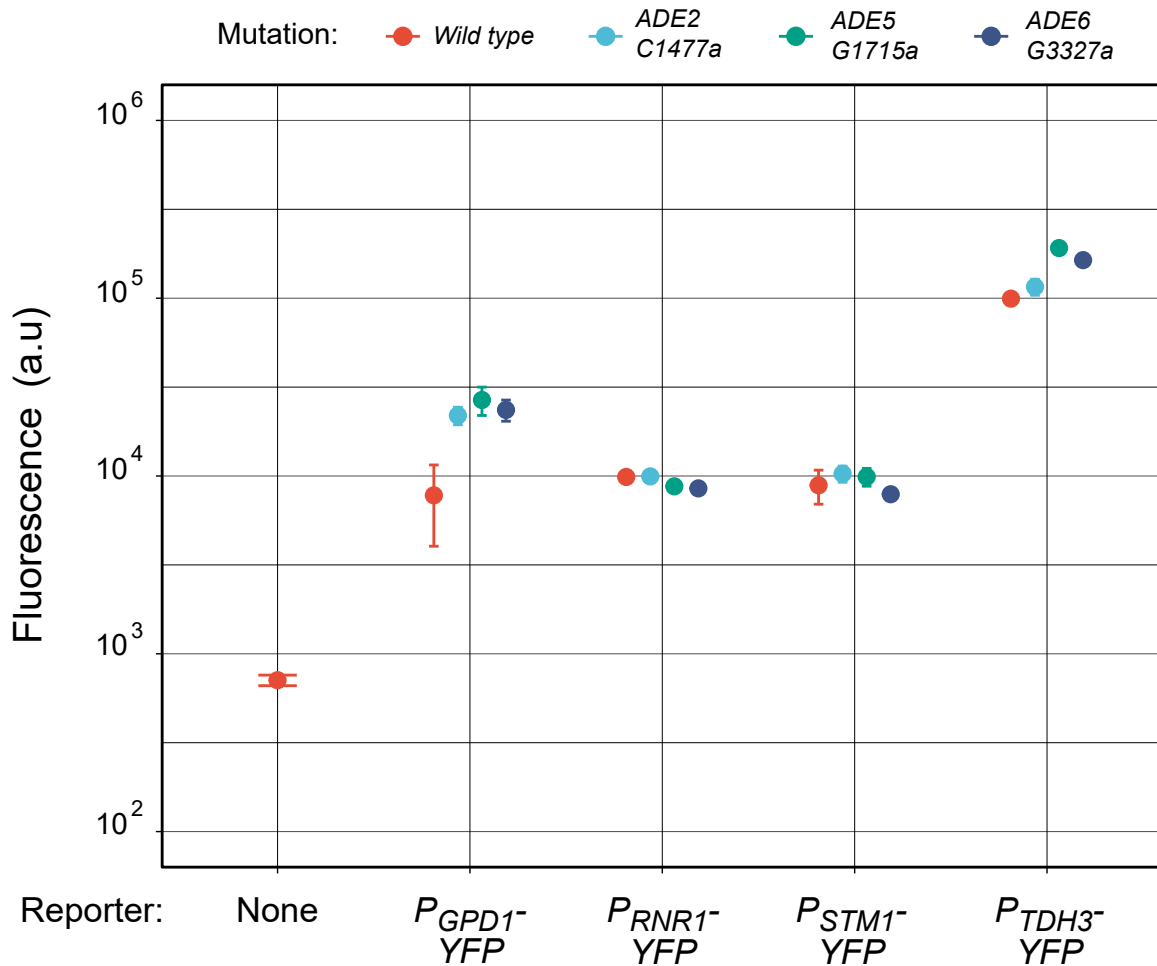

**Figure 2 - figure supplement 4**

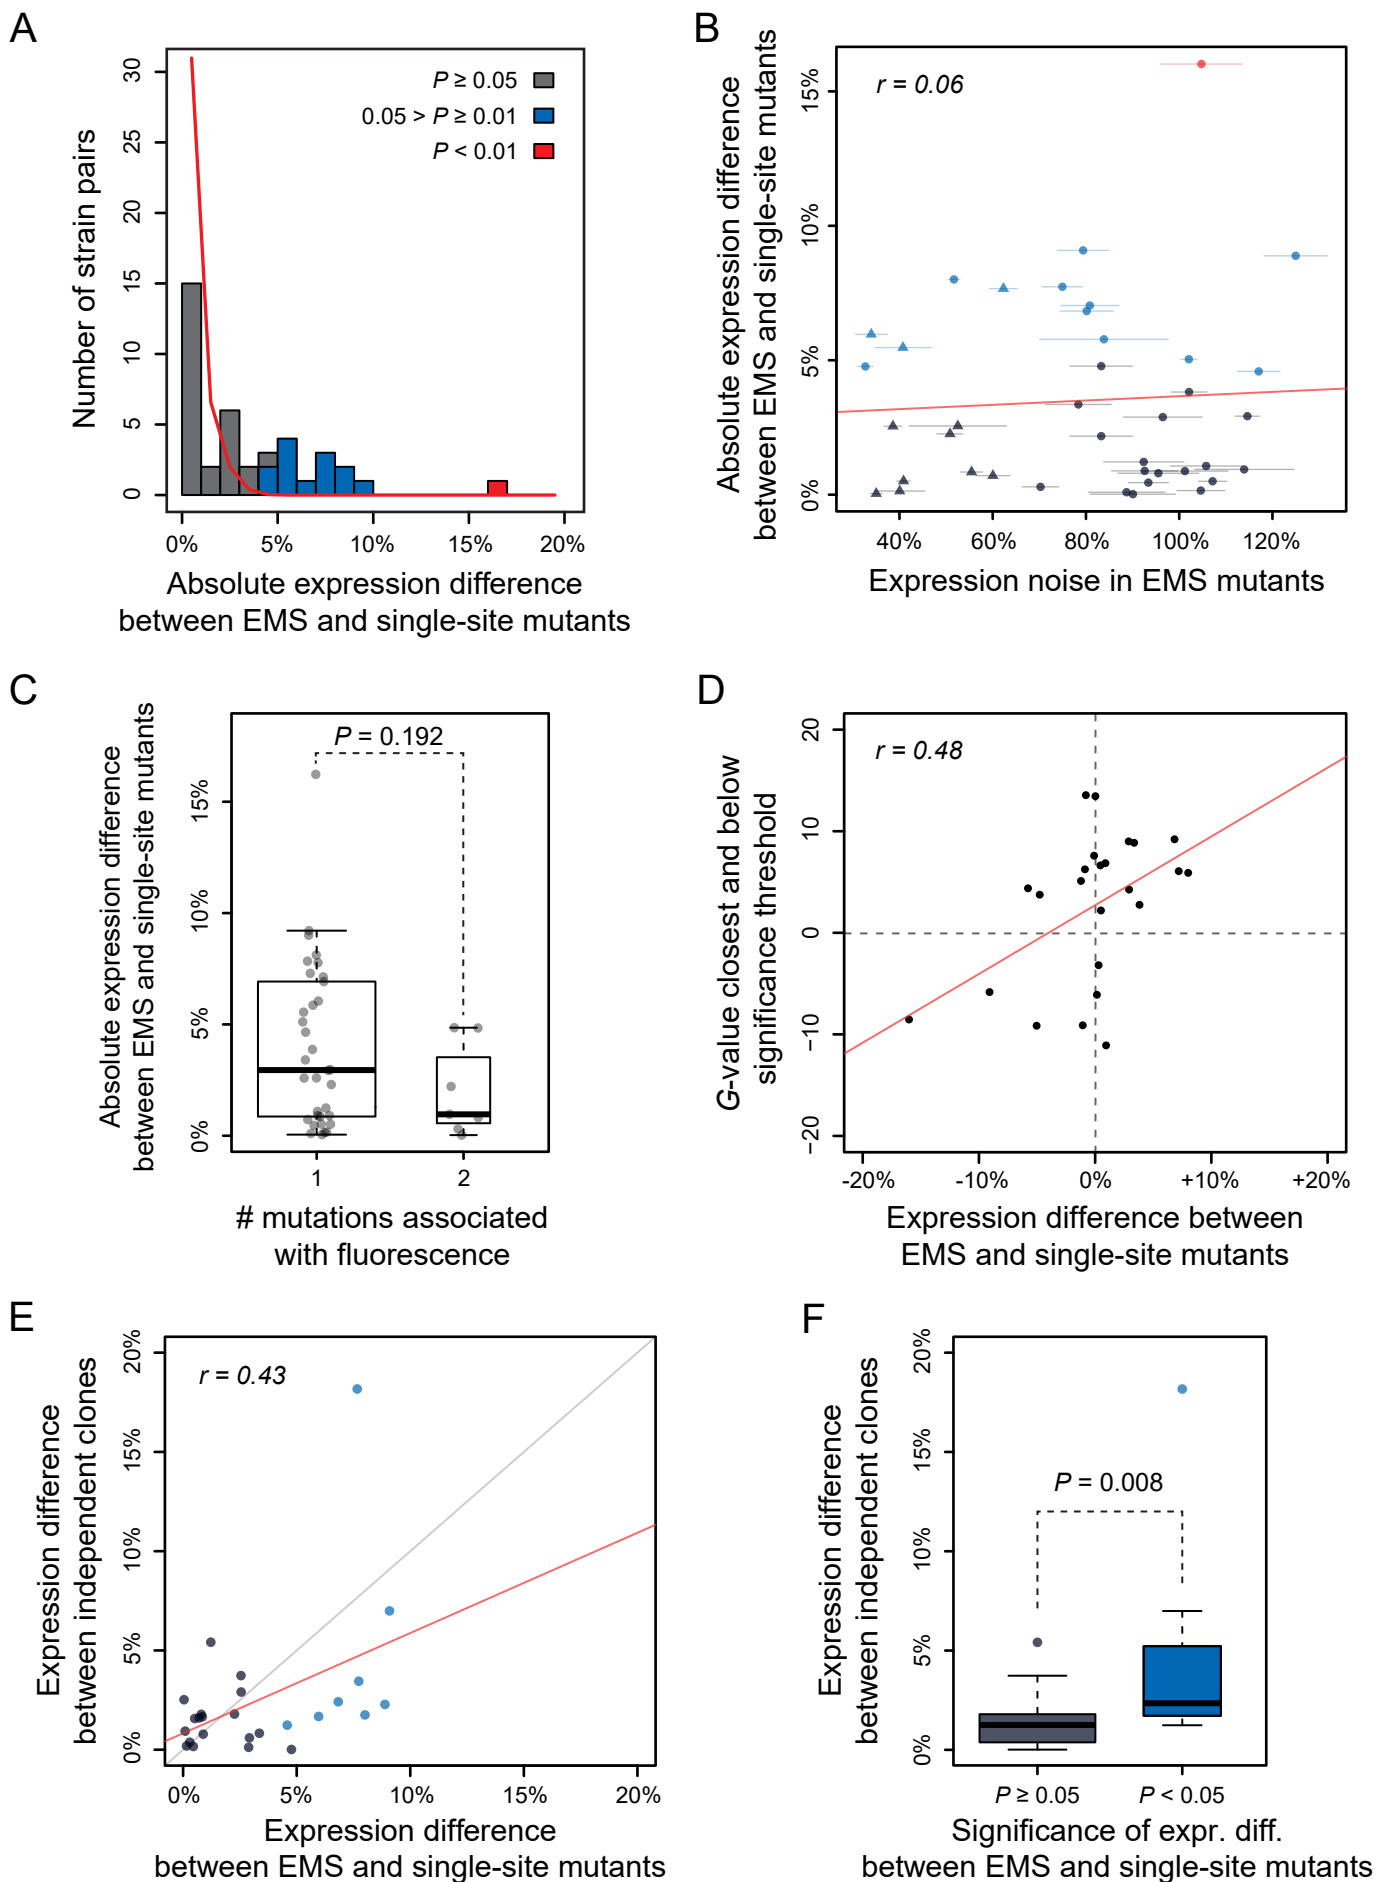

**Figure 2 - figure supplement 5**

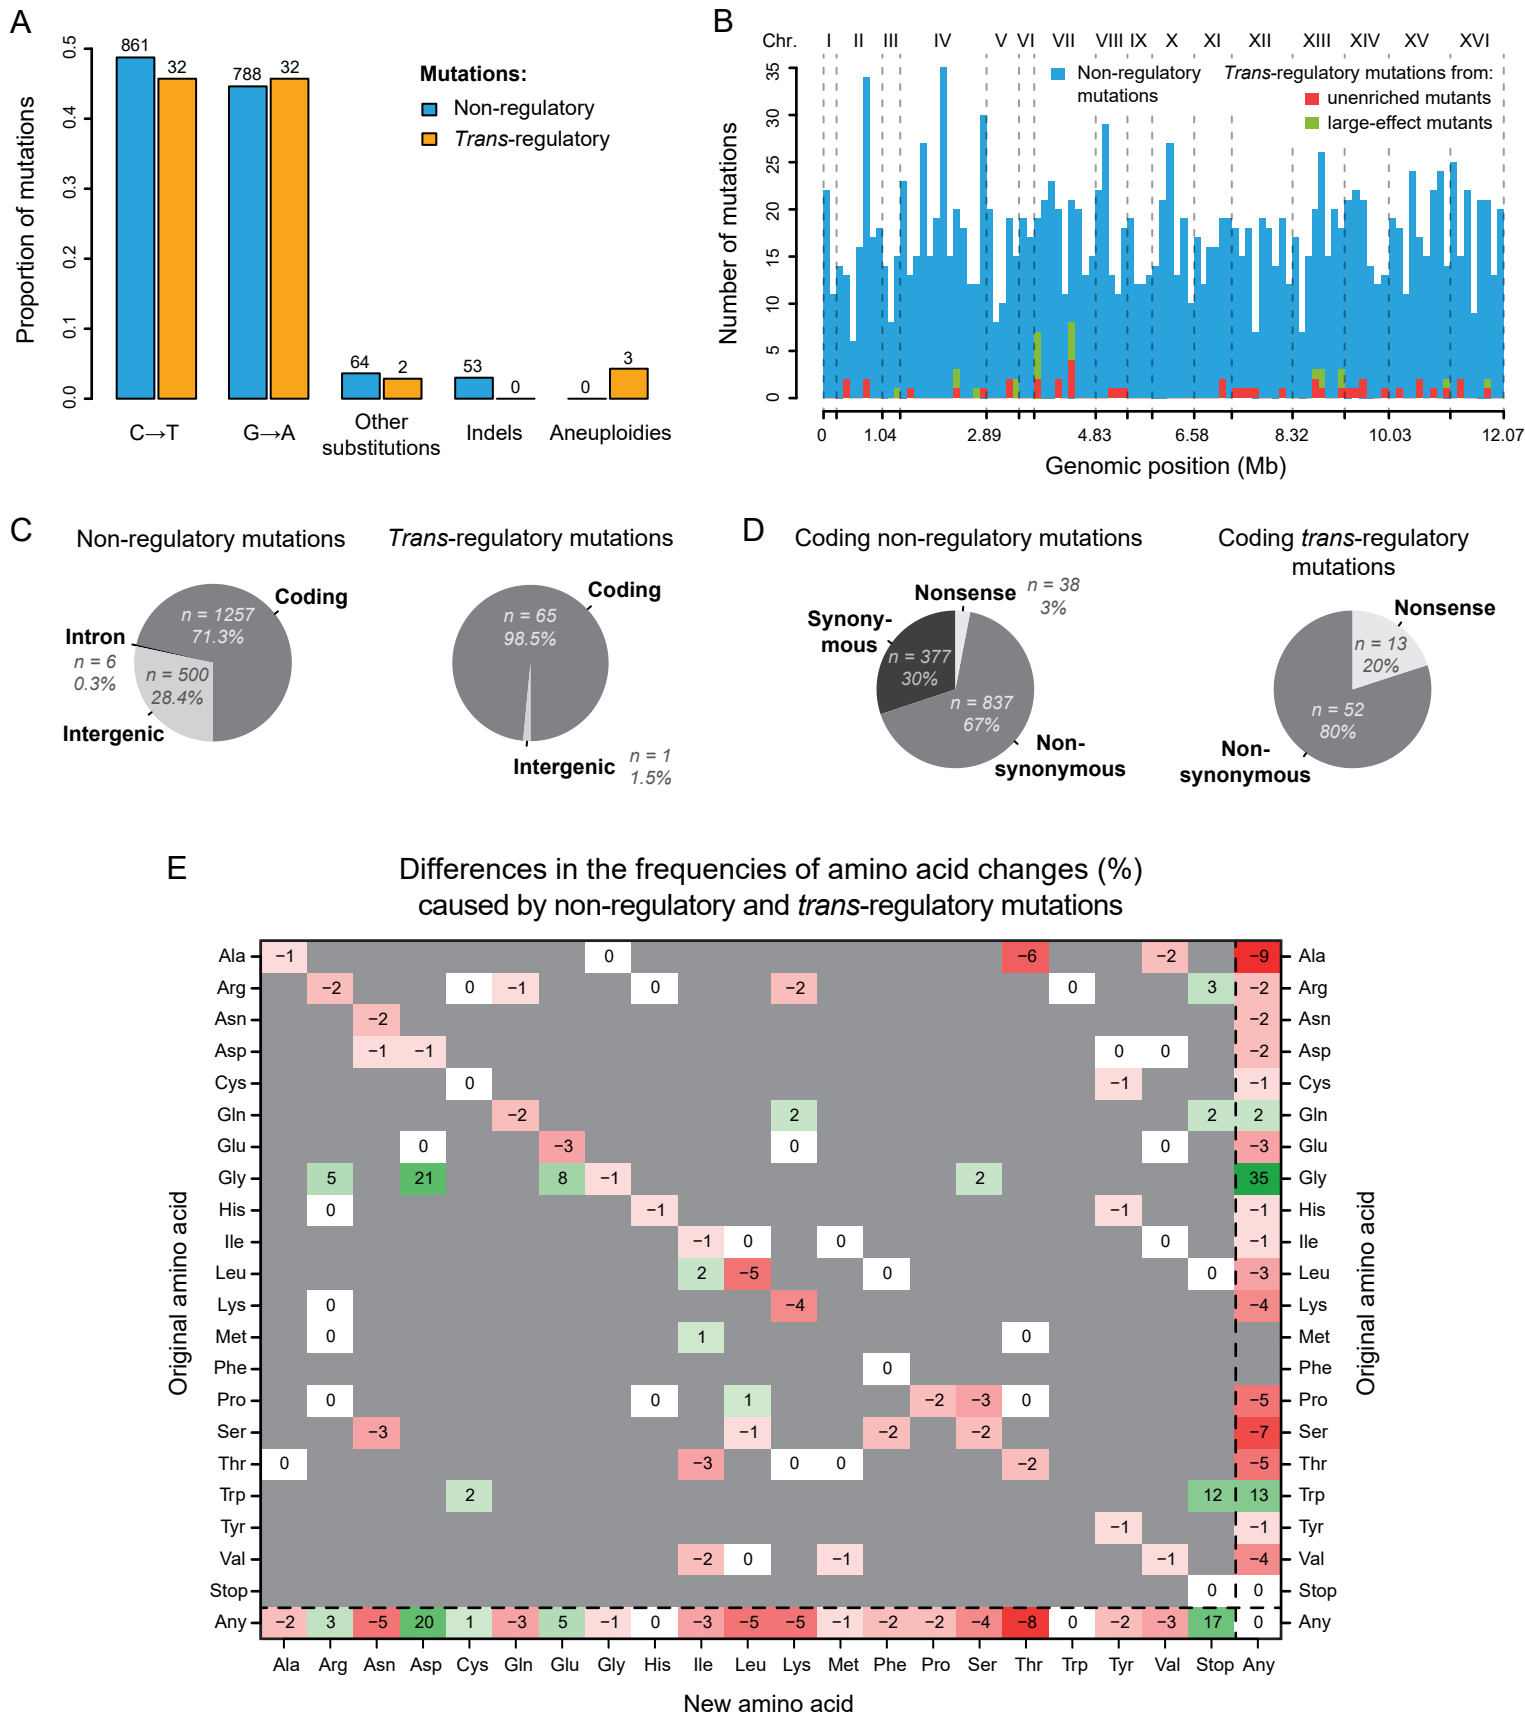

**Figure 3**

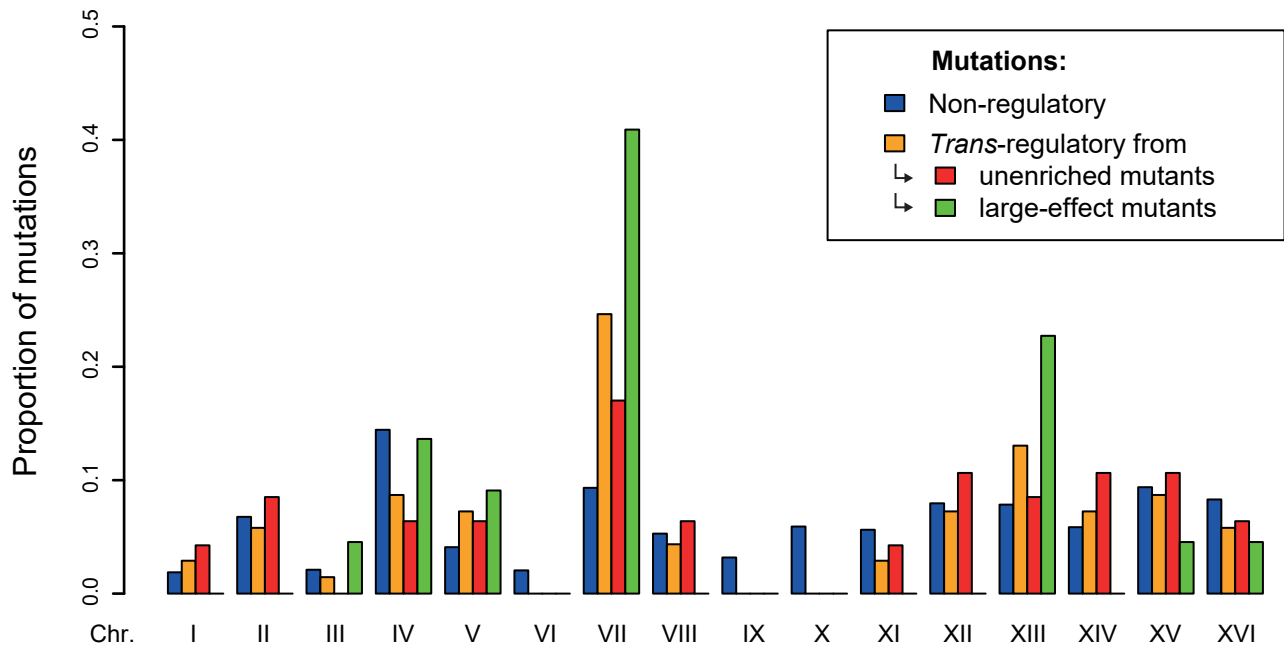

**Figure 3 - figure supplement 1**

$-\log_{10}(P\text{-value})$  of permutation tests comparing frequencies of amino-acid changes caused by non-regulatory and *trans*-regulatory mutations

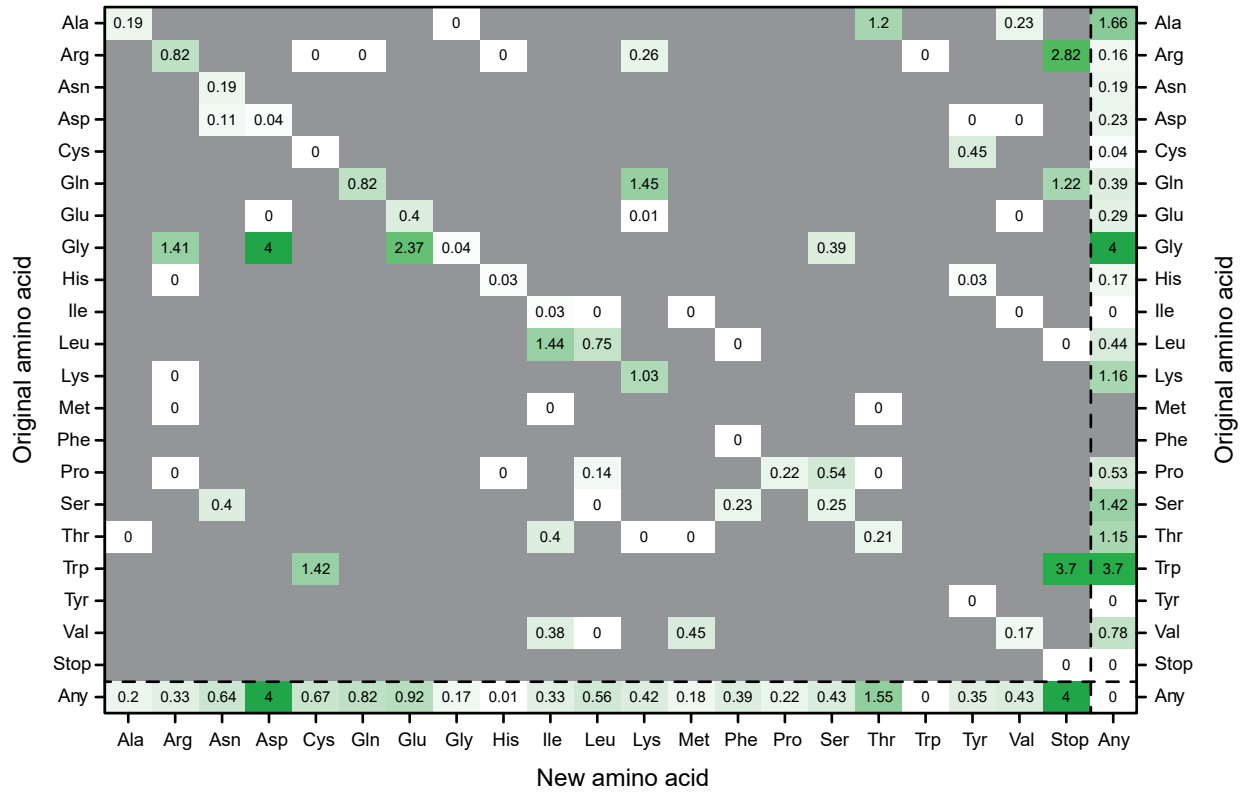

**Figure 3 - figure supplement 2**



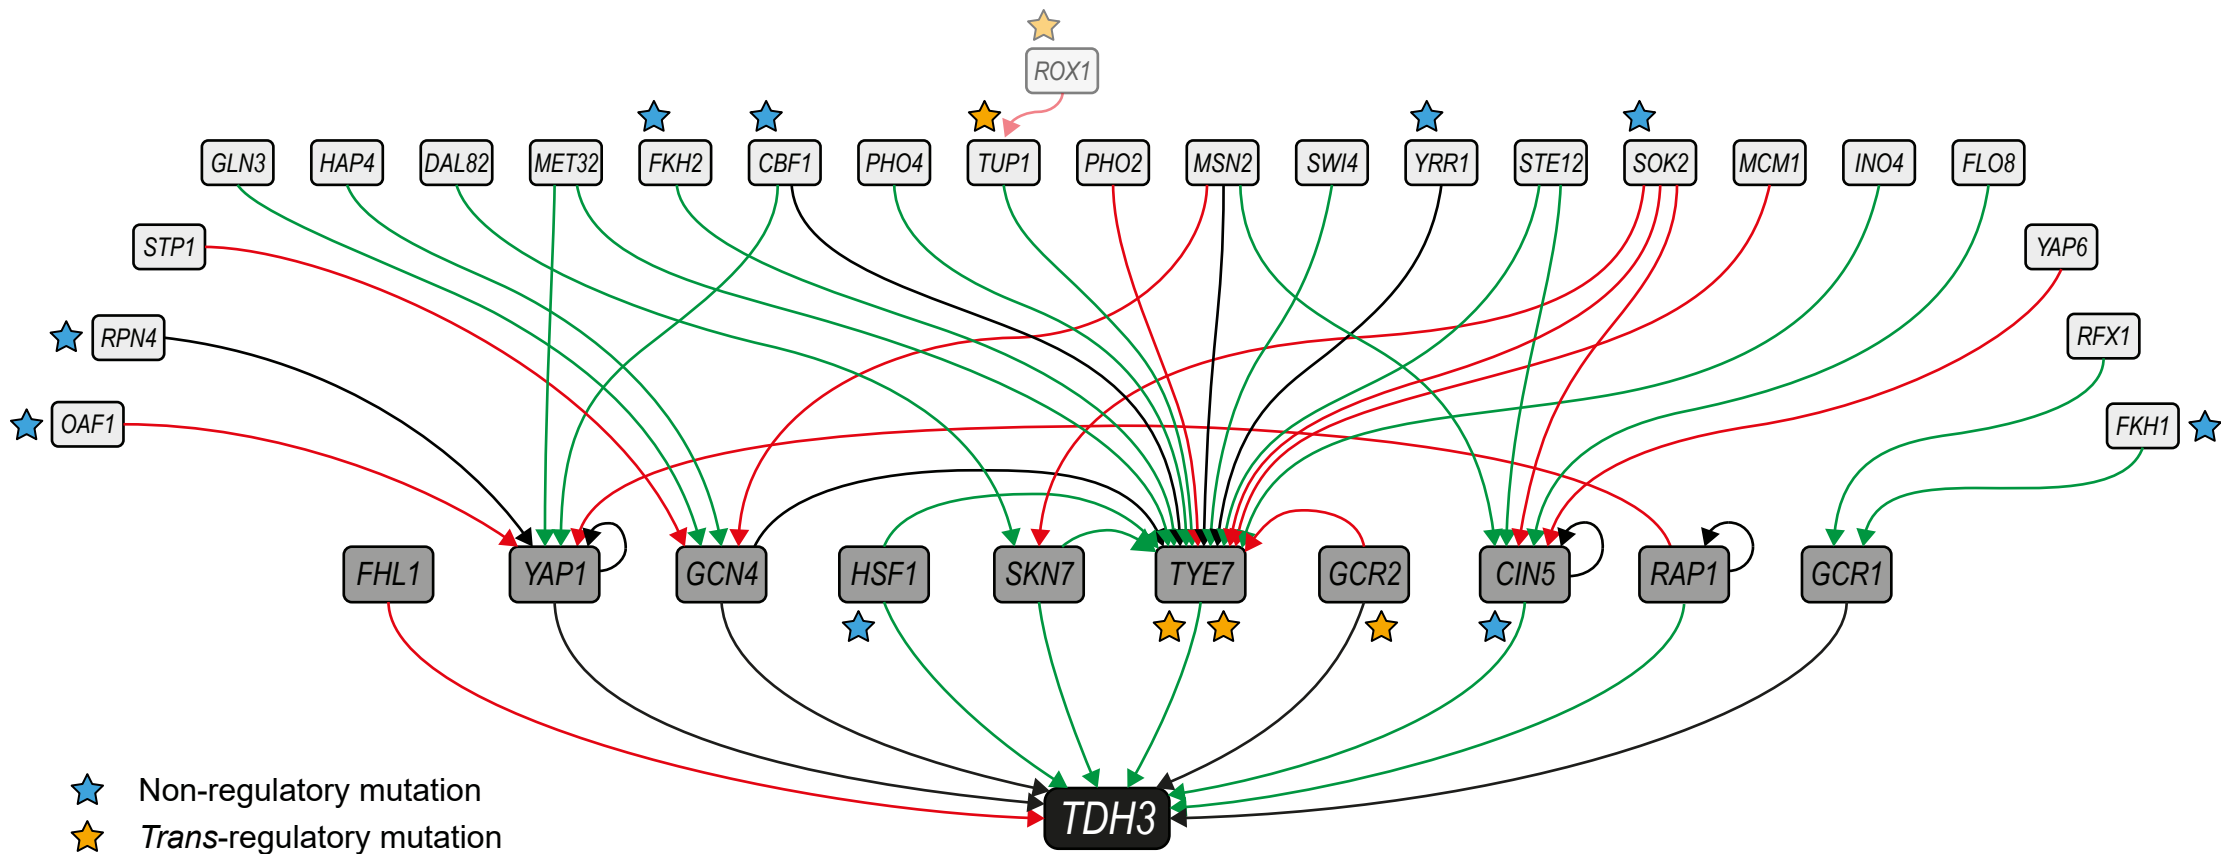

**Figure 4**

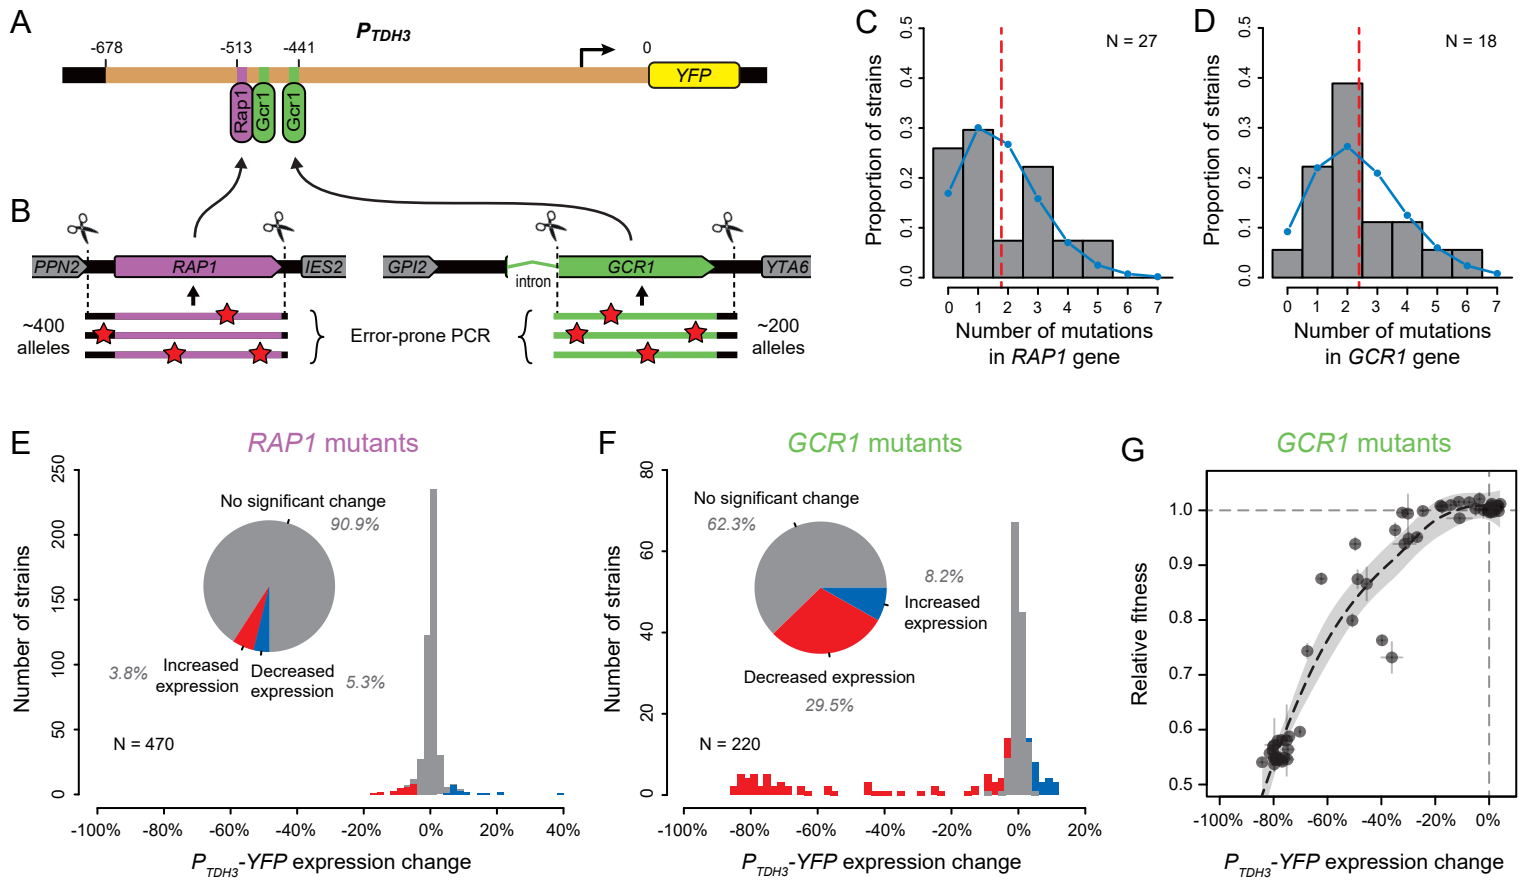

**Figure 5**

A

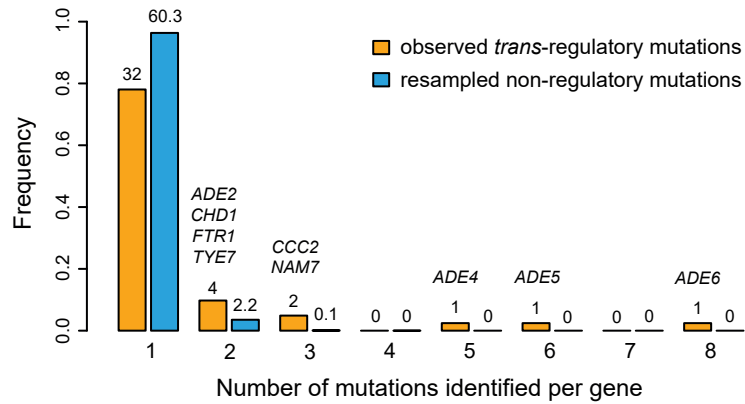

B

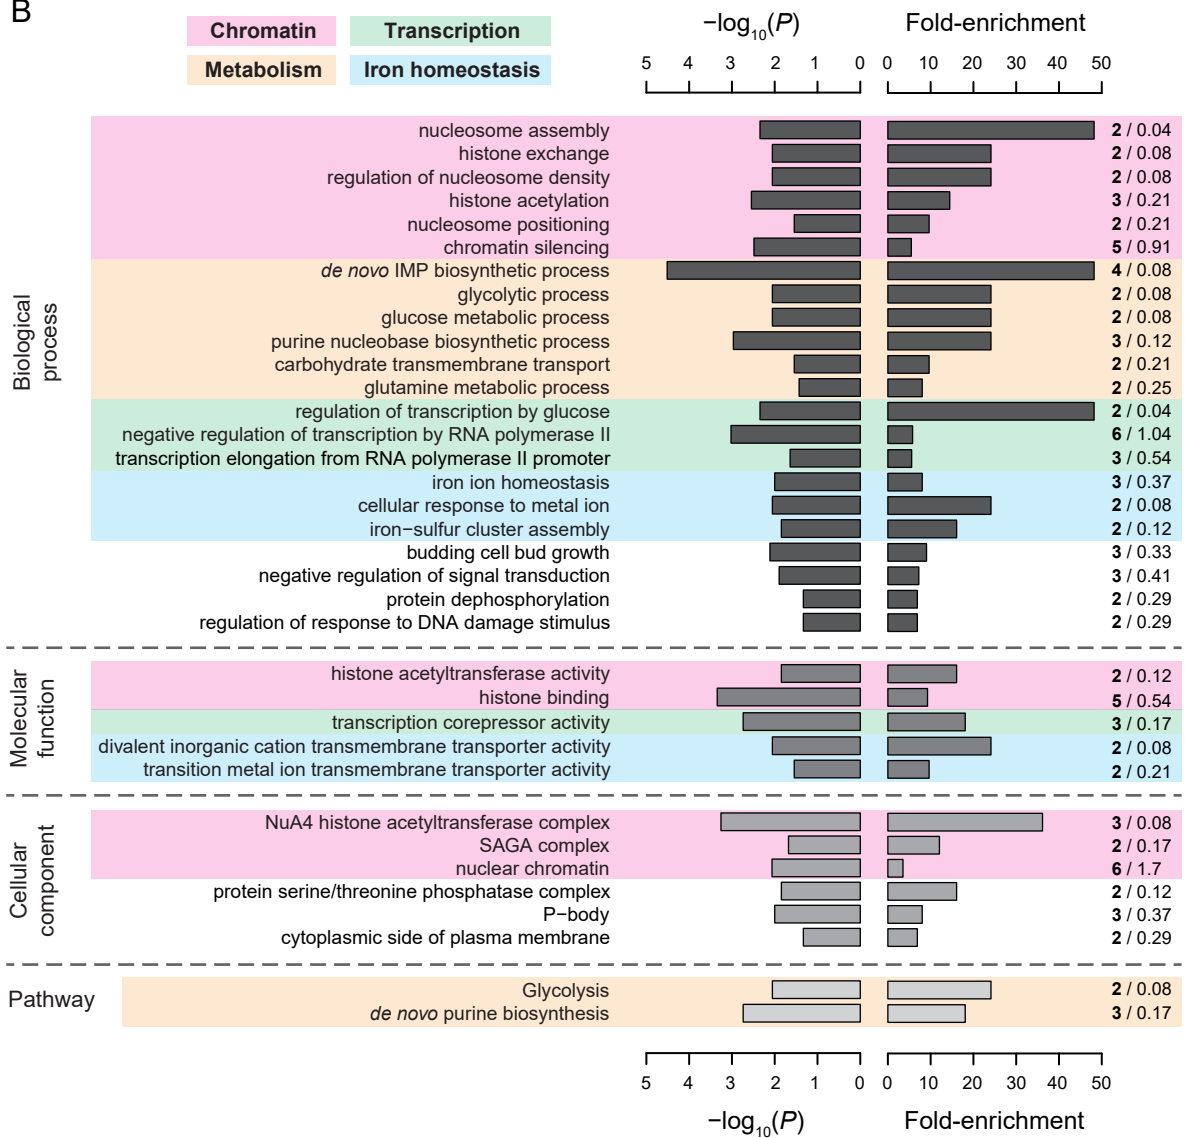

Figure 6

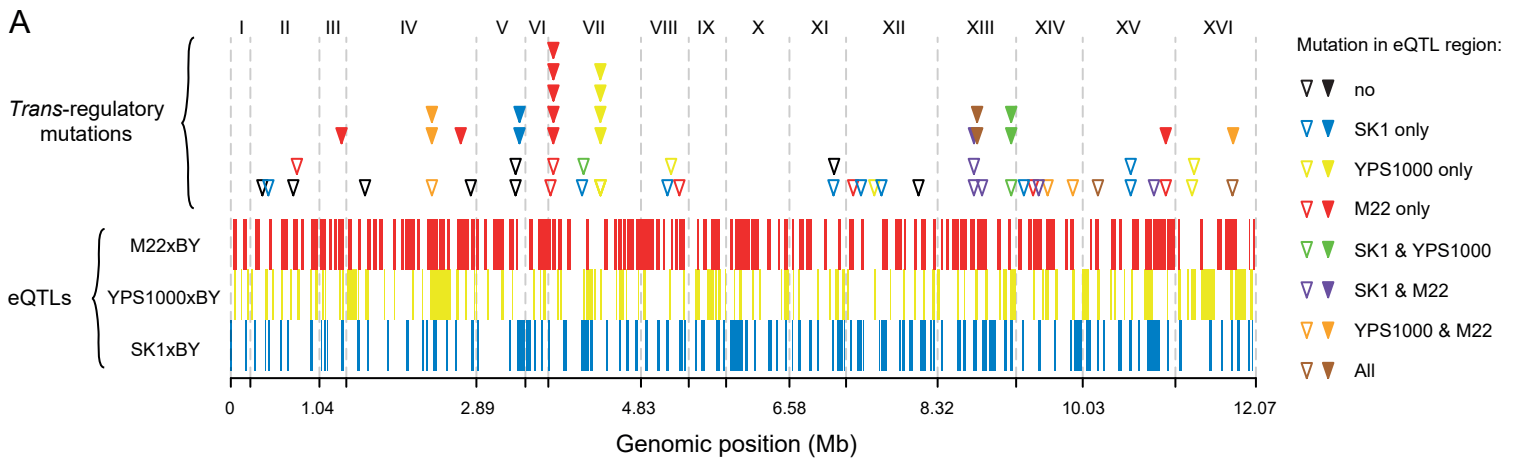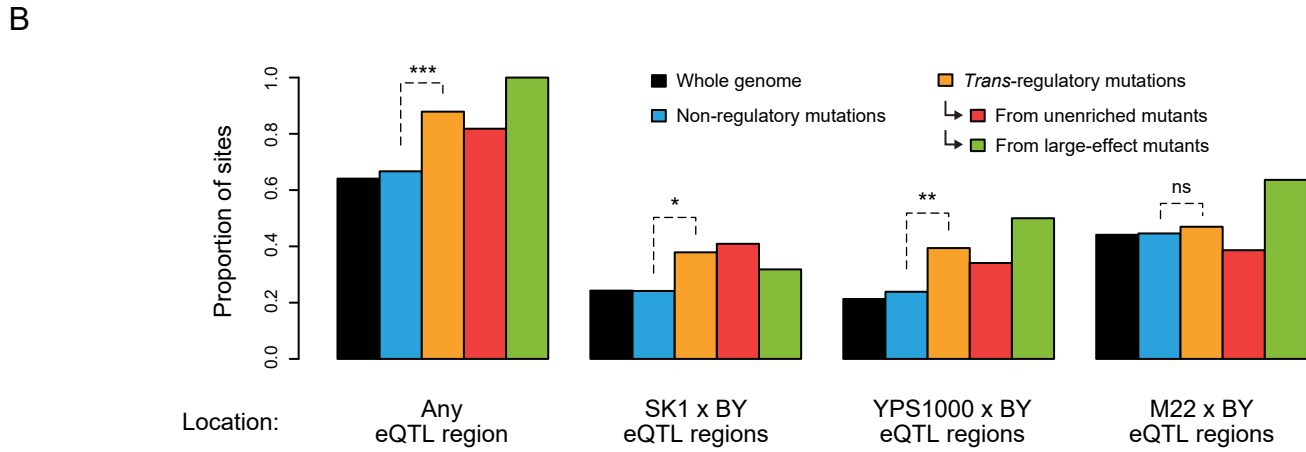

**Figure 7**
